# Supplementary material for: DCMP: database of cancer mutant protein domains
Source: Database (Oxford). 2021 Nov 13;2021:baab066. doi: 10.1093/database/baab066 (PMC8607521; doi:10.1093/database/baab066)
Supplement: baab066_Supp [file baab066_supp.zip]

Archive with 5 entries (5 files):
- supplementary_file1.pdf
- supplementary_file2.pdf
- supplementary_file3.pdf
- supplementary_file4.xlsx
- supplementary_file5.xlsx
