# Supplementary material for: DCMP: database of cancer mutant protein domains
Source: Database (Oxford). 2021 Nov 13;2021:baab066. doi: 10.1093/database/baab066 (PMC8607521; doi:10.1093/database/baab066)
Supplement: baab066_Supp [file baab066_supp.zip › supplementary_file4.xlsx]

## Sheet: The list of SMDs
Pfam_domain	Snp_count	Domain_length	locfdr values	<0.1	cancer_type
IRK	1062	1479	2.70237e-109	TRUE	Adrenal
P53	252	305	4.84146e-129	TRUE	Adrenal
zf-H2C2_2	61	1294	0.0265552	TRUE	Adrenal
VHL	48	156	1.22537e-36	TRUE	Adrenal
Cation_ATPase_N	45	69	7.84314e-98	TRUE	Adrenal
KRAB	22	451	0.0208819	TRUE	Adrenal
HIF-1	21	35	4.25211e-88	TRUE	Adrenal
HLH	11	200	0.00720187	TRUE	Adrenal
RB_A	10	266	0.098982	TRUE	Adrenal
VWC	10	171	0.0037384	TRUE	Adrenal
SH3_1	9	228	0.07868	TRUE	Adrenal
LRRNT	7	86	1.66645e-05	TRUE	Adrenal
PHD	7	99	0.000275609	TRUE	Adrenal
SH3_2	7	163	0.0495824	TRUE	Adrenal
zf-RING_2	7	183	0.09091	TRUE	Adrenal
Ank	6	84	0.000236202	TRUE	Adrenal
DUF3250	6	106	0.00545885	TRUE	Adrenal
EGF	6	93	0.00111108	TRUE	Adrenal
DEP	5	118	0.0536297	TRUE	Adrenal
Gla	5	35	2.86343e-14	TRUE	Adrenal
bZIP_Maf	4	79	0.0151438	TRUE	Adrenal
FYRN	4	55	0.000165763	TRUE	Adrenal
Gal_Lectin	4	81	0.0190048	TRUE	Adrenal
Kazal_2	4	84	0.0245349	TRUE	Adrenal
Kunitz_BPTI	4	106	0.0971153	TRUE	Adrenal
L27	4	45	2.1281e-06	TRUE	Adrenal
SM-ATX	4	72	0.00659527	TRUE	Adrenal
WW	4	90	0.0395628	TRUE	Adrenal
zf-C3HC4	4	93	0.0491173	TRUE	Adrenal
zf-FCS	4	81	0.0190048	TRUE	Adrenal
CTD_bind	3	63	0.0245349	TRUE	Adrenal
FXa_inhibition	3	72	0.0586652	TRUE	Adrenal
KRAP_IP3R_bind	3	57	0.0111049	TRUE	Adrenal
LRR_6	3	24	1.1981e-11	TRUE	Adrenal
Nebulin	3	29	2.16617e-08	TRUE	Adrenal
NHL	3	30	5.0784e-08	TRUE	Adrenal
PI-PLC-Y	3	35	4.90719e-06	TRUE	Adrenal
zf-C2H2_6	3	26	3.1754e-10	TRUE	Adrenal
zf-CCCH	3	54	0.00659527	TRUE	Adrenal
ESSS	2	50	0.0734719	TRUE	Adrenal
GIT_SHD	2	31	0.00111108	TRUE	Adrenal
GPS	2	46	0.0458311	TRUE	Adrenal
HS1_rep	2	25	2.67228e-05	TRUE	Adrenal
ig	2	52	0.0887934	TRUE	Adrenal
IQ	2	21	2.38129e-07	TRUE	Adrenal
Kelch_6	2	49	0.065461	TRUE	Adrenal
Matrilin_ccoil	2	45	0.0395628	TRUE	Adrenal
PPAK	2	28	0.000236202	TRUE	Adrenal
RCC1	2	50	0.0734719	TRUE	Adrenal
SRA1	2	51	0.0812455	TRUE	Adrenal
zf-C2H2	2	23	3.37774e-06	TRUE	Adrenal
zf-C2H2_4	2	26	5.70886e-05	TRUE	Adrenal
zf-NF-X1	2	20	5.0784e-08	TRUE	Adrenal
cEGF	1	23	0.0458311	TRUE	Adrenal
GVQW	1	22	0.034645	TRUE	Adrenal
Proteasome_A_N	1	23	0.0458311	TRUE	Adrenal
Ribosomal_L41	1	25	0.0734719	TRUE	Adrenal
zf-CCHH	1	26	0.0887934	TRUE	Adrenal
P53	1769	681	1.11116e-139	TRUE	Biliary
Ras	1134	11453	2.89898e-06	TRUE	Biliary
zf-H2C2_2	577	10536	0.021767	TRUE	Biliary
WD40	258	3908	0.00370808	TRUE	Biliary
Iso_dh	183	1097	7.93417e-15	TRUE	Biliary
EGF_CA	145	3078	0.0589728	TRUE	Biliary
Furin-like	125	1130	1.31865e-07	TRUE	Biliary
Bromodomain	111	1885	0.0120001	TRUE	Biliary
PI3Ka	91	1359	0.0032531	TRUE	Biliary
KRAB	88	1899	0.0640565	TRUE	Biliary
MIP	85	1769	0.0529048	TRUE	Biliary
EGF	79	1393	0.0164794	TRUE	Biliary
Nebulin	78	636	4.23002e-09	TRUE	Biliary
MH2	77	960	0.000259978	TRUE	Biliary
Recep_L_domain	56	865	0.00473981	TRUE	Biliary
Ets	55	1043	0.0288056	TRUE	Biliary
zf-C2H2	54	893	0.00942517	TRUE	Biliary
Peptidase_C12	53	419	1.07313e-09	TRUE	Biliary
RCC1	47	725	0.00466044	TRUE	Biliary
Plectin	43	479	3.1069e-05	TRUE	Biliary
BAH	42	972	0.0926903	TRUE	Biliary
MH1	41	400	1.30134e-06	TRUE	Biliary
C1_1	35	704	0.0423069	TRUE	Biliary
Ank	33	452	0.00110639	TRUE	Biliary
Gla	32	189	3.09531e-15	TRUE	Biliary
UPF0640	30	55	2.24626e-68	TRUE	Biliary
Pkinase_C	26	462	0.0176527	TRUE	Biliary
DUF3518	23	514	0.0785042	TRUE	Biliary
zf-B_box	23	526	0.0878973	TRUE	Biliary
PLDc_3	20	361	0.0200272	TRUE	Biliary
zf-RanBP	20	118	2.74863e-15	TRUE	Biliary
DUF4546	18	207	6.1708e-05	TRUE	Biliary
EF-hand_3	18	99	1.14546e-16	TRUE	Biliary
GVQW	18	387	0.0628522	TRUE	Biliary
zf-CCCH	17	160	4.81335e-07	TRUE	Biliary
CAP_GLY	16	267	0.0103074	TRUE	Biliary
hSH3	16	89	1.94888e-16	TRUE	Biliary
DUF3583	15	332	0.0745464	TRUE	Biliary
IQ	15	229	0.00405172	TRUE	Biliary
CHRD	14	117	8.88577e-09	TRUE	Biliary
Fox-1_C	14	237	0.0116964	TRUE	Biliary
TAN	14	306	0.0693647	TRUE	Biliary
zf-HC5HC2H	14	317	0.0838557	TRUE	Biliary
DUF3694	13	247	0.0292343	TRUE	Biliary
TPR_1	13	259	0.0397214	TRUE	Biliary
Tubulin-binding	13	95	5.57775e-11	TRUE	Biliary
CCDC14	12	248	0.0507444	TRUE	Biliary
UBA	12	218	0.0209976	TRUE	Biliary
APG5	11	158	0.00198644	TRUE	Biliary
CwfJ_C_1	11	125	4.52063e-05	TRUE	Biliary
EF-hand_like	11	240	0.0686258	TRUE	Biliary
Lig_chan-Glu_bd	11	196	0.0180707	TRUE	Biliary
Somatomedin_B	11	130	9.90936e-05	TRUE	Biliary
Cache_1	10	92	2.07248e-07	TRUE	Biliary
COPIIcoated_ERV	10	219	0.0701752	TRUE	Biliary
DSPn	10	234	0.0976428	TRUE	Biliary
Glyco_transf_43	10	212	0.0585758	TRUE	Biliary
IQ-like	10	194	0.0338707	TRUE	Biliary
LRRNT	10	131	0.000583603	TRUE	Biliary
zf-CXXC	10	94	4.66352e-07	TRUE	Biliary
zf-met	10	176	0.0161941	TRUE	Biliary
BK_channel_a	9	205	0.0862683	TRUE	Biliary
DCX	9	183	0.045694	TRUE	Biliary
Gal_Lectin	9	162	0.0196084	TRUE	Biliary
HS1_rep	9	74	5.21013e-09	TRUE	Biliary
Ribosomal_S27e	9	110	0.000191308	TRUE	Biliary
Stork_head	9	109	0.00015952	TRUE	Biliary
YL1_C	9	23	1.48132e-42	TRUE	Biliary
Acyl-CoA_dh_M	8	118	0.00285243	TRUE	Biliary
DUF106	8	187	0.0970771	TRUE	Biliary
DUF4531	8	184	0.0901955	TRUE	Biliary
F-box-like	8	84	8.4777e-06	TRUE	Biliary
KRAP_IP3R_bind	8	86	1.34868e-05	TRUE	Biliary
MNNL	8	80	2.44408e-06	TRUE	Biliary
Myosin_N	8	171	0.0610813	TRUE	Biliary
NCD3G	8	154	0.032149	TRUE	Biliary
NR_Repeat	8	146	0.0216851	TRUE	Biliary
PI3K_p85B	8	156	0.0350074	TRUE	Biliary
VCBS	8	129	0.00723257	TRUE	Biliary
zf-C2H2_4	8	145	0.0206521	TRUE	Biliary
zf-TRAF	8	168	0.0556741	TRUE	Biliary
Adhes-Ig_like	7	112	0.00678533	TRUE	Biliary
BRCA2	7	105	0.00339483	TRUE	Biliary
CDI	7	149	0.0598069	TRUE	Biliary
DUF829	7	156	0.077364	TRUE	Biliary
FAM86	7	160	0.0876775	TRUE	Biliary
LSR	7	147	0.0556741	TRUE	Biliary
Methyltransf_FA	7	104	0.00308656	TRUE	Biliary
OSCP	7	115	0.00878166	TRUE	Biliary
Ribosomal_L22e	7	164	0.0982882	TRUE	Biliary
SOCS_box	7	160	0.0876775	TRUE	Biliary
zf-C2H2_6	7	157	0.0799793	TRUE	Biliary
Acylphosphatase	6	80	0.000723123	TRUE	Biliary
BRCA-2_OB3	6	139	0.0931038	TRUE	Biliary
Calpain_inhib	6	133	0.0751653	TRUE	Biliary
CBM_48	6	87	0.00229604	TRUE	Biliary
CSD	6	130	0.0657334	TRUE	Biliary
DUF2475	6	67	3.22592e-05	TRUE	Biliary
DUF706	6	85	0.00166921	TRUE	Biliary
ecTbetaR2	6	119	0.038734	TRUE	Biliary
FA	6	94	0.00556661	TRUE	Biliary
Gate	6	129	0.0628522	TRUE	Biliary
GF_recep_IV	6	133	0.0751653	TRUE	Biliary
G-patch	6	129	0.0628522	TRUE	Biliary
HDNR	6	92	0.00430832	TRUE	Biliary
HMA	6	62	5.92461e-06	TRUE	Biliary
LST1	6	66	2.48785e-05	TRUE	Biliary
Mec-17	6	121	0.0431219	TRUE	Biliary
MHC_I_C	6	80	0.000723123	TRUE	Biliary
MORN	6	92	0.00430832	TRUE	Biliary
Mpv17_PMP22	6	68	4.14988e-05	TRUE	Biliary
NfI_DNAbd_pre-N	6	88	0.00266855	TRUE	Biliary
P53_TAD	6	25	1.12237e-22	TRUE	Biliary
RBB1NT	6	96	0.00678533	TRUE	Biliary
Sel1	6	71	0.000100836	TRUE	Biliary
Ski_Sno	6	132	0.0720571	TRUE	Biliary
TAFH	6	96	0.00678533	TRUE	Biliary
TM2	6	50	7.16048e-09	TRUE	Biliary
TMEM223	6	99	0.00920615	TRUE	Biliary
TPR_17	6	33	1.14546e-16	TRUE	Biliary
UEV	6	121	0.0431219	TRUE	Biliary
zf-CCHC	6	53	6.70072e-08	TRUE	Biliary
ANATO	5	34	2.7333e-12	TRUE	Biliary
EGF_2	5	85	0.0121022	TRUE	Biliary
FG-GAP	5	108	0.0644511	TRUE	Biliary
fn1	5	77	0.00456325	TRUE	Biliary
FNIP_N	5	82	0.00861108	TRUE	Biliary
GATA	5	104	0.0527305	TRUE	Biliary
GTPase_binding	5	42	1.19728e-08	TRUE	Biliary
Integrin_b_cyt	5	47	4.66352e-07	TRUE	Biliary
LRR_1	5	46	2.07248e-07	TRUE	Biliary
LysM	5	43	2.60717e-08	TRUE	Biliary
NHL	5	84	0.0109593	TRUE	Biliary
OGG_N	5	117	0.0976428	TRUE	Biliary
Peptidase_S24	5	78	0.00531818	TRUE	Biliary
Titin_Z	5	42	1.19728e-08	TRUE	Biliary
zf-C2HC	5	93	0.0245217	TRUE	Biliary
APC_crr	4	78	0.0350074	TRUE	Biliary
ApoB100_C	4	58	0.00229604	TRUE	Biliary
ATP_Ca_trans_C	4	64	0.00678533	TRUE	Biliary
Cylicin_N	4	60	0.00339483	TRUE	Biliary
DUF1981	4	86	0.0628522	TRUE	Biliary
DUF4609	4	70	0.0153222	TRUE	Biliary
FATC	4	66	0.00920615	TRUE	Biliary
fn2	4	84	0.0556741	TRUE	Biliary
GHMP_kinases_C	4	83	0.051988	TRUE	Biliary
Hairy_orange	4	43	1.34868e-05	TRUE	Biliary
hEGF	4	26	3.63656e-13	TRUE	Biliary
HIF-1	4	69	0.0135028	TRUE	Biliary
ING	4	69	0.0135028	TRUE	Biliary
LRR_6	4	74	0.0237195	TRUE	Biliary
LsmAD	4	70	0.0153222	TRUE	Biliary
Matrilin_ccoil	4	47	9.12106e-05	TRUE	Biliary
Neugrin	4	41	4.62474e-06	TRUE	Biliary
PAPA-1	4	50	0.000268914	TRUE	Biliary
PHD_3	4	65	0.0077082	TRUE	Biliary
PIG-H	4	71	0.017488	TRUE	Biliary
PP2C_C	4	80	0.0405623	TRUE	Biliary
Receptor_IA-2	4	55	0.00117137	TRUE	Biliary
UPF0449	4	62	0.00494254	TRUE	Biliary
VGCC_beta4Aa_N	4	42	8.4777e-06	TRUE	Biliary
zf-PARP	4	87	0.067328	TRUE	Biliary
Abhydro_lipase	3	25	7.16048e-09	TRUE	Biliary
ATP_synt_H	3	45	0.00339483	TRUE	Biliary
cEGF	3	28	3.80912e-07	TRUE	Biliary
Connexin50	3	67	0.0782385	TRUE	Biliary
DSS1_SEM1	3	58	0.0331079	TRUE	Biliary
DUF1518	3	58	0.0331079	TRUE	Biliary
DUF1899	3	65	0.0657334	TRUE	Biliary
DUF3595	3	49	0.00821134	TRUE	Biliary
EF-hand_1	3	58	0.0331079	TRUE	Biliary
EF-hand_2	3	45	0.00339483	TRUE	Biliary
ELM2	3	53	0.0167712	TRUE	Biliary
GIT_SHD	3	31	5.92461e-06	TRUE	Biliary
HEAT	3	62	0.0507444	TRUE	Biliary
KCl_Cotrans_1	3	30	2.44408e-06	TRUE	Biliary
L27_2	3	58	0.0331079	TRUE	Biliary
NDUF_C2	3	57	0.0292343	TRUE	Biliary
PKI	3	70	0.0961323	TRUE	Biliary
PPAK	3	56	0.0252574	TRUE	Biliary
Smoothelin	3	50	0.010186	TRUE	Biliary
Synaptobrevin	3	58	0.0331079	TRUE	Biliary
TGF_beta_GS	3	42	0.00147275	TRUE	Biliary
VHP	3	36	0.000127291	TRUE	Biliary
zf-MYND	3	37	0.000222666	TRUE	Biliary
zf-piccolo	3	61	0.045694	TRUE	Biliary
Alveol-reg_P311	2	33	0.00920615	TRUE	Biliary
BTK	2	32	0.00678533	TRUE	Biliary
Cg6151-P	2	40	0.0405623	TRUE	Biliary
DUF1154	2	43	0.0628522	TRUE	Biliary
DUF1785	2	45	0.0812776	TRUE	Biliary
F-box	2	44	0.0720571	TRUE	Biliary
GRIP	2	43	0.0628522	TRUE	Biliary
Hyd_WA	2	32	0.00678533	TRUE	Biliary
INCENP_N	2	38	0.0292343	TRUE	Biliary
ITAM	2	43	0.0628522	TRUE	Biliary
MOSC_N	2	41	0.0482346	TRUE	Biliary
NMU	2	25	0.000268914	TRUE	Biliary
NPP	2	45	0.0812776	TRUE	Biliary
OAR	2	41	0.0482346	TRUE	Biliary
OGFr_III	2	20	2.44408e-06	TRUE	Biliary
Pax7	2	42	0.0556741	TRUE	Biliary
Peptidase_S68	2	34	0.0121022	TRUE	Biliary
RED_N	2	36	0.0196084	TRUE	Biliary
SAMP	2	21	8.4777e-06	TRUE	Biliary
Shugoshin_N	2	46	0.0901955	TRUE	Biliary
Snurportin1	2	40	0.0405623	TRUE	Biliary
SSXRD	2	34	0.0121022	TRUE	Biliary
TORC_N	2	37	0.0237195	TRUE	Biliary
U5_2-snRNA_bdg	2	47	0.0998965	TRUE	Biliary
Yae1_N	2	39	0.0350074	TRUE	Biliary
zf-C3H1	2	22	2.48785e-05	TRUE	Biliary
zf-RING_6	2	42	0.0556741	TRUE	Biliary
Cementoin	1	17	0.0121022	TRUE	Biliary
EndIII_4Fe-2S	1	17	0.0121022	TRUE	Biliary
Integrin_alpha	1	15	0.00339483	TRUE	Biliary
PAM2	1	18	0.0196084	TRUE	Biliary
TOH_N	1	22	0.0720571	TRUE	Biliary
UIM	1	18	0.0196084	TRUE	Biliary
WH2	1	23	0.0901955	TRUE	Biliary
Xin	1	16	0.00678533	TRUE	Biliary
P53	542	176	2.20912e-156	TRUE	Bone
zf-H2C2_2	418	7055	0.00469386	TRUE	Bone
Iso_dh	323	926	3.92058e-44	TRUE	Bone
G-alpha	233	3550	0.00139445	TRUE	Bone
PNP_UDP_1	85	636	4.44829e-12	TRUE	Bone
Pro-rich	42	917	0.0364584	TRUE	Bone
Ank	38	560	0.000943791	TRUE	Bone
PHD	28	553	0.0186751	TRUE	Bone
RB_A	28	653	0.0544038	TRUE	Bone
EGF	24	512	0.0320306	TRUE	Bone
Nebulin	23	231	3.33738e-07	TRUE	Bone
PAX	20	375	0.0120652	TRUE	Bone
Sterol-sensing	20	309	0.00166897	TRUE	Bone
dsrm	17	424	0.077755	TRUE	Bone
Gla	17	77	5.40726e-24	TRUE	Bone
IL6Ra-bind	16	288	0.00870804	TRUE	Bone
zf-C2H2	14	303	0.0347897	TRUE	Bone
Arm	13	282	0.035225	TRUE	Bone
zf-B_box	13	329	0.0830325	TRUE	Bone
Plectin	12	90	4.75847e-12	TRUE	Bone
STAG	12	120	3.04096e-07	TRUE	Bone
CLN5	11	217	0.0185257	TRUE	Bone
IQ	11	146	0.00019119	TRUE	Bone
PRY	11	228	0.02645	TRUE	Bone
Stork_head	11	189	0.00556503	TRUE	Bone
zf-C2HC	11	169	0.00151621	TRUE	Bone
SH3_2	10	246	0.0727366	TRUE	Bone
SH3_9	10	201	0.0209439	TRUE	Bone
Somatomedin_B	10	134	0.000216282	TRUE	Bone
GVQW	9	213	0.0584574	TRUE	Bone
DUF4482	8	141	0.00694953	TRUE	Bone
TSP_3	8	186	0.0535791	TRUE	Bone
4F5	7	76	2.83591e-06	TRUE	Bone
EF-hand_3	7	99	0.000517496	TRUE	Bone
Requiem_N	7	148	0.0303026	TRUE	Bone
Aida_C2	6	149	0.0761799	TRUE	Bone
BCDHK_Adom3	6	156	0.0943301	TRUE	Bone
DP	6	144	0.0636528	TRUE	Bone
DUF2392	6	101	0.00456383	TRUE	Bone
FYRN	6	55	1.45627e-08	TRUE	Bone
MORN	6	107	0.00793334	TRUE	Bone
NR_Repeat	6	97	0.00288888	TRUE	Bone
Ocnus	6	92	0.0014797	TRUE	Bone
PMC2NT	6	92	0.0014797	TRUE	Bone
Smoothelin	6	110	0.0102256	TRUE	Bone
SOCS_box	6	149	0.0761799	TRUE	Bone
THF_DHG_CYH_C	6	107	0.00793334	TRUE	Bone
UPF0640	6	55	1.45627e-08	TRUE	Bone
VCX_VCY	6	135	0.0446831	TRUE	Bone
zf-HC5HC2H_2	6	58	8.52117e-08	TRUE	Bone
zf-RING_2	6	115	0.0147565	TRUE	Bone
AKNA	5	108	0.0344112	TRUE	Bone
F-box-like	5	122	0.069746	TRUE	Bone
UPF0016	5	74	0.00100207	TRUE	Bone
zf-C2H2_4	5	96	0.0149852	TRUE	Bone
zf-C2H2_6	5	83	0.00387589	TRUE	Bone
ANATO	4	34	1.1619e-09	TRUE	Bone
Cache_1	4	92	0.0506622	TRUE	Bone
Clathrin_propel	4	32	7.64284e-11	TRUE	Bone
DNA_pol_lambd_f	4	104	0.0943301	TRUE	Bone
DUF3651	4	76	0.0136038	TRUE	Bone
EF-1_beta_acid	4	26	4.73711e-15	TRUE	Bone
HDAC4_Gln	4	89	0.0416181	TRUE	Bone
LRR_6	4	48	2.61774e-05	TRUE	Bone
LRRNT	4	90	0.0446831	TRUE	Bone
PapD-like	4	94	0.0564493	TRUE	Bone
RCC1_2	4	60	0.00118417	TRUE	Bone
Rio2_N	4	83	0.0266637	TRUE	Bone
RNA_pol_Rpb2_5	4	42	1.25305e-06	TRUE	Bone
SapB_1	4	33	2.9307e-10	TRUE	Bone
SNARE	4	63	0.00218977	TRUE	Bone
Sorb	4	50	6.54456e-05	TRUE	Bone
SRF-TF	4	51	8.52357e-05	TRUE	Bone
SSXRD	4	100	0.0786098	TRUE	Bone
TPR_10	4	75	0.0120652	TRUE	Bone
TPR_2	4	98	0.0712459	TRUE	Bone
zf-C3HC4_2	4	82	0.0242937	TRUE	Bone
zf-RING_5	4	95	0.0597665	TRUE	Bone
zf-RING_6	4	42	1.25305e-06	TRUE	Bone
ACT_7	3	71	0.0584574	TRUE	Bone
DAP10	3	67	0.0426455	TRUE	Bone
DnaJ_CXXCXGXG	3	61	0.0226894	TRUE	Bone
FerA	3	66	0.038501	TRUE	Bone
GTPase_binding	3	42	0.000453903	TRUE	Bone
HJURP_C	3	67	0.0426455	TRUE	Bone
Integrin_b_cyt	3	47	0.00204661	TRUE	Bone
LSR	3	49	0.003161	TRUE	Bone
NIPSNAP	3	59	0.018126	TRUE	Bone
Proteasome_A_N	3	23	1.35603e-11	TRUE	Bone
Rotamase_3	3	61	0.0226894	TRUE	Bone
SAP	3	70	0.0545409	TRUE	Bone
TNFR_c6	3	72	0.0636528	TRUE	Bone
Tudor-knot	3	64	0.0320306	TRUE	Bone
Urotensin_II	3	12	3.77706e-27	TRUE	Bone
zf-CCCH	3	54	0.00870804	TRUE	Bone
BCL_N	2	52	0.0943301	TRUE	Bone
BRK	2	46	0.0506622	TRUE	Bone
CBM_14	2	47	0.0564493	TRUE	Bone
CRAL_TRIO_N	2	47	0.0564493	TRUE	Bone
DUF4500	2	43	0.0335237	TRUE	Bone
Dynein_IC2	2	33	0.00357659	TRUE	Bone
EF-hand_5	2	24	2.61774e-05	TRUE	Bone
EF-hand_6	2	33	0.00357659	TRUE	Bone
FAD_binding_4	2	52	0.0943301	TRUE	Bone
FF	2	49	0.0712459	TRUE	Bone
KN_motif	2	39	0.0170173	TRUE	Bone
Mago-bind	2	26	0.000136185	TRUE	Bone
P53_tetramer	2	42	0.0289912	TRUE	Bone
PLAC	2	35	0.00645288	TRUE	Bone
PLAC9	2	38	0.0136038	TRUE	Bone
PPAK	2	28	0.000453903	TRUE	Bone
Ribosomal_S14	2	38	0.0136038	TRUE	Bone
ROKNT	2	43	0.0335237	TRUE	Bone
SAB	2	49	0.0712459	TRUE	Bone
SapB_2	2	35	0.00645288	TRUE	Bone
Synapsin_N	2	32	0.00261252	TRUE	Bone
tRNA_int_endo	2	40	0.0203018	TRUE	Bone
UBA_4	2	42	0.0289912	TRUE	Bone
UIM	2	18	9.62631e-09	TRUE	Bone
Vps53_N	2	37	0.0109689	TRUE	Bone
WAP	2	41	0.0242937	TRUE	Bone
WH2	2	31	0.00175682	TRUE	Bone
zf-met	2	51	0.0857559	TRUE	Bone
Calponin	1	26	0.0943301	TRUE	Bone
hEGF	1	13	0.000136185	TRUE	Bone
Integrin_alpha	1	15	0.00118417	TRUE	Bone
Opiods_neuropep	1	23	0.0506622	TRUE	Bone
Xin	1	16	0.00261252	TRUE	Bone
zf-C2HC_2	1	25	0.0786098	TRUE	Bone
zf-CCHC	1	18	0.00870804	TRUE	Bone
P53	5359	878	1.37738e-119	TRUE	Brain
Iso_dh	4961	1734	1.37738e-119	TRUE	Brain
zf-H2C2_2	1410	13918	4.72353e-05	TRUE	Brain
Furin-like	486	1287	4.75771e-36	TRUE	Brain
PNP_UDP_1	443	887	5.78564e-52	TRUE	Brain
DSPc	440	2882	2.04161e-10	TRUE	Brain
MIP	288	2194	3.80159e-08	TRUE	Brain
PTEN_C2	284	826	1.1232e-31	TRUE	Brain
WD40	272	4879	0.062427	TRUE	Brain
MHC_I	251	2980	0.00119002	TRUE	Brain
EGF_CA	236	3712	0.0253196	TRUE	Brain
SH2	230	3621	0.025513	TRUE	Brain
PI3Ka	194	1344	1.51344e-09	TRUE	Brain
RB_A	194	460	7.74449e-42	TRUE	Brain
GF_recep_IV	189	603	3.35845e-28	TRUE	Brain
Recep_L_domain	170	1019	5.20628e-12	TRUE	Brain
HMG_box	161	1201	2.33342e-08	TRUE	Brain
FKBP_C	156	1273	3.93574e-07	TRUE	Brain
KH_1	142	1761	0.00220921	TRUE	Brain
KRAB	142	1894	0.00527109	TRUE	Brain
C1-set	139	2237	0.0300523	TRUE	Brain
EGF	139	2178	0.0245285	TRUE	Brain
Keratin_B2_2	136	1656	0.00169222	TRUE	Brain
HLH	99	1642	0.0373309	TRUE	Brain
Nebulin	99	802	3.12279e-07	TRUE	Brain
zf-C2H2	99	1097	0.000417969	TRUE	Brain
MHC_I_C	83	84	9.59339e-118	TRUE	Brain
SNF5	74	196	5.08044e-36	TRUE	Brain
Plectin	70	690	4.56527e-05	TRUE	Brain
zf-HC5HC2H	69	582	9.34523e-07	TRUE	Brain
PI3K_p85B	65	234	3.34814e-24	TRUE	Brain
Pro-rich	65	894	0.00738673	TRUE	Brain
Sterol-sensing	63	767	0.00168787	TRUE	Brain
PI3K_C2	57	668	0.00100544	TRUE	Brain
CD36	52	906	0.0516328	TRUE	Brain
Gla	47	161	1.10957e-25	TRUE	Brain
ZU5	46	865	0.0806889	TRUE	Brain
C8	43	450	0.000152478	TRUE	Brain
Epiglycanin_TR	42	501	0.00125668	TRUE	Brain
Ank	41	726	0.0573743	TRUE	Brain
Gal_Lectin	39	245	3.79154e-11	TRUE	Brain
WW	38	360	1.92389e-05	TRUE	Brain
GST_C	36	566	0.0252325	TRUE	Brain
PI3K_rbd	34	515	0.0183896	TRUE	Brain
SPAN-X	34	559	0.0347492	TRUE	Brain
SWIB	34	348	8.82883e-05	TRUE	Brain
FAM86	33	322	3.41178e-05	TRUE	Brain
APG5	32	311	2.95717e-05	TRUE	Brain
DUF2450	32	562	0.0541447	TRUE	Brain
OGFr_III	32	80	4.78126e-39	TRUE	Brain
DNA_primase_lrg	31	267	1.76971e-06	TRUE	Brain
Dispanin	27	378	0.00894043	TRUE	Brain
F-box-like	27	494	0.0701117	TRUE	Brain
IQ	27	336	0.00230652	TRUE	Brain
RVT_1	27	517	0.0897219	TRUE	Brain
Kelch_3	26	496	0.0878706	TRUE	Brain
FRG1	25	190	3.63659e-08	TRUE	Brain
PPAK	24	278	0.000838563	TRUE	Brain
OSCP	23	150	1.73511e-10	TRUE	Brain
MHC_II_alpha	22	329	0.0166266	TRUE	Brain
Pkinase_C	22	405	0.0724809	TRUE	Brain
zf-FCS	22	411	0.0781206	TRUE	Brain
FF	20	224	0.000489193	TRUE	Brain
P53_TAD	20	25	6.57916e-90	TRUE	Brain
Runt	20	270	0.00588472	TRUE	Brain
STAG	20	240	0.00134092	TRUE	Brain
DUF1897	19	61	4.20916e-28	TRUE	Brain
DUF3452	18	125	1.59566e-09	TRUE	Brain
DUF3583	18	332	0.073219	TRUE	Brain
Lig_chan-Glu_bd	18	262	0.0128618	TRUE	Brain
SAB	18	98	5.28265e-14	TRUE	Brain
zf-CXXC	18	316	0.0539888	TRUE	Brain
DND1_DSRM	17	136	1.72224e-07	TRUE	Brain
ecTbetaR2	17	119	1.95449e-09	TRUE	Brain
FISNA	17	146	1.6556e-06	TRUE	Brain
GVQW	17	324	0.0873985	TRUE	Brain
TILa	17	280	0.0352768	TRUE	Brain
Abhydro_lipase	16	88	9.10171e-14	TRUE	Brain
Adhes-Ig_like	16	112	1.95449e-09	TRUE	Brain
G6PD_C	16	295	0.0730742	TRUE	Brain
IRK_N	16	45	4.58993e-33	TRUE	Brain
Apc3	15	164	0.000328237	TRUE	Brain
Defensin_beta_2	15	246	0.0340082	TRUE	Brain
DUF2392	15	101	5.28053e-10	TRUE	Brain
Laps	15	124	5.37381e-07	TRUE	Brain
LRRNT	15	182	0.00159144	TRUE	Brain
MORN	15	227	0.018265	TRUE	Brain
WAP	15	261	0.0512525	TRUE	Brain
FA	14	187	0.00534409	TRUE	Brain
Cylicin_N	13	169	0.00395368	TRUE	Brain
Motile_Sperm	13	179	0.00748505	TRUE	Brain
NCD3G	13	208	0.0288541	TRUE	Brain
Titin_Z	13	124	2.19811e-05	TRUE	Brain
zf-C2H2_4	13	146	0.000507395	TRUE	Brain
CENP-P	12	177	0.0147156	TRUE	Brain
CwfJ_C_1	12	125	0.000139123	TRUE	Brain
FG-GAP	12	187	0.0233855	TRUE	Brain
fn1	12	155	0.00362097	TRUE	Brain
SRI	12	95	1.42252e-07	TRUE	Brain
SUFU_C	12	222	0.0743747	TRUE	Brain
TB2_DP1_HVA22	12	190	0.0266926	TRUE	Brain
UPF0640	12	55	9.39012e-18	TRUE	Brain
L27	11	153	0.00837143	TRUE	Brain
LIM_bind	11	205	0.0771893	TRUE	Brain
RPEL	11	104	1.84233e-05	TRUE	Brain
Sorb	11	148	0.00571364	TRUE	Brain
zf-MYND	11	193	0.0537619	TRUE	Brain
zf-RanBP	11	201	0.0696138	TRUE	Brain
BNIP2	10	131	0.00434872	TRUE	Brain
DUF2146	10	92	8.53215e-06	TRUE	Brain
MBD	10	123	0.0019779	TRUE	Brain
Serine_rich	10	157	0.0249386	TRUE	Brain
zf-RING_6	10	42	7.5465e-20	TRUE	Brain
APC10	9	116	0.00350935	TRUE	Brain
cEGF	9	124	0.00753961	TRUE	Brain
DNA_pol_delta_4	9	74	4.77658e-07	TRUE	Brain
Herpes_UL45	9	113	0.00255544	TRUE	Brain
PI31_Prot_N	9	144	0.0288541	TRUE	Brain
SEEK1	9	149	0.036793	TRUE	Brain
zf-C2H2_6	9	136	0.018063	TRUE	Brain
ZZ	9	134	0.0160175	TRUE	Brain
4F5	8	38	6.40888e-17	TRUE	Brain
AAA_14	8	125	0.0239422	TRUE	Brain
API5	8	79	4.7703e-05	TRUE	Brain
BRCA2	8	105	0.00444678	TRUE	Brain
Ca_chan_IQ	8	103	0.00345341	TRUE	Brain
Calponin	8	124	0.0222653	TRUE	Brain
CDI	8	149	0.0769559	TRUE	Brain
DUF3454	8	131	0.0335963	TRUE	Brain
DUF4098	8	143	0.0610647	TRUE	Brain
HNH	8	43	3.53579e-14	TRUE	Brain
HS1_rep	8	111	0.00815662	TRUE	Brain
NfI_DNAbd_pre-N	8	86	0.000229169	TRUE	Brain
NUDIX_4	8	103	0.00345341	TRUE	Brain
PapD-like	8	94	0.00104271	TRUE	Brain
RNA_pol_Rpb6	8	52	1.49799e-10	TRUE	Brain
Rotamase_3	8	61	3.86489e-08	TRUE	Brain
zf-C2HC	8	147	0.0717671	TRUE	Brain
zf-TAZ	8	155	0.09555	TRUE	Brain
AKNA	7	108	0.021298	TRUE	Brain
CENP-S	7	136	0.0969113	TRUE	Brain
eIF-1a	7	64	7.71665e-06	TRUE	Brain
HDAC4_Gln	7	89	0.00290535	TRUE	Brain
HHH	7	60	1.57757e-06	TRUE	Brain
Kelch_6	7	50	5.20973e-09	TRUE	Brain
Ribosomal_L37	7	77	0.000369024	TRUE	Brain
Somatomedin_B	7	134	0.0895848	TRUE	Brain
zf-CCCH	7	79	0.000539712	TRUE	Brain
DUF3398	6	96	0.0288541	TRUE	Brain
FNIP_N	6	82	0.00682641	TRUE	Brain
GTPase_binding	6	108	0.0637821	TRUE	Brain
hEGF	6	52	2.01672e-06	TRUE	Brain
Ig_Tie2_1	6	96	0.0288541	TRUE	Brain
KIF1B	6	45	2.71198e-08	TRUE	Brain
NOD	6	114	0.0858596	TRUE	Brain
Notch	6	115	0.0902015	TRUE	Brain
NRDE	6	90	0.0170459	TRUE	Brain
OAR	6	63	0.000162037	TRUE	Brain
OCD_Mu_crystall	6	90	0.0170459	TRUE	Brain
Receptor_2B4	6	106	0.0564718	TRUE	Brain
SbcCD_C	6	79	0.00460958	TRUE	Brain
Smoothelin	6	55	8.05737e-06	TRUE	Brain
Stork_head	6	109	0.0673616	TRUE	Brain
Trefoil	6	87	0.0123253	TRUE	Brain
UPF0728	6	86	0.0109802	TRUE	Brain
zf-H2C2_5	6	75	0.00243139	TRUE	Brain
DUF1875	5	84	0.0410906	TRUE	Brain
Fe_hyd_SSU	5	57	0.000608842	TRUE	Brain
HbrB	5	83	0.0375814	TRUE	Brain
HIF-1	5	68	0.0063943	TRUE	Brain
LELP1	5	96	0.0910631	TRUE	Brain
Matrilin_ccoil	5	92	0.0722908	TRUE	Brain
SSXRD	5	67	0.00550719	TRUE	Brain
TBP-binding	5	66	0.00473927	TRUE	Brain
TPR_10	5	73	0.0132888	TRUE	Brain
TPR_17	5	33	2.57902e-10	TRUE	Brain
UPF0449	5	62	0.00220602	TRUE	Brain
z-alpha	5	59	0.00110311	TRUE	Brain
CBF_beta	4	78	0.0987178	TRUE	Brain
CHORD	4	65	0.0320338	TRUE	Brain
Churchill	4	65	0.0320338	TRUE	Brain
CybS	4	74	0.0743747	TRUE	Brain
Dickkopf_N	4	53	0.00493288	TRUE	Brain
DUF2367	4	34	1.24337e-06	TRUE	Brain
Dynein_IC2	4	66	0.035803	TRUE	Brain
EF-hand_5	4	74	0.0743747	TRUE	Brain
FAM212	4	61	0.0193186	TRUE	Brain
FerI	4	72	0.0637821	TRUE	Brain
Hormone_2	4	28	1.95449e-09	TRUE	Brain
Integrase_DNA	4	72	0.0637821	TRUE	Brain
LsmAD	4	70	0.052895	TRUE	Brain
Macscav_rec	4	49	0.00186279	TRUE	Brain
MCC-bdg_PDZ	4	67	0.0402192	TRUE	Brain
Opiods_neuropep	4	23	8.13383e-13	TRUE	Brain
PAP_assoc	4	60	0.0170459	TRUE	Brain
PAPA-1	4	50	0.00243139	TRUE	Brain
Rad50_zn_hook	4	56	0.00894043	TRUE	Brain
SAP	4	70	0.052895	TRUE	Brain
Somatostatin	4	18	3.70173e-18	TRUE	Brain
TFIIB	4	71	0.0583187	TRUE	Brain
TPR_2	4	64	0.0288541	TRUE	Brain
TPR_7	4	36	5.64397e-06	TRUE	Brain
Trm112p	4	40	6.19006e-05	TRUE	Brain
V-SNARE_C	4	66	0.035803	TRUE	Brain
Wyosine_form	4	64	0.0288541	TRUE	Brain
Xin	4	64	0.0288541	TRUE	Brain
BH4	3	27	5.64397e-06	TRUE	Brain
DUF4500	3	43	0.0109802	TRUE	Brain
DUF902	3	42	0.00894043	TRUE	Brain
NDUF_C2	3	57	0.0858596	TRUE	Brain
NHL	3	56	0.0778105	TRUE	Brain
P53_tetramer	3	42	0.00894043	TRUE	Brain
RDM	3	42	0.00894043	TRUE	Brain
TORC_N	3	37	0.00205425	TRUE	Brain
TPX2	3	57	0.0858596	TRUE	Brain
TUG-UBL1	3	46	0.0200638	TRUE	Brain
WHIM1	3	50	0.0387582	TRUE	Brain
YL1_C	3	23	4.94157e-08	TRUE	Brain
A1_Propeptide	2	29	0.0123253	TRUE	Brain
Alveol-reg_P311	2	33	0.035803	TRUE	Brain
CRF	2	39	0.0987178	TRUE	Brain
CXCR4_N	2	33	0.035803	TRUE	Brain
DUF1126	2	33	0.035803	TRUE	Brain
EZH2_WD-Binding	2	30	0.0170459	TRUE	Brain
JmjN	2	35	0.052895	TRUE	Brain
PHD_2	2	35	0.052895	TRUE	Brain
PLAC9	2	38	0.0858596	TRUE	Brain
PLDc	2	28	0.00894043	TRUE	Brain
QLQ	2	37	0.0743747	TRUE	Brain
RNA_POL_M_15KD	2	36	0.0637821	TRUE	Brain
SapA	2	34	0.0445377	TRUE	Brain
SapB_2	2	35	0.052895	TRUE	Brain
SHIPPO-rpt	2	31	0.0222653	TRUE	Brain
SUZ-C	2	34	0.0445377	TRUE	Brain
zf-CCCH_2	2	19	2.03563e-05	TRUE	Brain
zf-CCHC	2	36	0.0637821	TRUE	Brain
zf-U11-48K	2	27	0.00588472	TRUE	Brain
SAMP	1	19	0.0858596	TRUE	Brain
UIM	1	18	0.0637821	TRUE	Brain
P53	10798	878	2.03275e-86	TRUE	Breast
PI3Ka	1958	1711	2.03275e-86	TRUE	Breast
Hormone_recep	992	10352	0.0260818	TRUE	Breast
Furin-like	305	1287	2.13626e-12	TRUE	Breast
PI3K_C2	300	1136	2.6172e-14	TRUE	Breast
Runt	249	540	4.13905e-32	TRUE	Breast
CBF_beta	232	255	1.57986e-75	TRUE	Breast
RB_A	227	653	4.28742e-21	TRUE	Breast
Nebulin	204	1699	0.00116601	TRUE	Breast
zf-C2H2	202	2328	0.064441	TRUE	Breast
Gla	198	412	5.37362e-34	TRUE	Breast
GATA	187	352	1.23357e-38	TRUE	Breast
PTEN_C2	176	817	8.71756e-11	TRUE	Breast
Med23	146	1313	0.00394703	TRUE	Breast
Recep_L_domain	142	1549	0.0403702	TRUE	Breast
PI3K_p85B	107	234	1.45381e-31	TRUE	Breast
Plectin	106	916	0.00216131	TRUE	Breast
Cadherin_pro	86	454	8.62853e-09	TRUE	Breast
IQ	78	647	0.00108161	TRUE	Breast
GF_recep_IV	76	726	0.0095347	TRUE	Breast
CLN5	74	662	0.00360913	TRUE	Breast
APG5	73	311	3.46302e-12	TRUE	Breast
OSCP	73	323	1.55324e-11	TRUE	Breast
SWIB	58	424	8.39924e-05	TRUE	Breast
GVQW	56	605	0.037283	TRUE	Breast
Menin	56	559	0.0162217	TRUE	Breast
WW	55	631	0.0624243	TRUE	Breast
AKNA	54	108	1.10145e-35	TRUE	Breast
DUF4455	51	474	0.00652834	TRUE	Breast
zf-C2H2_4	50	501	0.0170445	TRUE	Breast
CENP-P	48	177	7.50693e-15	TRUE	Breast
MORN	46	521	0.0566652	TRUE	Breast
CDI	43	149	3.76012e-16	TRUE	Breast
DUF3384	42	422	0.0176418	TRUE	Breast
RFX1_trans_act	42	460	0.0416501	TRUE	Breast
zf-CXXC	42	459	0.0409574	TRUE	Breast
EF-hand_3	40	378	0.0080661	TRUE	Breast
Clathrin_lg_ch	37	383	0.0240522	TRUE	Breast
Myb_DNA-bind_6	37	435	0.0757239	TRUE	Breast
zf-CCCH	37	366	0.0142411	TRUE	Breast
DUF3608	36	272	0.000171766	TRUE	Breast
Stork_head	35	189	1.56001e-08	TRUE	Breast
DED	33	334	0.0192215	TRUE	Breast
Abhydro_lipase	32	151	1.64571e-10	TRUE	Breast
RunxI	32	190	3.59482e-07	TRUE	Breast
DUF3583	31	332	0.0344807	TRUE	Breast
P53_TAD	31	25	7.50638e-83	TRUE	Breast
MRP	29	201	2.38161e-05	TRUE	Breast
BRCA2	28	175	1.50201e-06	TRUE	Breast
DUF3454	28	197	3.404e-05	TRUE	Breast
zf-met	28	292	0.0258658	TRUE	Breast
DOT1	27	203	0.000150842	TRUE	Breast
Rotamase_3	27	172	2.6378e-06	TRUE	Breast
RPEL	27	311	0.0642001	TRUE	Breast
zf-C2HC	27	231	0.0017386	TRUE	Breast
DUF2146	26	286	0.043448	TRUE	Breast
Nitroreductase	26	308	0.0802249	TRUE	Breast
BCIP	25	203	0.000694637	TRUE	Breast
PapD-like	24	94	1.12561e-13	TRUE	Breast
PPAK	24	217	0.00437184	TRUE	Breast
TBX	24	193	0.000601269	TRUE	Breast
Fox-1_C	23	238	0.0239795	TRUE	Breast
NODP	23	254	0.0452441	TRUE	Breast
TMEM223	23	252	0.0417704	TRUE	Breast
API5	22	79	2.01599e-15	TRUE	Breast
Lge1	22	229	0.0252558	TRUE	Breast
Requiem_N	22	148	1.13398e-05	TRUE	Breast
Cylicin_N	21	169	0.000608411	TRUE	Breast
FAM86	21	233	0.0473685	TRUE	Breast
Bclx_interact	20	74	8.36598e-15	TRUE	Breast
DUF4556	19	197	0.0244041	TRUE	Breast
Sperm_Ag_HE2	19	132	2.54266e-05	TRUE	Breast
Titin_Z	19	113	3.76432e-07	TRUE	Breast
NRDE	18	90	1.1972e-09	TRUE	Breast
Churchill	17	65	3.58816e-14	TRUE	Breast
DUF3657	17	126	0.000107923	TRUE	Breast
FRG1	17	190	0.0506727	TRUE	Breast
FYRN	17	205	0.0907303	TRUE	Breast
HEAT	17	185	0.0396062	TRUE	Breast
Homeobox_KN	17	201	0.0790906	TRUE	Breast
PHD_2	17	179	0.0289958	TRUE	Breast
Ca_chan_IQ	16	140	0.00268593	TRUE	Breast
CactinC_cactus	16	125	0.00032009	TRUE	Breast
RNA_pol_Rpb6	16	159	0.0152454	TRUE	Breast
zf-RING_6	16	140	0.00268593	TRUE	Breast
CENP-R	15	139	0.00629813	TRUE	Breast
LRR_1	15	90	4.66125e-07	TRUE	Breast
SUZ	15	162	0.0371771	TRUE	Breast
zf-H2C2_5	15	175	0.0711358	TRUE	Breast
ARGLU	14	151	0.0367528	TRUE	Breast
BRCA-2_OB3	14	139	0.0150493	TRUE	Breast
DUF1087	14	65	8.7569e-11	TRUE	Breast
DUF2431	14	171	0.0982355	TRUE	Breast
NOD	14	171	0.0982355	TRUE	Breast
SYCE1	14	153	0.0409574	TRUE	Breast
MHC_I_C	13	106	0.000734563	TRUE	Breast
PDEase_I_N	13	122	0.00728011	TRUE	Breast
Xin	13	128	0.0136072	TRUE	Breast
RHS_repeat	12	89	0.000109068	TRUE	Breast
SRI	12	95	0.000449413	TRUE	Breast
UPF0449	12	62	3.86914e-09	TRUE	Breast
DUF1126	11	133	0.0922912	TRUE	Breast
EF-hand_5	11	123	0.050889	TRUE	Breast
hEGF	11	78	3.93393e-05	TRUE	Breast
HHH	11	60	2.48271e-08	TRUE	Breast
HPIP	11	133	0.0922912	TRUE	Breast
OPA3	11	133	0.0922912	TRUE	Breast
OSR1_C	11	113	0.0224202	TRUE	Breast
RRP7	11	130	0.078822	TRUE	Breast
UPF0640	11	124	0.0545417	TRUE	Breast
zf-C5HC2	11	108	0.013227	TRUE	Breast
zf-Sec23_Sec24	11	79	5.29392e-05	TRUE	Breast
53-BP1_Tudor	10	122	0.0975518	TRUE	Breast
DUF4568	10	102	0.0208937	TRUE	Breast
DZR	10	110	0.043448	TRUE	Breast
ecTbetaR2	10	119	0.0829114	TRUE	Breast
Fer4_20	10	114	0.0595819	TRUE	Breast
LMSTEN	10	96	0.0102045	TRUE	Breast
P68HR	10	35	5.21168e-16	TRUE	Breast
TGF_beta_GS	10	58	1.60184e-07	TRUE	Breast
Tubulin-binding	10	94	0.00740683	TRUE	Breast
cEGF	9	95	0.0298	TRUE	Breast
Dppa2_A	9	86	0.00957619	TRUE	Breast
DSS1_SEM1	9	58	3.68457e-06	TRUE	Breast
LSR	9	49	2.29342e-08	TRUE	Breast
NDUF_C2	9	57	2.10752e-06	TRUE	Breast
Per1	9	97	0.0365168	TRUE	Breast
PIG-H	9	71	0.000415178	TRUE	Breast
SAB	9	49	2.29342e-08	TRUE	Breast
SapB_2	9	104	0.0656286	TRUE	Breast
Smoothelin	9	110	0.0986148	TRUE	Breast
UIM	9	90	0.0166104	TRUE	Breast
DUF2439	8	76	0.00878455	TRUE	Breast
DUF4500	8	43	1.41782e-08	TRUE	Breast
DUF498	8	72	0.0040072	TRUE	Breast
L27_1	8	64	0.000551046	TRUE	Breast
OGFr_III	8	60	0.000140323	TRUE	Breast
PTS_EIIA_2	8	96	0.0878526	TRUE	Breast
Ribosomal_S6	8	95	0.0816664	TRUE	Breast
Tower	8	42	6.91682e-09	TRUE	Breast
PUA	7	78	0.0493098	TRUE	Breast
COX6C	6	73	0.0959519	TRUE	Breast
DUF1897	6	33	3.32801e-08	TRUE	Breast
DUF938	6	65	0.0381636	TRUE	Breast
GYF	6	56	0.00685545	TRUE	Breast
L27_2	6	58	0.0111389	TRUE	Breast
Opiods_neuropep	6	23	3.84403e-14	TRUE	Breast
Receptor_IA-2	6	55	0.00545076	TRUE	Breast
WSK	6	62	0.0236799	TRUE	Breast
z-alpha	6	67	0.0502758	TRUE	Breast
zf-CCHC	6	71	0.0795826	TRUE	Breast
Chromosome_seg	5	59	0.0779076	TRUE	Breast
PQQ	5	33	6.47888e-06	TRUE	Breast
SAMP	5	42	0.00134432	TRUE	Breast
SRP19	5	51	0.0208937	TRUE	Breast
WRW	5	39	0.000306097	TRUE	Breast
Ank_3	4	31	0.000279138	TRUE	Breast
AT_hook	4	13	1.28176e-17	TRUE	Breast
Bim_N	4	37	0.00615786	TRUE	Breast
BPS	4	48	0.0878526	TRUE	Breast
EF-1_beta_acid	4	26	4.45788e-06	TRUE	Breast
ESR1_C	4	44	0.043448	TRUE	Breast
GTPase_binding	4	42	0.0280876	TRUE	Breast
HIF-1	4	34	0.00158967	TRUE	Breast
MOZART1	4	48	0.0878526	TRUE	Breast
Neuromodulin_N	4	31	0.000279138	TRUE	Breast
P120R	4	23	1.32058e-07	TRUE	Breast
Pax7	4	46	0.0634832	TRUE	Breast
Plug_translocon	4	35	0.00268593	TRUE	Breast
Propeptide_C1	4	41	0.0219449	TRUE	Breast
Proteasome_A_N	4	46	0.0634832	TRUE	Breast
RPA_interact_N	4	42	0.0280876	TRUE	Breast
Statherin	4	41	0.0219449	TRUE	Breast
Hist_rich_Ca-bd	3	30	0.0166104	TRUE	Breast
KCl_Cotrans_1	3	30	0.0166104	TRUE	Breast
TPR_17	3	33	0.043448	TRUE	Breast
Yos1	3	36	0.0878526	TRUE	Breast
Bombesin	2	14	3.05776e-05	TRUE	Breast
Clathrin-link	2	24	0.0878526	TRUE	Breast
DUF4535	2	21	0.0280876	TRUE	Breast
Somatostatin	2	18	0.0040072	TRUE	Breast
TOM_sub5	2	23	0.0634832	TRUE	Breast
zf-CCCH_2	2	19	0.00878455	TRUE	Breast
Hormone_4	1	9	0.0040072	TRUE	Breast
zf-H2C2_2	653	11830	0.00541078	TRUE	Cervix
P53	223	699	3.7599e-40	TRUE	Cervix
WD40	209	3324	0.000759659	TRUE	Cervix
PI3Ka	182	782	5.21364e-27	TRUE	Cervix
Histone	111	2388	0.0395121	TRUE	Cervix
KRAB	86	2034	0.0898594	TRUE	Cervix
Keratin_B2_2	83	1152	6.55339e-05	TRUE	Cervix
Gla	48	119	1.07926e-54	TRUE	Cervix
MAGE_N	46	948	0.0256189	TRUE	Cervix
Ank	39	510	2.02008e-05	TRUE	Cervix
EGF	38	861	0.0637467	TRUE	Cervix
Furin-like	38	808	0.0350928	TRUE	Cervix
zf-C2H2	36	628	0.00319688	TRUE	Cervix
Plectin	35	257	2.08621e-12	TRUE	Cervix
Nebulin	34	405	2.85652e-06	TRUE	Cervix
MIR	24	482	0.0193791	TRUE	Cervix
Keratin_B2	23	434	0.0091947	TRUE	Cervix
PHD	23	494	0.0387921	TRUE	Cervix
Glutenin_hmw	22	349	0.000722712	TRUE	Cervix
Med12-LCEWAV	21	473	0.0602084	TRUE	Cervix
Dispanin	20	386	0.0120805	TRUE	Cervix
Metallothio	19	183	1.7885e-08	TRUE	Cervix
HRM	17	247	0.000150456	TRUE	Cervix
IQ	17	146	6.76126e-10	TRUE	Cervix
PI3K_p85B	17	78	7.96164e-25	TRUE	Cervix
RB_A	17	266	0.000568519	TRUE	Cervix
F-box-like	15	304	0.0211997	TRUE	Cervix
PRY	15	282	0.00871902	TRUE	Cervix
zf-CCCH	14	162	1.47814e-06	TRUE	Cervix
EF-hand_3	13	191	0.000192834	TRUE	Cervix
HAD_2	13	184	9.69344e-05	TRUE	Cervix
AKNA	12	108	2.55813e-09	TRUE	Cervix
FF	12	266	0.0525393	TRUE	Cervix
UBA	12	224	0.00779986	TRUE	Cervix
zf-C2H2_6	12	131	3.81922e-07	TRUE	Cervix
CENP-P	11	177	0.000927373	TRUE	Cervix
DED	11	253	0.0726333	TRUE	Cervix
MHC_I_C	11	79	9.13078e-13	TRUE	Cervix
PAX	11	247	0.0583683	TRUE	Cervix
CCDC92	10	187	0.00803057	TRUE	Cervix
DIM1	10	236	0.0882014	TRUE	Cervix
LysM	10	43	5.42185e-27	TRUE	Cervix
Pam16	10	100	4.82175e-08	TRUE	Cervix
WW	10	178	0.00411848	TRUE	Cervix
zf-C2H2_4	10	192	0.0114187	TRUE	Cervix
zf-RanBP	10	206	0.02549	TRUE	Cervix
Bclx_interact	9	37	1.58529e-28	TRUE	Cervix
DUF4523	9	135	0.000275945	TRUE	Cervix
GVQW	9	171	0.0100795	TRUE	Cervix
OSCP	9	115	1.27822e-05	TRUE	Cervix
4HBT	8	84	1.53019e-07	TRUE	Cervix
Abhydro_lipase	8	152	0.0100795	TRUE	Cervix
ATP_synt_H	8	110	5.59407e-05	TRUE	Cervix
Ca_chan_IQ	8	103	1.46371e-05	TRUE	Cervix
CAMSAP_CH	8	170	0.0349066	TRUE	Cervix
DUF1088	8	168	0.0313367	TRUE	Cervix
Med25_NR-box	8	157	0.0147163	TRUE	Cervix
MORN	8	130	0.00106807	TRUE	Cervix
RasGEF_N_2	8	115	0.000128705	TRUE	Cervix
Rotamase_3	8	61	1.09146e-11	TRUE	Cervix
Stork_head	8	60	5.38261e-12	TRUE	Cervix
FG-GAP	7	111	0.0007168	TRUE	Cervix
fn2	7	167	0.0964806	TRUE	Cervix
Homeobox_KN	7	161	0.0726333	TRUE	Cervix
LRR_6	7	123	0.00352924	TRUE	Cervix
SAA	7	164	0.08349	TRUE	Cervix
zf-met	7	97	6.38862e-05	TRUE	Cervix
DAN	6	119	0.0168558	TRUE	Cervix
DSL	6	63	1.53019e-07	TRUE	Cervix
DUF2146	6	92	0.000413221	TRUE	Cervix
FHA	6	143	0.0957196	TRUE	Cervix
HbrB	6	83	6.21285e-05	TRUE	Cervix
JmjN	6	34	2.07224e-18	TRUE	Cervix
Nucleoporin2	6	141	0.0852705	TRUE	Cervix
OAR	6	103	0.00245702	TRUE	Cervix
PPAK	6	111	0.00704373	TRUE	Cervix
SMC_hinge	6	129	0.0392363	TRUE	Cervix
SSXRD	6	135	0.0595769	TRUE	Cervix
TrkA_N	6	100	0.00161711	TRUE	Cervix
Tubulin-binding	6	63	1.53019e-07	TRUE	Cervix
zf-C3HC4	6	115	0.011197	TRUE	Cervix
zf-RING_6	6	42	2.96667e-13	TRUE	Cervix
DUF4564	5	95	0.0100795	TRUE	Cervix
GATA	5	108	0.041271	TRUE	Cervix
PDEase_I_N	5	61	4.77811e-06	TRUE	Cervix
Titin_Z	5	43	7.03912e-10	TRUE	Cervix
TMEM223	5	99	0.0165157	TRUE	Cervix
zf-AN1	5	118	0.0882014	TRUE	Cervix
zf-MYND	5	74	0.000222218	TRUE	Cervix
BRF1	4	95	0.0930472	TRUE	Cervix
CaMBD	4	77	0.0117503	TRUE	Cervix
CBF_beta	4	78	0.0134161	TRUE	Cervix
Cbl_N3	4	86	0.0392363	TRUE	Cervix
DUF1981	4	78	0.0134161	TRUE	Cervix
EF-hand_6	4	94	0.0852705	TRUE	Cervix
eIF-5a	4	68	0.00213171	TRUE	Cervix
fn1	4	75	0.00837548	TRUE	Cervix
GRIP	4	92	0.0726333	TRUE	Cervix
HDNR	4	92	0.0726333	TRUE	Cervix
hEGF	4	26	7.9739e-15	TRUE	Cervix
Hormone_2	4	56	7.43899e-05	TRUE	Cervix
LCCL	4	93	0.0790029	TRUE	Cervix
MHC_II_beta	4	80	0.0185433	TRUE	Cervix
Neugrin	4	41	8.6759e-08	TRUE	Cervix
NR_Repeat	4	95	0.0930472	TRUE	Cervix
RFX_DNA_binding	4	85	0.0349066	TRUE	Cervix
RPA_interact_M	4	49	5.26137e-06	TRUE	Cervix
SnAC	4	70	0.00334273	TRUE	Cervix
WGR	4	85	0.0349066	TRUE	Cervix
WRW	4	39	2.49584e-08	TRUE	Cervix
BRK	3	42	7.43899e-05	TRUE	Cervix
DUF1087	3	65	0.0426196	TRUE	Cervix
DUF1731	3	49	0.00114095	TRUE	Cervix
DUF4514	3	61	0.0218557	TRUE	Cervix
DUF938	3	43	0.000122776	TRUE	Cervix
EF_TS	3	42	7.43899e-05	TRUE	Cervix
ERK-JNK_inhib	3	61	0.0218557	TRUE	Cervix
FerA	3	66	0.0492704	TRUE	Cervix
L27_N	3	49	0.00114095	TRUE	Cervix
LAG1-DNAbind	3	62	0.0264762	TRUE	Cervix
LINES_N	3	69	0.0726333	TRUE	Cervix
LRRCT	3	26	8.6029e-10	TRUE	Cervix
LSR	3	49	0.00114095	TRUE	Cervix
NHL	3	30	4.82175e-08	TRUE	Cervix
NODP	3	63	0.0313367	TRUE	Cervix
Pcc1	3	56	0.00779986	TRUE	Cervix
PHD_2	3	71	0.0903608	TRUE	Cervix
RBD-FIP	3	41	4.96963e-05	TRUE	Cervix
Ribosomal_L29	3	59	0.0151469	TRUE	Cervix
Smoothelin	3	55	0.00634058	TRUE	Cervix
Sperm_Ag_HE2	3	58	0.0122999	TRUE	Cervix
SRRM_C	3	70	0.0811033	TRUE	Cervix
SUV3_C	3	49	0.00114095	TRUE	Cervix
z-alpha	3	59	0.0151469	TRUE	Cervix
Ank_3	2	33	0.00135397	TRUE	Cervix
APC_15aa	2	16	5.86315e-11	TRUE	Cervix
AT_hook	2	13	7.9739e-15	TRUE	Cervix
BAT2_N	2	38	0.0100795	TRUE	Cervix
cEGF	2	47	0.0852705	TRUE	Cervix
CHCH	2	34	0.00213171	TRUE	Cervix
CXCR4_N	2	33	0.00135397	TRUE	Cervix
DUF1154	2	44	0.0492704	TRUE	Cervix
DUF2411	2	36	0.00490505	TRUE	Cervix
DUF3697	2	33	0.00135397	TRUE	Cervix
Dynein_IC2	2	33	0.00135397	TRUE	Cervix
FOLN	2	22	4.77785e-07	TRUE	Cervix
Galanin	2	29	0.00014634	TRUE	Cervix
GTPase_binding	2	42	0.0313367	TRUE	Cervix
IF4E	2	38	0.0100795	TRUE	Cervix
INCENP_N	2	38	0.0100795	TRUE	Cervix
MAP1B_neuraxin	2	34	0.00213171	TRUE	Cervix
Microtub_assoc	2	46	0.0726333	TRUE	Cervix
Neuromodulin_N	2	31	0.000496311	TRUE	Cervix
NfI_DNAbd_pre-N	2	41	0.0240016	TRUE	Cervix
NPR3	2	46	0.0726333	TRUE	Cervix
OSR1_C	2	38	0.0100795	TRUE	Cervix
P120R	2	23	1.31437e-06	TRUE	Cervix
P53_tetramer	2	42	0.0313367	TRUE	Cervix
P68HR	2	35	0.00334273	TRUE	Cervix
PGI	2	47	0.0852705	TRUE	Cervix
RHS_repeat	2	35	0.00334273	TRUE	Cervix
Ribosomal_L44	2	47	0.0852705	TRUE	Cervix
RPEL	2	26	1.7197e-05	TRUE	Cervix
SapB_1	2	33	0.00135397	TRUE	Cervix
Sgf11	2	33	0.00135397	TRUE	Cervix
TCR_zetazeta	2	33	0.00135397	TRUE	Cervix
TGS	2	44	0.0492704	TRUE	Cervix
TPR_10	2	42	0.0313367	TRUE	Cervix
VGCC_beta4Aa_N	2	43	0.0392363	TRUE	Cervix
Xin	2	32	0.000846033	TRUE	Cervix
zf-C2HC	2	30	0.000275945	TRUE	Cervix
Calponin	1	23	0.0726333	TRUE	Cervix
TOH_N	1	19	0.0100795	TRUE	Cervix
UIM	1	18	0.00490505	TRUE	Cervix
Urotensin_II	1	11	4.77785e-07	TRUE	Cervix
YL1_C	1	23	0.0726333	TRUE	Cervix
P53	1790	878	1.28321e-94	TRUE	Endometrium
DSPc	1000	4428	1.76424e-12	TRUE	Endometrium
PTEN_C2	633	957	1.30277e-55	TRUE	Endometrium
PI3Ka	362	1711	2.45072e-11	TRUE	Endometrium
PI3K_p85B	312	156	1.28321e-94	TRUE	Endometrium
Nebulin	308	2296	6.95528e-05	TRUE	Endometrium
DNA_pol_B_exo1	222	1477	3.5422e-06	TRUE	Endometrium
MIR	206	1910	0.00492168	TRUE	Endometrium
Gla	175	441	7.84771e-28	TRUE	Endometrium
HEAT	169	186	1.36883e-83	TRUE	Endometrium
PI3K_C2	144	883	3.06495e-07	TRUE	Endometrium
DUF3518	110	708	1.47204e-06	TRUE	Endometrium
CLN5	95	662	1.31776e-05	TRUE	Endometrium
IQ	91	746	0.000538855	TRUE	Endometrium
RB_A	87	653	7.79217e-05	TRUE	Endometrium
EF-hand_2	86	777	0.00310446	TRUE	Endometrium
DUF3591	84	928	0.0404101	TRUE	Endometrium
DED	78	413	2.22432e-09	TRUE	Endometrium
CENP-P	64	177	3.5635e-24	TRUE	Endometrium
Cylicin_N	64	279	8.78151e-13	TRUE	Endometrium
MBD	57	560	0.0110352	TRUE	Endometrium
Stork_head	56	189	2.70368e-18	TRUE	Endometrium
GVQW	55	616	0.0462986	TRUE	Endometrium
Synapsin_C	52	609	0.0673012	TRUE	Endometrium
Clathrin_lg_ch	50	396	0.00027033	TRUE	Endometrium
TB2_DP1_HVA22	44	511	0.0633892	TRUE	Endometrium
EF-hand_3	42	470	0.0458939	TRUE	Endometrium
zf-CXXC	42	321	0.000129497	TRUE	Endometrium
zf-CCCH	41	367	0.00275939	TRUE	Endometrium
APG5	40	311	0.000184294	TRUE	Endometrium
ASXH	40	398	0.0126806	TRUE	Endometrium
Abhydro_lipase	38	214	1.77153e-08	TRUE	Endometrium
MORN	37	449	0.0897484	TRUE	Endometrium
AKNA	36	214	1.25227e-07	TRUE	Endometrium
CHD5	35	387	0.0406915	TRUE	Endometrium
SWIB	35	348	0.0125878	TRUE	Endometrium
Fra10Ac1	30	118	8.66669e-15	TRUE	Endometrium
OSCP	30	288	0.00800916	TRUE	Endometrium
Rod_C	30	359	0.0809581	TRUE	Endometrium
RunxI	30	293	0.010265	TRUE	Endometrium
ATP_Ca_trans_C	28	321	0.0573252	TRUE	Endometrium
Rotamase_3	28	172	3.34576e-07	TRUE	Endometrium
zf-C2HC	28	300	0.0303242	TRUE	Endometrium
PDEase_I_N	27	122	3.92954e-12	TRUE	Endometrium
Trefoil	26	259	0.0128304	TRUE	Endometrium
FYRN	25	256	0.0184983	TRUE	Endometrium
API5	24	79	5.66725e-19	TRUE	Endometrium
MCC-bdg_PDZ	24	260	0.0339797	TRUE	Endometrium
PPP5	24	275	0.0570811	TRUE	Endometrium
Somatomedin_B	24	266	0.0414636	TRUE	Endometrium
Bclx_interact	23	74	1.17541e-19	TRUE	Endometrium
ALMS_motif	22	263	0.0803185	TRUE	Endometrium
Casc1	22	188	0.00122408	TRUE	Endometrium
SAB	22	248	0.0493716	TRUE	Endometrium
TMEM223	22	252	0.0569256	TRUE	Endometrium
zf-RING_6	22	75	3.91267e-18	TRUE	Endometrium
Herpes_UL45	21	232	0.0404101	TRUE	Endometrium
Ribosomal_L19e	20	148	6.05418e-05	TRUE	Endometrium
DIM1	19	103	4.61242e-09	TRUE	Endometrium
Tmemb_14	19	125	2.57112e-06	TRUE	Endometrium
Acylphosphatase	18	178	0.0118829	TRUE	Endometrium
F_actin_bind	18	213	0.0738683	TRUE	Endometrium
FAM104	18	222	0.0998583	TRUE	Endometrium
pKID	18	84	1.54035e-11	TRUE	Endometrium
Titin_Z	18	116	1.5353e-06	TRUE	Endometrium
ecTbetaR2	17	119	1.52102e-05	TRUE	Endometrium
La	17	175	0.0196344	TRUE	Endometrium
SAP	17	209	0.0978774	TRUE	Endometrium
VGCC_beta4Aa_N	17	169	0.0125659	TRUE	Endometrium
DUF4534	16	161	0.0147079	TRUE	Endometrium
hSH3	16	175	0.0371292	TRUE	Endometrium
LysM	16	174	0.035245	TRUE	Endometrium
PapD-like	16	170	0.0275423	TRUE	Endometrium
RHIM	16	149	0.00524058	TRUE	Endometrium
SnAC	16	139	0.00163926	TRUE	Endometrium
Tox-GHH	16	158	0.0117006	TRUE	Endometrium
NHR2	15	134	0.002685	TRUE	Endometrium
TAN	15	162	0.0329623	TRUE	Endometrium
XLF	15	163	0.0349925	TRUE	Endometrium
DUF2146	14	92	2.51406e-06	TRUE	Endometrium
DUF4523	14	135	0.00859482	TRUE	Endometrium
WGR	14	168	0.0827121	TRUE	Endometrium
DUF829	13	156	0.0827121	TRUE	Endometrium
Rad10	13	132	0.016671	TRUE	Endometrium
SRF-TF	13	153	0.070417	TRUE	Endometrium
CENP-R	12	139	0.0621683	TRUE	Endometrium
CHB_HEX_C_1	12	78	1.96704e-06	TRUE	Endometrium
Churchill	12	65	4.53081e-09	TRUE	Endometrium
DUF1126	12	101	0.000955816	TRUE	Endometrium
Ig_Tie2_1	12	96	0.000349092	TRUE	Endometrium
NOD	12	114	0.00668474	TRUE	Endometrium
Smoothelin	12	110	0.00408683	TRUE	Endometrium
VHP	12	144	0.0827121	TRUE	Endometrium
zf-C4pol	12	139	0.0621683	TRUE	Endometrium
DSL	11	126	0.0569256	TRUE	Endometrium
DUF498	11	72	2.31618e-06	TRUE	Endometrium
GTPase_binding	11	42	1.99067e-15	TRUE	Endometrium
HDAC4_Gln	11	89	0.000437171	TRUE	Endometrium
LSR	11	98	0.00258381	TRUE	Endometrium
zf-C5HC2	11	108	0.0109506	TRUE	Endometrium
DZR	10	61	2.46013e-07	TRUE	Endometrium
Ipi1_N	10	106	0.0267571	TRUE	Endometrium
RICTOR_phospho	10	107	0.0298814	TRUE	Endometrium
ATP-synt_F6	9	97	0.0322814	TRUE	Endometrium
CCDC-167	9	85	0.00626133	TRUE	Endometrium
DUF750	9	64	2.22539e-05	TRUE	Endometrium
hEGF	9	78	0.0015486	TRUE	Endometrium
Mis14	9	67	6.78915e-05	TRUE	Endometrium
NOPS	9	81	0.00296117	TRUE	Endometrium
Opiods_neuropep	9	72	0.000349092	TRUE	Endometrium
Pam16	9	100	0.0425017	TRUE	Endometrium
zf-RNPHF	9	31	8.78594e-18	TRUE	Endometrium
Alveol-reg_P311	8	33	6.7102e-14	TRUE	Endometrium
BPS	8	97	0.0892248	TRUE	Endometrium
BRF1	8	95	0.0760967	TRUE	Endometrium
DUF4485	8	88	0.0389974	TRUE	Endometrium
HHH	8	90	0.0484145	TRUE	Endometrium
Med12	8	61	0.000121983	TRUE	Endometrium
Ribosomal_L39	8	86	0.0314272	TRUE	Endometrium
Ribosomal_S6	8	95	0.0760967	TRUE	Endometrium
Sorb	8	98	0.0956375	TRUE	Endometrium
SRI	8	95	0.0760967	TRUE	Endometrium
Synaptonemal_3	8	86	0.0314272	TRUE	Endometrium
TMEM213	8	83	0.0213157	TRUE	Endometrium
Urm1	8	96	0.0827121	TRUE	Endometrium
VGCC_alpha2	8	94	0.069376	TRUE	Endometrium
Alba	7	65	0.00503071	TRUE	Endometrium
CBFB_NFYA	7	57	0.000486838	TRUE	Endometrium
P53_TAD	7	25	6.62851e-17	TRUE	Endometrium
Wbp11	7	83	0.0751431	TRUE	Endometrium
zf-CCHC_2	7	32	6.44491e-12	TRUE	Endometrium
Beta-TrCP_D	6	40	3.85653e-06	TRUE	Endometrium
COX6C	6	73	0.0913733	TRUE	Endometrium
DUF4514	6	61	0.0169444	TRUE	Endometrium
DUF4560	6	65	0.0339797	TRUE	Endometrium
KLRAQ	6	52	0.0015486	TRUE	Endometrium
Matrilin_ccoil	6	47	0.00020804	TRUE	Endometrium
MR_MLE	6	72	0.0827121	TRUE	Endometrium
Rad50_zn_hook	6	56	0.00540319	TRUE	Endometrium
Somatostatin	6	36	1.68904e-07	TRUE	Endometrium
SRRM_C	6	70	0.0655143	TRUE	Endometrium
Topo_C_assoc	6	72	0.0827121	TRUE	Endometrium
TRAM1	6	71	0.0738683	TRUE	Endometrium
Tubulin-binding	6	63	0.0238758	TRUE	Endometrium
ATP_synt_H	5	45	0.00296117	TRUE	Endometrium
HNH	5	43	0.00133588	TRUE	Endometrium
RNA_pol_Rpb6	5	52	0.0218314	TRUE	Endometrium
UIM	5	54	0.0329623	TRUE	Endometrium
zf-RING_4	5	48	0.00800916	TRUE	Endometrium
Bim_N	4	37	0.00474946	TRUE	Endometrium
LRR_1	4	44	0.0389974	TRUE	Endometrium
Neugrin	4	41	0.0187089	TRUE	Endometrium
Pax7	4	46	0.058786	TRUE	Endometrium
Skp1_POZ	4	44	0.0389974	TRUE	Endometrium
Tantalus	4	40	0.0133493	TRUE	Endometrium
TMEM107	4	26	1.96704e-06	TRUE	Endometrium
Tower	4	42	0.0238758	TRUE	Endometrium
Cohesin_HEAT	3	28	0.00540319	TRUE	Endometrium
RCC1_2	3	30	0.0133493	TRUE	Endometrium
Rhodopsin_N	3	36	0.0827121	TRUE	Endometrium
RNase_H	3	33	0.0389974	TRUE	Endometrium
SAMP	3	21	1.52102e-05	TRUE	Endometrium
zf-U1	3	37	0.0998583	TRUE	Endometrium
Bombesin	2	14	1.52102e-05	TRUE	Endometrium
Drf_DAD	2	15	7.69866e-05	TRUE	Endometrium
Hist_rich_Ca-bd	2	15	7.69866e-05	TRUE	Endometrium
Lsm_interact	2	21	0.0238758	TRUE	Endometrium
NMU	2	24	0.0827121	TRUE	Endometrium
RII_binding_1	2	18	0.00296117	TRUE	Endometrium
TOH_N	2	19	0.00668474	TRUE	Endometrium
YL1_C	2	23	0.058786	TRUE	Endometrium
G-alpha	583	1053	3.51622e-92	TRUE	Eye
Pkinase_Tyr	118	1743	0.000183784	TRUE	Eye
Peptidase_C12	118	214	3.51622e-92	TRUE	Eye
RB_A	78	266	9.80096e-40	TRUE	Eye
P53	45	305	7.66018e-15	TRUE	Eye
Ras	41	484	9.74753e-07	TRUE	Eye
WD40	16	217	3.13238e-05	TRUE	Eye
DUF3452	13	125	1.80767e-09	TRUE	Eye
DSPc	9	127	7.36114e-05	TRUE	Eye
eIF-1a	6	64	4.51361e-08	TRUE	Eye
Ig_3	4	84	0.0219566	TRUE	Eye
zf-C4	3	70	0.052965	TRUE	Eye
TSP_1	2	50	0.0841953	TRUE	Eye
UBA	2	38	0.00798337	TRUE	Eye
VHL	3006	255	6.70951e-152	TRUE	Kidney
P53	1411	699	6.70951e-152	TRUE	Kidney
zf-H2C2_2	1137	18796	0.00824622	TRUE	Kidney
Bromodomain	813	2345	2.28102e-40	TRUE	Kidney
BAH	378	1303	3.48787e-32	TRUE	Kidney
WD40	304	7010	0.0921913	TRUE	Kidney
SET	220	4415	0.040445	TRUE	Kidney
UPF0640	209	124	6.70951e-152	TRUE	Kidney
WT1	182	426	4.77161e-54	TRUE	Kidney
Homeobox	171	3332	0.032388	TRUE	Kidney
Ribonuclease_3	165	579	2.44844e-31	TRUE	Kidney
KRAB	147	2863	0.0322581	TRUE	Kidney
Peptidase_C12	131	631	1.95658e-21	TRUE	Kidney
WTX	125	1045	6.23104e-09	TRUE	Kidney
HMG_box	110	1341	0.000133414	TRUE	Kidney
Nebulin	110	1040	2.88318e-07	TRUE	Kidney
JmjC	101	1778	0.014793	TRUE	Kidney
HLH	98	1325	0.000740924	TRUE	Kidney
zf-C2H2	95	1143	0.000108747	TRUE	Kidney
dsrm	92	1292	0.00122025	TRUE	Kidney
MIP	86	1685	0.0339031	TRUE	Kidney
EGF	83	1516	0.0199389	TRUE	Kidney
Keratin_B2_2	83	1565	0.0258415	TRUE	Kidney
PHD	64	1208	0.0260325	TRUE	Kidney
PLU-1	64	1323	0.0484286	TRUE	Kidney
PTEN_C2	63	677	1.05311e-05	TRUE	Kidney
RasGEF_N	62	921	0.00246199	TRUE	Kidney
Ank	59	1020	0.0126391	TRUE	Kidney
SH3_1	57	1198	0.0538482	TRUE	Kidney
Arm	56	777	0.00100653	TRUE	Kidney
Gla	55	232	3.29853e-25	TRUE	Kidney
SRI	53	95	1.35855e-75	TRUE	Kidney
Plectin	51	605	8.2067e-05	TRUE	Kidney
Furin-like	50	964	0.0299178	TRUE	Kidney
SH3_9	50	1130	0.0819425	TRUE	Kidney
Myc_N	48	619	0.000350631	TRUE	Kidney
GVQW	46	386	7.01035e-09	TRUE	Kidney
Hamartin	42	718	0.0112942	TRUE	Kidney
MHC_II_beta	42	377	5.77206e-08	TRUE	Kidney
Lipase_GDSL	41	816	0.0381897	TRUE	Kidney
ATG_C	39	381	9.00456e-07	TRUE	Kidney
zf-HC5HC2H	32	580	0.0184963	TRUE	Kidney
zf-piccolo	31	61	1.53892e-67	TRUE	Kidney
Integrin_B_tail	30	339	3.17442e-05	TRUE	Kidney
CLN5	29	662	0.0870605	TRUE	Kidney
WW	28	480	0.0116283	TRUE	Kidney
CENP-N	27	337	0.00019984	TRUE	Kidney
FERM_C	27	610	0.0817746	TRUE	Kidney
DUF1220	25	334	0.000617309	TRUE	Kidney
DUF3518	25	514	0.0469757	TRUE	Kidney
zf-FCS	25	336	0.000679236	TRUE	Kidney
DUF3384	24	422	0.0146541	TRUE	Kidney
EFG_IV	23	367	0.00569593	TRUE	Kidney
UBA	23	335	0.00199878	TRUE	Kidney
CENP-P	22	177	1.38275e-09	TRUE	Kidney
DARPP-32	22	407	0.0223218	TRUE	Kidney
EF-hand_2	22	369	0.00927857	TRUE	Kidney
TPR_1	21	360	0.0116283	TRUE	Kidney
Tuberin	21	355	0.00994372	TRUE	Kidney
zf-C5HC2	21	54	3.12311e-47	TRUE	Kidney
EST1	20	231	4.70232e-05	TRUE	Kidney
MBD	20	261	0.000404893	TRUE	Kidney
Seipin	20	270	0.00072532	TRUE	Kidney
zf-C3HC4_2	20	388	0.0311772	TRUE	Kidney
DUF3588	19	235	0.000160332	TRUE	Kidney
Syndecan	19	134	4.91878e-12	TRUE	Kidney
zf-Di19	19	180	2.97835e-07	TRUE	Kidney
DUF4662	18	263	0.00206526	TRUE	Kidney
F-box-like	18	420	0.0981644	TRUE	Kidney
Ferritin	18	372	0.0483612	TRUE	Kidney
IQ	18	272	0.00316356	TRUE	Kidney
Kazal_2	18	419	0.0969624	TRUE	Kidney
RyR	18	380	0.0555501	TRUE	Kidney
SNF5	18	196	1.36397e-05	TRUE	Kidney
zf-RanBP	18	269	0.00270935	TRUE	Kidney
CENP-H	17	106	1.02959e-14	TRUE	Kidney
JmjN	17	103	1.58162e-15	TRUE	Kidney
Pkinase_C	17	354	0.0503794	TRUE	Kidney
zf-C3HC4_4	17	382	0.0790657	TRUE	Kidney
zf-met	17	248	0.00203216	TRUE	Kidney
Cactin_mid	16	190	8.40228e-05	TRUE	Kidney
Cylicin_N	16	170	7.84843e-06	TRUE	Kidney
fn1	16	265	0.00838119	TRUE	Kidney
Gal_Lectin	16	329	0.0470083	TRUE	Kidney
PNK3P	16	147	1.52436e-07	TRUE	Kidney
Pre-SET	16	320	0.0395206	TRUE	Kidney
Ribosomal_L2_C	16	243	0.00336923	TRUE	Kidney
Titin_Z	16	113	5.11758e-12	TRUE	Kidney
DUF1370	15	185	0.000155058	TRUE	Kidney
FNIP_N	15	332	0.0734348	TRUE	Kidney
MHC_II_alpha	15	329	0.0700343	TRUE	Kidney
zf-CXXC	15	189	0.000243731	TRUE	Kidney
BCAS2	14	218	0.00437991	TRUE	Kidney
DUF2045	14	239	0.0111267	TRUE	Kidney
FATC	14	99	5.29709e-12	TRUE	Kidney
FYRC	14	261	0.0237486	TRUE	Kidney
Metallothio	14	244	0.0136041	TRUE	Kidney
PAP_assoc	14	224	0.00589366	TRUE	Kidney
SelP_N	14	229	0.00748794	TRUE	Kidney
Skp1_POZ	14	44	4.53066e-36	TRUE	Kidney
WSC	14	163	5.25724e-05	TRUE	Kidney
zf-C2H2_4	14	216	0.00400826	TRUE	Kidney
Abhydro_lipase	13	88	6.80092e-13	TRUE	Kidney
AXH	13	115	4.25553e-08	TRUE	Kidney
DHDPS	13	303	0.0976102	TRUE	Kidney
zf-UBR	13	213	0.00760841	TRUE	Kidney
API5	12	79	1.38352e-13	TRUE	Kidney
Dak2	12	174	0.00190377	TRUE	Kidney
Defensin_beta_2	12	245	0.0450968	TRUE	Kidney
DOT1	12	203	0.0100288	TRUE	Kidney
Fox-1_C	12	183	0.00353636	TRUE	Kidney
GFO_IDH_MocA	12	236	0.0349325	TRUE	Kidney
MAGUK_N_PEST	12	226	0.0256257	TRUE	Kidney
MHC_I_C	12	79	1.38352e-13	TRUE	Kidney
Ribonucleas_3_3	12	115	5.24362e-07	TRUE	Kidney
Ribosomal_S4	12	102	9.68273e-09	TRUE	Kidney
RPEL	12	156	0.0003874	TRUE	Kidney
TMEM51	12	235	0.0337673	TRUE	Kidney
zf-C2H2_6	12	240	0.0395206	TRUE	Kidney
zf-C2HC	12	84	3.85138e-12	TRUE	Kidney
Adhes-Ig_like	11	112	2.829e-06	TRUE	Kidney
BRK	11	184	0.00908597	TRUE	Kidney
DUF3733	11	243	0.0727173	TRUE	Kidney
EF-hand_6	11	217	0.0357754	TRUE	Kidney
HARE-HTH	11	145	0.000477358	TRUE	Kidney
LRRNT	11	201	0.0200174	TRUE	Kidney
OSCP	11	115	4.71539e-06	TRUE	Kidney
SAB	11	98	4.99368e-08	TRUE	Kidney
B9-C2	10	183	0.0202962	TRUE	Kidney
BK_channel_a	10	198	0.0367817	TRUE	Kidney
CCDC92	10	187	0.0243147	TRUE	Kidney
DIM1	10	103	3.65565e-06	TRUE	Kidney
DZR	10	116	5.00195e-05	TRUE	Kidney
Glyco_transf_25	10	185	0.0223218	TRUE	Kidney
HDAC4_Gln	10	181	0.0182371	TRUE	Kidney
HpcH_HpaI	10	229	0.0886729	TRUE	Kidney
IL34	10	163	0.00723638	TRUE	Kidney
Lig_chan-Glu_bd	10	196	0.0340009	TRUE	Kidney
Pou	10	207	0.048792	TRUE	Kidney
SapB_2	10	70	3.85138e-12	TRUE	Kidney
SPC12	10	68	7.67606e-13	TRUE	Kidney
CDI	9	47	4.47979e-19	TRUE	Kidney
CHDNT	9	165	0.0206361	TRUE	Kidney
FRG1	9	190	0.0555501	TRUE	Kidney
Preseq_ALAS	9	180	0.0395206	TRUE	Kidney
Ribosomal_S6	9	95	6.28838e-06	TRUE	Kidney
Adipogenin	8	80	1.52872e-06	TRUE	Kidney
AKNA	8	108	0.00072532	TRUE	Kidney
Condensin2nSMC	8	154	0.0296342	TRUE	Kidney
Crisp	8	55	1.26728e-12	TRUE	Kidney
DUF2075	8	139	0.0132373	TRUE	Kidney
DUF2431	8	171	0.0602898	TRUE	Kidney
DUF4548	8	166	0.0494362	TRUE	Kidney
EF-hand_3	8	99	0.000161319	TRUE	Kidney
FISNA	8	74	1.84765e-07	TRUE	Kidney
hEGF	8	78	8.6205e-07	TRUE	Kidney
Myelin_MBP	8	182	0.0853243	TRUE	Kidney
NDUFA12	8	111	0.00100653	TRUE	Kidney
PLAC	8	134	0.00918237	TRUE	Kidney
Rotamase_3	8	61	1.70608e-10	TRUE	Kidney
SbcCD_C	8	158	0.0360904	TRUE	Kidney
Serine_rich	8	157	0.0343508	TRUE	Kidney
Stork_head	8	140	0.0140904	TRUE	Kidney
Telomerase_RBD	8	137	0.0115032	TRUE	Kidney
Trefoil	8	85	7.84843e-06	TRUE	Kidney
TSP_3	8	168	0.0535278	TRUE	Kidney
zf-CCCH	8	105	0.000432132	TRUE	Kidney
COX7a	7	161	0.0908871	TRUE	Kidney
DUF4500	7	130	0.0230372	TRUE	Kidney
DUF4523	7	135	0.0299718	TRUE	Kidney
EGF_3	7	146	0.050904	TRUE	Kidney
FDF	7	128	0.0201502	TRUE	Kidney
FTCD	7	145	0.0489763	TRUE	Kidney
GATA	7	143	0.0452536	TRUE	Kidney
Mpv17_PMP22	7	133	0.0272449	TRUE	Kidney
PAH	7	109	0.00437991	TRUE	Kidney
PI3K_p85B	7	156	0.0759948	TRUE	Kidney
SYS1	7	74	6.64632e-06	TRUE	Kidney
TAN	7	162	0.0940252	TRUE	Kidney
TPR_2	7	95	0.000779781	TRUE	Kidney
zf-MYND	7	160	0.0877195	TRUE	Kidney
CBFD_NFYB_HMF	6	128	0.0595473	TRUE	Kidney
CLU_N	6	76	0.000268148	TRUE	Kidney
DCP1	6	123	0.0461916	TRUE	Kidney
DUF2475	6	131	0.0683165	TRUE	Kidney
DUF872	6	65	1.24381e-05	TRUE	Kidney
dUTPase	6	93	0.00419473	TRUE	Kidney
EGF_2	6	117	0.0325945	TRUE	Kidney
HEAT	6	93	0.00419473	TRUE	Kidney
IGFBP	6	107	0.0163213	TRUE	Kidney
Man-6-P_recep	6	132	0.0711729	TRUE	Kidney
MORN	6	65	1.24381e-05	TRUE	Kidney
Neugrin	6	41	8.61744e-13	TRUE	Kidney
NHL	6	114	0.0272449	TRUE	Kidney
OGG_N	6	117	0.0325945	TRUE	Kidney
OSR1_C	6	38	2.31038e-14	TRUE	Kidney
PDEase_I_N	6	61	2.72198e-06	TRUE	Kidney
PDZ_assoc	6	130	0.0654272	TRUE	Kidney
PPAK	6	83	0.00097585	TRUE	Kidney
Rep_fac_C	6	128	0.0595473	TRUE	Kidney
RESP18	6	112	0.0239848	TRUE	Kidney
Ribosomal_L44	6	126	0.0535278	TRUE	Kidney
Synaptobrevin	6	58	6.94299e-07	TRUE	Kidney
Telomere_Sde2	6	137	0.0871887	TRUE	Kidney
Tubulin-binding	6	94	0.00462485	TRUE	Kidney
UPF0016	6	126	0.0535278	TRUE	Kidney
VGCC_beta4Aa_N	6	84	0.00115342	TRUE	Kidney
WIF	6	136	0.0834497	TRUE	Kidney
z-alpha	6	132	0.0711729	TRUE	Kidney
ASL_C2	5	70	0.00115342	TRUE	Kidney
Dpy-30	5	84	0.00939375	TRUE	Kidney
DUF3250	5	106	0.0571565	TRUE	Kidney
FA	5	95	0.0272449	TRUE	Kidney
GoLoco	5	46	1.58928e-07	TRUE	Kidney
GYF	5	56	2.54896e-05	TRUE	Kidney
IRK_N	5	45	6.04617e-08	TRUE	Kidney
WH2	5	59	7.20062e-05	TRUE	Kidney
zf-H2C2_5	5	74	0.0023356	TRUE	Kidney
zf-RING_4	5	48	5.58527e-07	TRUE	Kidney
4F5	4	38	3.52192e-07	TRUE	Kidney
Alveol-reg_P311	4	33	3.45749e-09	TRUE	Kidney
APC_15aa	4	48	0.000103799	TRUE	Kidney
AT_hook	4	26	8.79755e-14	TRUE	Kidney
CCSMST1	4	76	0.0272449	TRUE	Kidney
Cg6151-P	4	40	1.52872e-06	TRUE	Kidney
DNA_pol_delta_4	4	74	0.0223218	TRUE	Kidney
FOP_dimer	4	57	0.00153353	TRUE	Kidney
GTPase_binding	4	42	5.0292e-06	TRUE	Kidney
HHH	4	60	0.00286159	TRUE	Kidney
IKKbetaNEMObind	4	38	3.52192e-07	TRUE	Kidney
LEM	4	68	0.0106218	TRUE	Kidney
LsmAD	4	70	0.0140904	TRUE	Kidney
Macscav_rec	4	49	0.00014244	TRUE	Kidney
Med12	4	61	0.00353636	TRUE	Kidney
Mit_proteolip	4	58	0.00190377	TRUE	Kidney
OCD_Mu_crystall	4	90	0.0796692	TRUE	Kidney
OGFr_III	4	20	1.99135e-20	TRUE	Kidney
Opiods_neuropep	4	23	1.23632e-16	TRUE	Kidney
PACT_coil_coil	4	83	0.0494362	TRUE	Kidney
PAPA-1	4	50	0.000206739	TRUE	Kidney
PEX-2N	4	84	0.0535278	TRUE	Kidney
Proteasome_A_N	4	46	4.40073e-05	TRUE	Kidney
PUA	4	78	0.0325945	TRUE	Kidney
RBD-FIP	4	89	0.0753971	TRUE	Kidney
RBM1CTR	4	90	0.0796692	TRUE	Kidney
Ribosomal_S24e	4	86	0.0625044	TRUE	Kidney
SnAC	4	69	0.012375	TRUE	Kidney
SRF-TF	4	51	0.000298399	TRUE	Kidney
SUZ-C	4	67	0.00918237	TRUE	Kidney
TGF_beta_GS	4	71	0.0157695	TRUE	Kidney
TPR_7	4	36	6.04617e-08	TRUE	Kidney
UPF0004	4	89	0.0753971	TRUE	Kidney
UPF0449	4	62	0.00419473	TRUE	Kidney
zf-CCHC	4	72	0.0174134	TRUE	Kidney
APP_amyloid	3	53	0.0152137	TRUE	Kidney
BH4	3	27	6.04617e-08	TRUE	Kidney
Crystallin	3	56	0.0239848	TRUE	Kidney
DMPK_coil	3	61	0.0439953	TRUE	Kidney
DUF1154	3	47	0.00462485	TRUE	Kidney
DUF2373	3	65	0.0654272	TRUE	Kidney
DUF4587	3	41	0.000851732	TRUE	Kidney
EAF	3	55	0.0206361	TRUE	Kidney
EF-hand_5	3	52	0.0129509	TRUE	Kidney
Endothelin	3	60	0.0395206	TRUE	Kidney
Inhibitor_Mig-6	3	68	0.0834497	TRUE	Kidney
JTB	3	69	0.0908871	TRUE	Kidney
KASH	3	57	0.0272449	TRUE	Kidney
KCl_Cotrans_1	3	30	1.52872e-06	TRUE	Kidney
NDUF_C2	3	57	0.0272449	TRUE	Kidney
OAR	3	41	0.000851732	TRUE	Kidney
P53_tetramer	3	42	0.00115342	TRUE	Kidney
PAM2	3	35	5.39846e-05	TRUE	Kidney
RCC1_2	3	30	1.52872e-06	TRUE	Kidney
S1-like	3	58	0.0304203	TRUE	Kidney
SH3_3	3	69	0.0908871	TRUE	Kidney
Smoothelin	3	55	0.0206361	TRUE	Kidney
TBP-binding	3	66	0.0711729	TRUE	Kidney
TPK_B1_binding	3	68	0.0834497	TRUE	Kidney
UCR_TM	3	67	0.0767894	TRUE	Kidney
zf-C2H2_jaz	3	56	0.0239848	TRUE	Kidney
AGTRAP	2	32	0.00589366	TRUE	Kidney
Calponin	2	46	0.0908871	TRUE	Kidney
Clathrin_propel	2	32	0.00589366	TRUE	Kidney
Defensin_beta	2	36	0.0174134	TRUE	Kidney
DUF1126	2	33	0.0081111	TRUE	Kidney
EF-1_beta_acid	2	26	0.0003874	TRUE	Kidney
eIF-6	2	42	0.0535278	TRUE	Kidney
EZH2_WD-Binding	2	30	0.00286159	TRUE	Kidney
HnRNPA1	2	37	0.0223218	TRUE	Kidney
Hormone_2	2	28	0.00115342	TRUE	Kidney
Hormone_3	2	36	0.0174134	TRUE	Kidney
INCENP_N	2	38	0.0272449	TRUE	Kidney
LRRCT	2	26	0.0003874	TRUE	Kidney
P68HR	2	33	0.0081111	TRUE	Kidney
PHD_2	2	36	0.0174134	TRUE	Kidney
PPR_3	2	34	0.0106218	TRUE	Kidney
PPTA	2	29	0.00190377	TRUE	Kidney
PQQ	2	33	0.0081111	TRUE	Kidney
Prenyltrans	2	44	0.0711729	TRUE	Kidney
Propeptide_C1	2	41	0.0461916	TRUE	Kidney
RPA_interact_N	2	42	0.0535278	TRUE	Kidney
SERTA	2	37	0.0223218	TRUE	Kidney
Surfac_D-trimer	2	46	0.0908871	TRUE	Kidney
TACI-CRD2	2	37	0.0223218	TRUE	Kidney
Tower	2	42	0.0535278	TRUE	Kidney
TPR_10	2	42	0.0535278	TRUE	Kidney
UBA_4	2	45	0.0796692	TRUE	Kidney
UBA_e1_thiolCys	2	45	0.0796692	TRUE	Kidney
WRW	2	39	0.0325945	TRUE	Kidney
Xin	2	32	0.00589366	TRUE	Kidney
YL1_C	2	30	0.00286159	TRUE	Kidney
zf-C2H2_3	2	41	0.0461916	TRUE	Kidney
zf-CCHH	2	26	0.0003874	TRUE	Kidney
zf-HIT	2	30	0.00286159	TRUE	Kidney
Integrin_alpha	1	15	0.00286159	TRUE	Kidney
ITAM	1	21	0.0535278	TRUE	Kidney
LRR_1	1	22	0.0711729	TRUE	Kidney
MAP1B_neuraxin	1	17	0.0106218	TRUE	Kidney
Somatostatin	1	18	0.0174134	TRUE	Kidney
zf-NF-X1	1	20	0.0395206	TRUE	Kidney
Ras	22094	23184	4.00457e-26	TRUE	Large_Intestine
P53	11436	878	5.6014e-28	TRUE	Large_Intestine
Pkinase_Tyr	8639	33738	0.0163727	TRUE	Large_Intestine
PI3Ka	1560	1896	1.57668e-20	TRUE	Large_Intestine
Nebulin	863	3858	0.0651865	TRUE	Large_Intestine
MH2	814	1668	9.00224e-09	TRUE	Large_Intestine
Plectin	728	1960	2.61895e-05	TRUE	Large_Intestine
APC_crr	691	261	5.6014e-28	TRUE	Large_Intestine
CTNNB1_binding	598	1147	8.02507e-10	TRUE	Large_Intestine
WTX	545	1208	1.21453e-07	TRUE	Large_Intestine
MIR	444	1910	0.045759	TRUE	Large_Intestine
MutS_V	428	1214	8.60471e-05	TRUE	Large_Intestine
Furin-like	426	1372	0.00104061	TRUE	Large_Intestine
MH1	390	1362	0.00378577	TRUE	Large_Intestine
Gla	386	685	3.59748e-11	TRUE	Large_Intestine
CLN5	292	662	2.43342e-07	TRUE	Large_Intestine
DUF3451	288	1332	0.0865812	TRUE	Large_Intestine
FRG1	277	190	5.6014e-28	TRUE	Large_Intestine
ecTbetaR2	261	119	5.6014e-28	TRUE	Large_Intestine
PTEN_C2	259	957	0.00828617	TRUE	Large_Intestine
OSCP	258	323	1.27019e-19	TRUE	Large_Intestine
DUF3513	212	998	0.0993849	TRUE	Large_Intestine
MYT1	203	935	0.0835716	TRUE	Large_Intestine
PI3K_p85B	197	234	2.08046e-21	TRUE	Large_Intestine
EF-hand_3	188	470	4.07381e-06	TRUE	Large_Intestine
Lig_chan-Glu_bd	168	588	0.00391232	TRUE	Large_Intestine
CENP-P	166	177	1.86135e-25	TRUE	Large_Intestine
DUF3583	165	332	4.55908e-09	TRUE	Large_Intestine
APG5	161	311	1.00775e-09	TRUE	Large_Intestine
MutS_II	160	615	0.0136809	TRUE	Large_Intestine
RB_A	160	653	0.0270966	TRUE	Large_Intestine
Syndecan	158	555	0.00411967	TRUE	Large_Intestine
tRNA-synt_1e	157	715	0.0762218	TRUE	Large_Intestine
Caldesmon	155	653	0.0375891	TRUE	Large_Intestine
Clathrin_lg_ch	152	611	0.0226927	TRUE	Large_Intestine
Androgen_recep	145	444	0.000414369	TRUE	Large_Intestine
Stork_head	145	189	2.72842e-18	TRUE	Large_Intestine
Nrap	138	497	0.00587792	TRUE	Large_Intestine
Titin_Z	136	324	1.08003e-06	TRUE	Large_Intestine
zf-CXXC	136	553	0.0260208	TRUE	Large_Intestine
Ago_hook	133	580	0.0523139	TRUE	Large_Intestine
zf-C2HC	131	604	0.0843263	TRUE	Large_Intestine
MHC_II_beta	129	582	0.0706544	TRUE	Large_Intestine
HNF-1B_C	126	414	0.00145599	TRUE	Large_Intestine
DUF3371	121	546	0.0707558	TRUE	Large_Intestine
Fox-1_C	121	479	0.0193543	TRUE	Large_Intestine
AKNA	118	214	8.82872e-11	TRUE	Large_Intestine
CitMHS	111	417	0.0102237	TRUE	Large_Intestine
MRP	110	201	1.24408e-10	TRUE	Large_Intestine
DUF4455	109	474	0.0509631	TRUE	Large_Intestine
FAM104	108	222	9.82239e-09	TRUE	Large_Intestine
Abhydro_lipase	106	404	0.0123093	TRUE	Large_Intestine
G6PD_C	104	475	0.0779303	TRUE	Large_Intestine
DUF3608	102	272	2.16418e-05	TRUE	Large_Intestine
CHD5	99	387	0.0165858	TRUE	Large_Intestine
DAG_kinase_N	97	406	0.0351299	TRUE	Large_Intestine
TAFA	94	421	0.066291	TRUE	Large_Intestine
DSPn	91	377	0.0314323	TRUE	Large_Intestine
SWIB	91	348	0.0128551	TRUE	Large_Intestine
APC_15aa	90	64	9.8977e-28	TRUE	Large_Intestine
Cylicin_N	90	279	0.000524228	TRUE	Large_Intestine
UvrD-helicase	85	377	0.0604576	TRUE	Large_Intestine
HbrB	84	216	8.68423e-06	TRUE	Large_Intestine
CENP-N	83	337	0.0255956	TRUE	Large_Intestine
GTPase_binding	82	108	5.21008e-18	TRUE	Large_Intestine
DIM1	76	236	0.000542657	TRUE	Large_Intestine
hEGF	76	273	0.00566238	TRUE	Large_Intestine
TORC_C	75	228	0.000365461	TRUE	Large_Intestine
SAB	72	297	0.0301856	TRUE	Large_Intestine
WBP-1	72	314	0.0523368	TRUE	Large_Intestine
ATP_Ca_trans_C	71	321	0.0719052	TRUE	Large_Intestine
BCL9	70	81	2.91303e-22	TRUE	Large_Intestine
VGLL4	70	220	0.000672941	TRUE	Large_Intestine
Acylphosphatase	69	178	9.53487e-06	TRUE	Large_Intestine
DUF829	69	156	2.22209e-07	TRUE	Large_Intestine
F_actin_cap_B	69	225	0.00125774	TRUE	Large_Intestine
SAMP	66	62	1.5481e-27	TRUE	Large_Intestine
DUF4471	65	294	0.0721615	TRUE	Large_Intestine
Ribosomal_L22e	62	277	0.064824	TRUE	Large_Intestine
OGFr_III	61	120	2.01043e-09	TRUE	Large_Intestine
API5	60	79	5.1366e-18	TRUE	Large_Intestine
M16C_assoc	60	249	0.0319287	TRUE	Large_Intestine
NDUF_C2	58	57	1.83557e-27	TRUE	Large_Intestine
SRF-TF	58	255	0.0562037	TRUE	Large_Intestine
Tmemb_14	58	267	0.0831818	TRUE	Large_Intestine
DUF2431	57	241	0.0389432	TRUE	Large_Intestine
hSH3	57	246	0.0473226	TRUE	Large_Intestine
NOD	57	171	0.000275442	TRUE	Large_Intestine
NR_Repeat	57	192	0.00216151	TRUE	Large_Intestine
Ribosomal_S6	57	95	2.34615e-12	TRUE	Large_Intestine
Rotamase_3	57	172	0.000315144	TRUE	Large_Intestine
SNF5	57	196	0.00296649	TRUE	Large_Intestine
Ca_chan_IQ	56	243	0.0499319	TRUE	Large_Intestine
NHR2	56	201	0.00559717	TRUE	Large_Intestine
UPF0449	56	62	5.37006e-24	TRUE	Large_Intestine
VGCC_beta4Aa_N	56	254	0.0738183	TRUE	Large_Intestine
PDEase_I_N	55	183	0.00178262	TRUE	Large_Intestine
DZR	54	165	0.000399989	TRUE	Large_Intestine
TrmE_N	53	227	0.0437886	TRUE	Large_Intestine
CLU	50	222	0.0610938	TRUE	Large_Intestine
DUF2392	50	101	5.22792e-09	TRUE	Large_Intestine
SnAC	50	139	5.65744e-05	TRUE	Large_Intestine
zf-RING_6	49	140	0.000103375	TRUE	Large_Intestine
DUF3544	46	211	0.0805644	TRUE	Large_Intestine
DUF1087	44	130	0.000208916	TRUE	Large_Intestine
DNA_pol3_delta2	43	171	0.0203501	TRUE	Large_Intestine
MHC_I_C	43	163	0.0114279	TRUE	Large_Intestine
MMPL	43	190	0.0585864	TRUE	Large_Intestine
Churchill	42	65	7.28557e-14	TRUE	Large_Intestine
p53-inducible11	41	158	0.0140965	TRUE	Large_Intestine
OSR1_C	40	181	0.0724141	TRUE	Large_Intestine
Mre11_DNA_bind	38	168	0.0588497	TRUE	Large_Intestine
RMMBL	37	155	0.0354572	TRUE	Large_Intestine
Sox_N	36	163	0.0727786	TRUE	Large_Intestine
HPIP	35	133	0.0118264	TRUE	Large_Intestine
zf-RING_4	35	48	6.9464e-17	TRUE	Large_Intestine
Opiods_neuropep	34	72	2.75163e-08	TRUE	Large_Intestine
Sec8_exocyst	34	121	0.00488775	TRUE	Large_Intestine
UPF0640	34	124	0.00691812	TRUE	Large_Intestine
WRW	34	86	5.74981e-06	TRUE	Large_Intestine
LepA_C	33	108	0.00135264	TRUE	Large_Intestine
NDT80_PhoG	33	148	0.0671068	TRUE	Large_Intestine
DUF500	32	126	0.0181783	TRUE	Large_Intestine
LsmAD	32	139	0.0504254	TRUE	Large_Intestine
Telomerase_RBD	32	137	0.043634	TRUE	Large_Intestine
Pam16	31	100	0.00106764	TRUE	Large_Intestine
DUF4497	30	107	0.00507127	TRUE	Large_Intestine
DUF4523	30	135	0.0691179	TRUE	Large_Intestine
RNA_pol_Rpb6	30	109	0.00660715	TRUE	Large_Intestine
AIF_C	29	131	0.071394	TRUE	Large_Intestine
DUF2367	29	104	0.00552588	TRUE	Large_Intestine
Fra10Ac1	29	118	0.0262203	TRUE	Large_Intestine
Integrin_alpha	29	89	0.000429544	TRUE	Large_Intestine
Per1	29	97	0.00191876	TRUE	Large_Intestine
zf-RNPHF	29	103	0.00475259	TRUE	Large_Intestine
Bclx_interact	28	74	1.73598e-05	TRUE	Large_Intestine
TEX33	28	121	0.0479508	TRUE	Large_Intestine
UPF0016	28	126	0.0691179	TRUE	Large_Intestine
DUF4514	27	61	2.18604e-07	TRUE	Large_Intestine
NuA4	27	82	0.000358854	TRUE	Large_Intestine
ERbeta_N	25	113	0.071757	TRUE	Large_Intestine
DUF3437	24	90	0.0100141	TRUE	Large_Intestine
PIG-H	24	71	0.000214238	TRUE	Large_Intestine
RDM	24	84	0.00391232	TRUE	Large_Intestine
SRRM_C	24	70	0.000155125	TRUE	Large_Intestine
Hormone_3	22	90	0.0277829	TRUE	Large_Intestine
JTB	22	69	0.000650605	TRUE	Large_Intestine
MRI	22	102	0.0883642	TRUE	Large_Intestine
Neugrin	22	41	2.71401e-10	TRUE	Large_Intestine
IRK_N	21	92	0.0545075	TRUE	Large_Intestine
CLU_N	18	76	0.0384219	TRUE	Large_Intestine
TPR_17	17	68	0.0216219	TRUE	Large_Intestine
YL1_C	17	53	0.000585833	TRUE	Large_Intestine
RPA_interact_M	16	49	0.000415319	TRUE	Large_Intestine
Fibrinogen_aC	15	66	0.0565775	TRUE	Large_Intestine
IGF2_C	15	55	0.00738183	TRUE	Large_Intestine
P68HR	15	68	0.0735067	TRUE	Large_Intestine
Endothelin	13	60	0.0850676	TRUE	Large_Intestine
Axin_b-cat_bind	12	38	0.00075425	TRUE	Large_Intestine
P53_TAD	12	25	1.6284e-08	TRUE	Large_Intestine
TP1	12	54	0.0691179	TRUE	Large_Intestine
zf-primase	12	46	0.0132422	TRUE	Large_Intestine
Bim_N	11	37	0.00210571	TRUE	Large_Intestine
DUF4339	11	46	0.0347908	TRUE	Large_Intestine
Sgf11	10	33	0.00156897	TRUE	Large_Intestine
Tower	10	42	0.0364313	TRUE	Large_Intestine
Yos1	8	36	0.0691179	TRUE	Large_Intestine
Neuromodulin_N	7	31	0.0596574	TRUE	Large_Intestine
AT_hook	6	13	5.87015e-08	TRUE	Large_Intestine
P53	4452	878	1.80198e-56	TRUE	Liver
KRAB	1298	10741	0.0678476	TRUE	Liver
Nebulin	343	2191	0.00244376	TRUE	Liver
HNF-1B_C	220	414	2.10714e-24	TRUE	Liver
Gla	172	245	1.09524e-34	TRUE	Liver
IL6Ra-bind	151	983	0.0032539	TRUE	Liver
DUF1220	143	384	3.77437e-14	TRUE	Liver
Filaggrin	134	1066	0.0451591	TRUE	Liver
RB_A	134	653	1.37115e-05	TRUE	Liver
Spy1	125	603	1.06801e-05	TRUE	Liver
zf-C3HC4_4	118	1017	0.0988378	TRUE	Liver
HNF-1_N	115	683	0.000700084	TRUE	Liver
Glutenin_hmw	112	349	3.45929e-11	TRUE	Liver
DUF3496	111	444	1.14926e-07	TRUE	Liver
IQ	107	849	0.0440717	TRUE	Liver
CLN5	99	662	0.00490956	TRUE	Liver
EF-hand_3	97	378	5.52222e-08	TRUE	Liver
Ribosomal_L22	93	242	7.26906e-15	TRUE	Liver
APG5	91	311	1.0424e-09	TRUE	Liver
DUF3384	88	422	8.89762e-06	TRUE	Liver
Apc3	86	160	9.43653e-25	TRUE	Liver
AKNA	85	214	1.0311e-15	TRUE	Liver
FGE-sulfatase	76	524	0.00778619	TRUE	Liver
OSCP	74	323	1.05194e-06	TRUE	Liver
Glyco_hydro_2_C	68	533	0.0389404	TRUE	Liver
KRAP_IP3R_bind	65	549	0.0819121	TRUE	Liver
CENP-P	64	177	1.63262e-13	TRUE	Liver
PPAK	61	412	0.00559397	TRUE	Liver
PABP	56	429	0.0292943	TRUE	Liver
FAM86	55	412	0.0231013	TRUE	Liver
HS1_rep	55	250	2.80903e-06	TRUE	Liver
DUF3608	54	272	2.81845e-05	TRUE	Liver
SSXRD	52	203	5.74089e-08	TRUE	Liver
DUF608	49	368	0.0238156	TRUE	Liver
Cylicin_N	48	279	0.000484053	TRUE	Liver
FAM104	48	222	3.94119e-06	TRUE	Liver
BK_channel_a	46	304	0.00418627	TRUE	Liver
DUF3583	46	332	0.0144468	TRUE	Liver
Abhydro_lipase	44	278	0.00206371	TRUE	Liver
NCD3G	43	366	0.0883974	TRUE	Liver
Vezatin	43	292	0.00617102	TRUE	Liver
WH2	42	228	0.000132532	TRUE	Liver
ALAD	39	326	0.0739498	TRUE	Liver
CDI	39	202	4.97181e-05	TRUE	Liver
SAB	39	199	3.62505e-05	TRUE	Liver
MRP	38	201	7.6825e-05	TRUE	Liver
SapB_1	38	189	2.02348e-05	TRUE	Liver
DIM1	37	236	0.0023929	TRUE	Liver
Noelin-1	37	300	0.0554311	TRUE	Liver
PapD-like	36	170	6.7462e-06	TRUE	Liver
Titin_Z	36	282	0.0386768	TRUE	Liver
HbrB	35	216	0.00136685	TRUE	Liver
Lipocalin_7	34	255	0.0234382	TRUE	Liver
API5	33	79	4.7437e-17	TRUE	Liver
GTPase_binding	33	108	2.09248e-10	TRUE	Liver
Ribosomal_L44	33	205	0.00149035	TRUE	Liver
Stork_head	33	189	0.000357593	TRUE	Liver
Ca_chan_IQ	32	208	0.00315894	TRUE	Liver
DUF2431	32	171	9.12182e-05	TRUE	Liver
Dynactin_p22	30	140	5.08167e-06	TRUE	Liver
OGFr_III	30	120	1.14926e-07	TRUE	Liver
NHR2	29	134	3.88059e-06	TRUE	Liver
OSR1_C	29	107	1.0816e-08	TRUE	Liver
DUF829	28	156	0.000214775	TRUE	Liver
PPP5	28	180	0.00266384	TRUE	Liver
PDEase_I_N	26	183	0.0100358	TRUE	Liver
DZR	25	55	1.89764e-19	TRUE	Liver
hEGF	25	169	0.00568733	TRUE	Liver
OGG_N	25	117	5.48386e-06	TRUE	Liver
RPA_interact_M	24	49	1.00957e-21	TRUE	Liver
TrkA_N	24	205	0.0913478	TRUE	Liver
EFhand_Ca_insen	23	139	0.000970423	TRUE	Liver
LsmAD	23	139	0.000970423	TRUE	Liver
Casc1	22	188	0.0917187	TRUE	Liver
CNRIP1	21	118	0.000259044	TRUE	Liver
cwf18	21	135	0.00266384	TRUE	Liver
FAIM1	21	178	0.0848966	TRUE	Liver
DUF4509	20	164	0.0623131	TRUE	Liver
DUF4510	20	163	0.058583	TRUE	Liver
Glyco_hydro_2	20	102	3.59378e-05	TRUE	Liver
Requiem_N	20	148	0.0196984	TRUE	Liver
Rotamase_3	20	172	0.0970329	TRUE	Liver
UPF0640	20	124	0.00145369	TRUE	Liver
VGCC_beta4Aa_N	20	170	0.0872511	TRUE	Liver
Ribosomal_L30	19	156	0.063094	TRUE	Liver
UPF0449	19	62	1.94348e-10	TRUE	Liver
2Fe-2S_thioredx	18	147	0.0598302	TRUE	Liver
Churchill	18	65	6.0439e-09	TRUE	Liver
DUF1897	18	61	7.38182e-10	TRUE	Liver
DUF500	18	126	0.00938355	TRUE	Liver
NuA4	18	82	2.95444e-06	TRUE	Liver
Ribosomal_S6	18	95	7.39828e-05	TRUE	Liver
UIM	18	126	0.00938355	TRUE	Liver
UPF0016	18	126	0.00938355	TRUE	Liver
zf-RING_6	18	107	0.000708998	TRUE	Liver
TEX33	17	121	0.0120085	TRUE	Liver
TPR_17	17	68	1.14926e-07	TRUE	Liver
CCDC32	16	124	0.0341571	TRUE	Liver
Med25_SD1	16	125	0.0375536	TRUE	Liver
Ribosomal_L31e	16	84	6.71946e-05	TRUE	Liver
SbcCD_C	16	79	1.76138e-05	TRUE	Liver
Adhes-Ig_like	15	112	0.0222	TRUE	Liver
GluR_Homer-bdg	15	102	0.00631694	TRUE	Liver
zf-piccolo	15	122	0.0573319	TRUE	Liver
ATP-synt_F6	14	97	0.0083036	TRUE	Liver
KCNQC3-Ank-G_bd	14	99	0.0108611	TRUE	Liver
LLC1	14	120	0.0942556	TRUE	Liver
Opiods_neuropep	14	72	4.11336e-05	TRUE	Liver
Pax7	14	88	0.00188419	TRUE	Liver
PTS_EIIA_2	14	96	0.0072068	TRUE	Liver
Urm1	14	96	0.0072068	TRUE	Liver
4F5	13	76	0.000542151	TRUE	Liver
DUF2416	13	98	0.0248567	TRUE	Liver
DUF4587	13	99	0.0276614	TRUE	Liver
IRK_N	13	92	0.0109981	TRUE	Liver
YL1_C	13	53	1.84605e-07	TRUE	Liver
ANATO	12	99	0.0660093	TRUE	Liver
Cg6151-P	12	40	4.39605e-10	TRUE	Liver
Ribosomal_S24e	12	86	0.0132132	TRUE	Liver
AT_hook	11	26	2.23044e-17	TRUE	Liver
Axin_b-cat_bind	11	73	0.00444373	TRUE	Liver
DNA_pol_delta_4	11	74	0.00527845	TRUE	Liver
Ribosomal_L23	11	80	0.0157779	TRUE	Liver
Shal-type	11	87	0.0427233	TRUE	Liver
CLU_N	10	76	0.0271039	TRUE	Liver
COX16	10	67	0.00502982	TRUE	Liver
DUF750	10	64	0.00251001	TRUE	Liver
QLQ	10	74	0.0196984	TRUE	Liver
RICTOR_V	10	73	0.0164284	TRUE	Liver
Integrin_alpha	9	75	0.0720955	TRUE	Liver
JTB	9	69	0.029564	TRUE	Liver
WRW	9	39	8.30658e-07	TRUE	Liver
BPS	8	48	0.000832835	TRUE	Liver
DUF4596	8	44	0.000166579	TRUE	Liver
HHH	8	60	0.0234382	TRUE	Liver
HIF-1	8	69	0.0994517	TRUE	Liver
Bclx_interact	7	37	7.59124e-05	TRUE	Liver
KASH	7	56	0.0475031	TRUE	Liver
NDUF_C2	7	57	0.0580473	TRUE	Liver
zf-CCHC_2	7	32	3.18196e-06	TRUE	Liver
BH4	6	27	2.14862e-06	TRUE	Liver
DUF1731	6	49	0.0598302	TRUE	Liver
GST_N_2	6	47	0.0386768	TRUE	Liver
HNH	6	43	0.0132132	TRUE	Liver
P120R	6	43	0.0132132	TRUE	Liver
Tantalus	6	40	0.00472387	TRUE	Liver
zf-DBF	6	49	0.0598302	TRUE	Liver
Neugrin	5	41	0.0623131	TRUE	Liver
Neuromodulin_N	5	31	0.00145369	TRUE	Liver
Sgf11	5	33	0.00410502	TRUE	Liver
WSK	5	31	0.00145369	TRUE	Liver
APC_15aa	4	32	0.0475031	TRUE	Liver
GIT_SHD	4	31	0.0341571	TRUE	Liver
TMEM107	4	26	0.00315894	TRUE	Liver
zf-ribbon_3	4	26	0.00315894	TRUE	Liver
LRR_1	3	23	0.029564	TRUE	Liver
Bombesin	2	14	0.00938355	TRUE	Liver
P53	13408	878	1.08465e-34	TRUE	Lung
Pkinase_Tyr	10463	33450	8.25056e-06	TRUE	Lung
Ras	9502	22026	3.52127e-10	TRUE	Lung
Vinculin	811	4347	0.0177292	TRUE	Lung
FAM47	483	2259	0.00394284	TRUE	Lung
RB_A	474	653	1.24456e-21	TRUE	Lung
PI3Ka	456	1711	0.000184313	TRUE	Lung
Ephrin_lbd	446	2397	0.0182992	TRUE	Lung
Plectin	396	1535	0.000310039	TRUE	Lung
Furin-like	342	1287	0.000193288	TRUE	Lung
Gla	309	441	1.23006e-20	TRUE	Lung
Protocadherin	267	1109	0.000855102	TRUE	Lung
WTX	234	1208	0.0119462	TRUE	Lung
EF-hand_3	226	559	4.5391e-09	TRUE	Lung
Recep_L_domain	225	1436	0.0858449	TRUE	Lung
MYT1	222	935	0.00102258	TRUE	Lung
IQ	203	1183	0.0399779	TRUE	Lung
PNP_UDP_1	183	989	0.0194776	TRUE	Lung
EphA2_TM	164	942	0.0348594	TRUE	Lung
GF_recep_IV	155	816	0.0149397	TRUE	Lung
CLN5	145	662	0.00295884	TRUE	Lung
KRTAP	145	901	0.0689569	TRUE	Lung
DUF676	140	394	3.30382e-07	TRUE	Lung
HIN	131	845	0.0927465	TRUE	Lung
OSCP	124	115	1.09225e-34	TRUE	Lung
zf-CCCH	123	392	7.76438e-06	TRUE	Lung
Cylicin_N	122	279	2.0499e-10	TRUE	Lung
Titin_Z	115	251	2.89302e-11	TRUE	Lung
EF-hand_2	114	732	0.0897902	TRUE	Lung
Syndecan	108	495	0.0030993	TRUE	Lung
Ferritin	101	514	0.0104072	TRUE	Lung
CitMHS	100	417	0.000898925	TRUE	Lung
WT1	98	426	0.00155699	TRUE	Lung
DAG_kinase_N	96	379	0.000402454	TRUE	Lung
KAT11	95	614	0.094028	TRUE	Lung
Androgen_recep	93	444	0.00502426	TRUE	Lung
Lig_chan-Glu_bd	92	588	0.0867709	TRUE	Lung
WSC	89	489	0.0229628	TRUE	Lung
zf-C2HC	86	479	0.0260023	TRUE	Lung
APG5	85	311	0.000120413	TRUE	Lung
LIM_bind	84	410	0.00653914	TRUE	Lung
DUF4589	80	481	0.0522733	TRUE	Lung
DUF3583	74	332	0.00233446	TRUE	Lung
DUF3657	74	121	3.08096e-17	TRUE	Lung
AKNA	73	214	9.91334e-07	TRUE	Lung
Fox-1_C	72	292	0.000600382	TRUE	Lung
PHTB1_C	70	381	0.0209783	TRUE	Lung
PPAK	69	443	0.089713	TRUE	Lung
CENP-P	68	177	2.78811e-08	TRUE	Lung
DUF4546	68	420	0.0659253	TRUE	Lung
Trefoil	64	357	0.0264369	TRUE	Lung
zf-RING_6	60	107	2.54763e-15	TRUE	Lung
DZR	57	110	1.05528e-13	TRUE	Lung
Notch	57	371	0.098958	TRUE	Lung
SWIB	56	272	0.00616701	TRUE	Lung
SSFA2_C	55	339	0.0648764	TRUE	Lung
CoA_transf_3	54	340	0.076985	TRUE	Lung
Noelin-1	54	346	0.0884078	TRUE	Lung
Focal_AT	51	278	0.0212931	TRUE	Lung
DHDPS	50	303	0.0562851	TRUE	Lung
MRP	50	201	0.000535883	TRUE	Lung
DUF2146	44	286	0.0978391	TRUE	Lung
PapD-like	44	276	0.074523	TRUE	Lung
PI3K_p85B	43	234	0.0209397	TRUE	Lung
DOT1	41	203	0.00762168	TRUE	Lung
IQ-like	41	194	0.00455556	TRUE	Lung
NODP	41	254	0.0674437	TRUE	Lung
CPSase_L_D3	40	248	0.0678397	TRUE	Lung
Ca_chan_IQ	39	208	0.0169086	TRUE	Lung
Pcc1	39	210	0.0187009	TRUE	Lung
Stork_head	39	189	0.00599433	TRUE	Lung
Neuromodulin	38	172	0.00264687	TRUE	Lung
Requiem_N	38	222	0.0409404	TRUE	Lung
DIM1	37	103	2.2351e-07	TRUE	Lung
HbrB	37	216	0.0406579	TRUE	Lung
Tubulin-binding	37	190	0.0113776	TRUE	Lung
Crisp	36	165	0.0030993	TRUE	Lung
EFhand_Ca_insen	36	203	0.0295672	TRUE	Lung
HDAC4_Gln	36	181	0.00909342	TRUE	Lung
F_actin_bind	33	213	0.0931645	TRUE	Lung
UPF0640	33	55	8.44676e-17	TRUE	Lung
FISNA	31	146	0.00431003	TRUE	Lung
Rotamase_3	31	172	0.0250131	TRUE	Lung
DUF2392	30	101	2.52683e-05	TRUE	Lung
ecTbetaR2	30	119	0.000437511	TRUE	Lung
P53_TAD	30	25	2.85702e-33	TRUE	Lung
BPS	29	146	0.00923821	TRUE	Lung
Hormone_2	29	168	0.0376773	TRUE	Lung
API5	28	79	3.55892e-07	TRUE	Lung
POT1	28	131	0.00396039	TRUE	Lung
Nuf2	27	124	0.00317197	TRUE	Lung
GTPase_binding	26	108	0.000855872	TRUE	Lung
SSXRD	26	169	0.0978391	TRUE	Lung
DUF2668	25	154	0.0645786	TRUE	Lung
TMEM18	25	123	0.00714358	TRUE	Lung
OGFr_III	24	80	2.10252e-05	TRUE	Lung
SnAC	24	139	0.0375811	TRUE	Lung
LsmAD	23	139	0.054895	TRUE	Lung
Churchill	21	65	3.95887e-06	TRUE	Lung
Dppa2_A	21	135	0.09055	TRUE	Lung
DUF4523	21	135	0.09055	TRUE	Lung
DUF2416	20	98	0.00683489	TRUE	Lung
DUF4590	20	116	0.0381391	TRUE	Lung
IRK_N	20	92	0.00322996	TRUE	Lung
KASH	20	113	0.0301341	TRUE	Lung
MHC_I_C	20	79	0.000406362	TRUE	Lung
Opiods_neuropep	20	72	8.89407e-05	TRUE	Lung
P53_tetramer	20	84	0.000978219	TRUE	Lung
DUF4514	19	61	9.29732e-06	TRUE	Lung
K_channel_TID	19	75	0.000401426	TRUE	Lung
SUZ	19	110	0.037434	TRUE	Lung
Bclx_interact	18	74	0.000740754	TRUE	Lung
IGF2_C	18	55	2.99073e-06	TRUE	Lung
Ribosomal_S6	18	95	0.0153221	TRUE	Lung
SRI	18	95	0.0153221	TRUE	Lung
YHS	18	43	1.09094e-09	TRUE	Lung
CBM_14	17	94	0.0242961	TRUE	Lung
DUF4541	16	91	0.0320352	TRUE	Lung
FATC	16	99	0.066824	TRUE	Lung
LELP1	16	96	0.0512097	TRUE	Lung
WRW	16	39	2.49967e-09	TRUE	Lung
COX7B	15	80	0.0169086	TRUE	Lung
DNA_pol_delta_4	15	74	0.00734832	TRUE	Lung
DUF1897	15	61	0.000620365	TRUE	Lung
Hormone_6	15	94	0.0738877	TRUE	Lung
UPF0449	15	62	0.000800838	TRUE	Lung
BetaGal_dom4_5	14	87	0.0689967	TRUE	Lung
COX6C	14	73	0.0134779	TRUE	Lung
DUF3697	14	33	7.16977e-10	TRUE	Lung
LRR_1	14	90	0.09055	TRUE	Lung
VitD-bind_III	14	68	0.00616701	TRUE	Lung
CXCR4_N	13	33	1.16457e-08	TRUE	Lung
DUF4600	13	82	0.0781705	TRUE	Lung
HnRNPA1	12	75	0.0721357	TRUE	Lung
BH4	11	54	0.00697543	TRUE	Lung
TPK_B1_binding	11	68	0.0663613	TRUE	Lung
VMA21	11	66	0.0512097	TRUE	Lung
FumaraseC_C	10	55	0.0231775	TRUE	Lung
NDUF_C2	10	57	0.0326647	TRUE	Lung
pKID	10	43	0.00136831	TRUE	Lung
PTP_N	10	56	0.0275696	TRUE	Lung
DSS1_SEM1	9	58	0.0921497	TRUE	Lung
Shal-type	9	58	0.0921497	TRUE	Lung
Fip1	8	45	0.0288561	TRUE	Lung
Pax7	8	46	0.0351623	TRUE	Lung
AT_hook	7	13	1.68282e-14	TRUE	Lung
DUF1891	7	37	0.0155503	TRUE	Lung
Neuromodulin_N	6	31	0.0120726	TRUE	Lung
Yae1_N	6	39	0.0978391	TRUE	Lung
Doppel	5	30	0.0512097	TRUE	Lung
TMEM107	5	26	0.0130583	TRUE	Lung
P53	8370	878	1.05054e-74	TRUE	Oesophagus
PI3Ka	277	1711	2.10587e-06	TRUE	Oesophagus
EGF	267	3115	0.0755199	TRUE	Oesophagus
Nebulin	215	1416	9.0134e-06	TRUE	Oesophagus
Ank	144	1459	0.0204449	TRUE	Oesophagus
Plectin	118	779	9.8605e-06	TRUE	Oesophagus
KAT11	97	614	3.52592e-06	TRUE	Oesophagus
CLN5	82	662	0.000720095	TRUE	Oesophagus
GVQW	76	805	0.032444	TRUE	Oesophagus
[truncated: 1,432 more rows]
