# Supplementary material for: DCMP: database of cancer mutant protein domains
Source: Database (Oxford). 2021 Nov 13;2021:baab066. doi: 10.1093/database/baab066 (PMC8607521; doi:10.1093/database/baab066)
Supplement: baab066_Supp [file baab066_supp.zip › supplementary_file5.xlsx]

## Sheet: The list of mutated domains
Pfam_domain	Snp_count	Domain_length	locfdr values	<0.1	cancer_type
IRK	1062	1479	2.70237e-109	TRUE	Adrenal
Pkinase	310	11152	0.291204	FALSE	Adrenal
P53	252	305	4.84146e-129	TRUE	Adrenal
Cadherin	109	4597	0.43418	FALSE	Adrenal
Pkinase_Tyr	81	5370	0.935981	FALSE	Adrenal
Ion_trans	79	3420	0.460073	FALSE	Adrenal
fn3	74	2682	0.296965	FALSE	Adrenal
Ras	64	3079	0.571889	FALSE	Adrenal
zf-H2C2_2	61	1294	0.0265552	TRUE	Adrenal
I-set	58	2293	0.372345	FALSE	Adrenal
7tm_1	51	11170	1	FALSE	Adrenal
G-alpha	50	1439	0.138654	FALSE	Adrenal
Ank_2	49	2403	0.592419	FALSE	Adrenal
VHL	48	156	1.22537e-36	TRUE	Adrenal
Collagen	46	1590	0.259941	FALSE	Adrenal
Cation_ATPase_N	45	69	7.84314e-98	TRUE	Adrenal
E1-E2_ATPase	42	1878	0.491694	FALSE	Adrenal
Spectrin	37	1902	0.646265	FALSE	Adrenal
ANF_receptor	33	5385	1	FALSE	Adrenal
PH	32	1504	0.546643	FALSE	Adrenal
Myosin_head	31	13000	0.942953	FALSE	Adrenal
7tm_4	29	3902	1	FALSE	Adrenal
Hormone_recep	26	1771	0.965054	FALSE	Adrenal
RRM_1	25	1138	0.511536	FALSE	Adrenal
Ig_2	24	1392	0.785651	FALSE	Adrenal
KRAB	22	451	0.0208819	TRUE	Adrenal
PDZ	22	883	0.385507	FALSE	Adrenal
HIF-1	21	35	4.25211e-88	TRUE	Adrenal
WD40	21	610	0.144152	FALSE	Adrenal
C2	20	1226	0.849399	FALSE	Adrenal
p450	20	5585	1	FALSE	Adrenal
LRR_8	19	768	0.39163	FALSE	Adrenal
Sushi	19	632	0.230883	FALSE	Adrenal
Trypsin	19	3299	1	FALSE	Adrenal
Sema	17	3640	1	FALSE	Adrenal
MFS_1	16	4221	1	FALSE	Adrenal
RhoGEF	16	1017	0.889961	FALSE	Adrenal
Sugar_tr	16	3739	1	FALSE	Adrenal
CUB	15	1212	1	FALSE	Adrenal
Filament	15	4701	0.996573	FALSE	Adrenal
Lig_chan	15	1654	1	FALSE	Adrenal
Menin	15	559	0.319917	FALSE	Adrenal
UCH	15	4914	0.994304	FALSE	Adrenal
7tm_2	14	1767	1	FALSE	Adrenal
AMP-binding	14	2705	1	FALSE	Adrenal
EGF_CA	14	411	0.150416	FALSE	Adrenal
Homeobox	14	645	0.524814	FALSE	Adrenal
SNF	13	3171	1	FALSE	Adrenal
VWA	13	1388	1	FALSE	Adrenal
SNF2_N	12	1993	1	FALSE	Adrenal
Helicase_C	11	493	0.494283	FALSE	Adrenal
Hist_deacetyl	11	964	1	FALSE	Adrenal
HLH	11	200	0.00720187	TRUE	Adrenal
Lectin_C	11	855	1	FALSE	Adrenal
RhoGAP	11	912	1	FALSE	Adrenal
Sulfatase	11	2143	1	FALSE	Adrenal
CH	10	558	0.740043	FALSE	Adrenal
DUF1908	10	829	1	FALSE	Adrenal
Filamin	10	455	0.51105	FALSE	Adrenal
Hydrolase	10	1425	1	FALSE	Adrenal
LIM	10	403	0.389034	FALSE	Adrenal
PMP22_Claudin	10	1454	1	FALSE	Adrenal
RB_A	10	266	0.098982	TRUE	Adrenal
RGS	10	533	0.687853	FALSE	Adrenal
SET	10	632	0.883636	FALSE	Adrenal
VWC	10	171	0.0037384	TRUE	Adrenal
Aa_trans	9	1522	1	FALSE	Adrenal
Actin	9	2622	1	FALSE	Adrenal
AF-4	9	4044	0.905716	FALSE	Adrenal
C8	9	359	0.380131	FALSE	Adrenal
Cation_ATPase_C	9	393	0.468556	FALSE	Adrenal
DAGK_cat	9	531	0.805533	FALSE	Adrenal
Daxx	9	740	1	FALSE	Adrenal
RA	9	328	0.301231	FALSE	Adrenal
Septin	9	554	0.85412	FALSE	Adrenal
SH3_1	9	228	0.07868	TRUE	Adrenal
Vinculin	9	1385	1	FALSE	Adrenal
Y_phosphatase	9	588	0.920101	FALSE	Adrenal
Amino_oxidase	8	1646	1	FALSE	Adrenal
Annexin	8	459	0.772961	FALSE	Adrenal
Arf	8	845	1	FALSE	Adrenal
cNMP_binding	8	543	0.961279	FALSE	Adrenal
Exo_endo_phos	8	1840	1	FALSE	Adrenal
His_Phos_2	8	913	1	FALSE	Adrenal
Kinesin	8	1667	1	FALSE	Adrenal
Laminin_G_2	8	733	1	FALSE	Adrenal
Myotub-related	8	1369	1	FALSE	Adrenal
Tcp11	8	1477	1	FALSE	Adrenal
TPR_11	8	337	0.433013	FALSE	Adrenal
TUDOR	8	728	1	FALSE	Adrenal
V-set	8	635	1	FALSE	Adrenal
AAA_9	7	776	1	FALSE	Adrenal
ABC_tran	7	831	1	FALSE	Adrenal
BTB	7	536	1	FALSE	Adrenal
Carn_acyltransf	7	1753	1	FALSE	Adrenal
Cpn60_TCP1	7	2903	0.949076	FALSE	Adrenal
Drf_GBD	7	343	0.591532	FALSE	Adrenal
Dynein_heavy	7	3553	0.843048	FALSE	Adrenal
ECH	7	773	1	FALSE	Adrenal
Kelch_1	7	228	0.216641	FALSE	Adrenal
KH_1	7	253	0.294823	FALSE	Adrenal
LRRNT	7	86	1.66645e-05	TRUE	Adrenal
Mito_carr	7	563	1	FALSE	Adrenal
Myosin_tail_1	7	3434	0.860182	FALSE	Adrenal
Na_H_Exchanger	7	1389	1	FALSE	Adrenal
Neur_chan_memb	7	1020	1	FALSE	Adrenal
PDEase_I	7	715	1	FALSE	Adrenal
Peptidase_M14	7	1383	1	FALSE	Adrenal
PHD	7	99	0.000275609	TRUE	Adrenal
Serpin	7	1816	1	FALSE	Adrenal
SH2	7	393	0.747327	FALSE	Adrenal
SH3_2	7	163	0.0495824	TRUE	Adrenal
zf-RING_2	7	183	0.09091	TRUE	Adrenal
5_nucleotid	6	552	1	FALSE	Adrenal
AAA	6	438	1	FALSE	Adrenal
ABC_membrane	6	1142	1	FALSE	Adrenal
adh_short	6	867	1	FALSE	Adrenal
Alpha_adaptinC2	6	221	0.309379	FALSE	Adrenal
Ank	6	84	0.000236202	TRUE	Adrenal
Anoctamin	6	1177	1	FALSE	Adrenal
Carb_anhydrase	6	1287	1	FALSE	Adrenal
CD36	6	902	1	FALSE	Adrenal
DEAD	6	728	1	FALSE	Adrenal
DSPc	6	550	1	FALSE	Adrenal
DUF3250	6	106	0.00545885	TRUE	Adrenal
EGF	6	93	0.00111108	TRUE	Adrenal
Ets	6	337	0.74783	FALSE	Adrenal
FERM_M	6	254	0.437929	FALSE	Adrenal
Fork_head	6	258	0.453421	FALSE	Adrenal
GDA1_CD39	6	1621	1	FALSE	Adrenal
GDPD	6	664	1	FALSE	Adrenal
Glyco_hydro_31	6	970	1	FALSE	Adrenal
Glycos_transf_2	6	554	1	FALSE	Adrenal
HAD	6	1487	1	FALSE	Adrenal
HCO3_cotransp	6	1029	1	FALSE	Adrenal
Lipocalin	6	394	0.925637	FALSE	Adrenal
Med12-PQL	6	203	0.242935	FALSE	Adrenal
Peptidase_C14	6	607	1	FALSE	Adrenal
Peptidase_M13_N	6	1576	1	FALSE	Adrenal
Plexin_cytopl	6	2186	0.989063	FALSE	Adrenal
Serinc	6	1330	1	FALSE	Adrenal
Sulfate_transp	6	859	1	FALSE	Adrenal
TLE_N	6	307	0.640861	FALSE	Adrenal
UDPGT	6	2503	0.945827	FALSE	Adrenal
7TM_GPCR_Srsx	5	687	1	FALSE	Adrenal
Aldo_ket_red	5	722	1	FALSE	Adrenal
Aminotran_1_2	5	761	1	FALSE	Adrenal
B56	5	955	1	FALSE	Adrenal
BACK	5	309	0.858609	FALSE	Adrenal
Beach	5	802	1	FALSE	Adrenal
CATSPERG	5	941	1	FALSE	Adrenal
Cupin_8	5	945	1	FALSE	Adrenal
Ded_cyto	5	548	1	FALSE	Adrenal
DEP	5	118	0.0536297	TRUE	Adrenal
DUF3583	5	332	0.93767	FALSE	Adrenal
EphA2_TM	5	229	0.518308	FALSE	Adrenal
ERM	5	571	1	FALSE	Adrenal
FH2	5	783	1	FALSE	Adrenal
Fibrinogen_C	5	701	1	FALSE	Adrenal
GBP	5	802	1	FALSE	Adrenal
Gla	5	35	2.86343e-14	TRUE	Adrenal
GTP_EFTU	5	485	1	FALSE	Adrenal
HECT	5	695	1	FALSE	Adrenal
JmjC	5	210	0.430045	FALSE	Adrenal
KCNQ_channel	5	323	0.90777	FALSE	Adrenal
Laminin_EGF	5	150	0.163114	FALSE	Adrenal
Mab-21	5	582	1	FALSE	Adrenal
Macro	5	331	0.934409	FALSE	Adrenal
MCM	5	1024	1	FALSE	Adrenal
Metallophos	5	629	1	FALSE	Adrenal
MIP	5	596	1	FALSE	Adrenal
MT	5	1038	1	FALSE	Adrenal
PAS_11	5	328	0.924534	FALSE	Adrenal
Pep_M12B_propep	5	276	0.727388	FALSE	Adrenal
PFK	5	889	1	FALSE	Adrenal
PID	5	575	1	FALSE	Adrenal
PI-PLC-X	5	458	1	FALSE	Adrenal
PLAT	5	349	0.990957	FALSE	Adrenal
RasGAP	5	368	1	FALSE	Adrenal
Reprolysin	5	413	1	FALSE	Adrenal
Reticulon	5	342	0.969497	FALSE	Adrenal
RRM_6	5	216	0.457998	FALSE	Adrenal
SRCR	5	314	0.876592	FALSE	Adrenal
TAS2R	5	1501	0.998825	FALSE	Adrenal
TIG	5	349	0.990957	FALSE	Adrenal
TTL	5	586	1	FALSE	Adrenal
Tubulin	5	684	1	FALSE	Adrenal
Tweety	5	406	1	FALSE	Adrenal
Zip	5	925	1	FALSE	Adrenal
Zona_pellucida	5	775	1	FALSE	Adrenal
AA_permease_2	4	1673	0.944402	FALSE	Adrenal
ACBP	4	181	0.504946	FALSE	Adrenal
ADAM_spacer1	4	239	0.820115	FALSE	Adrenal
Arm_2	4	738	1	FALSE	Adrenal
Band_3_cyto	4	529	1	FALSE	Adrenal
BAR	4	497	1	FALSE	Adrenal
bZIP_Maf	4	79	0.0151438	TRUE	Adrenal
Cadherin_C	4	563	1	FALSE	Adrenal
COesterase	4	1131	1	FALSE	Adrenal
CRAL_TRIO_2	4	288	1	FALSE	Adrenal
Death	4	245	0.848472	FALSE	Adrenal
DENN	4	620	1	FALSE	Adrenal
DHC_N2	4	844	1	FALSE	Adrenal
DOT1	4	203	0.631339	FALSE	Adrenal
DUF106	4	187	0.54083	FALSE	Adrenal
DUF1619	4	301	1	FALSE	Adrenal
EF-hand_7	4	137	0.252684	FALSE	Adrenal
ERG4_ERG24	4	686	1	FALSE	Adrenal
FAD_binding_3	4	116	0.143179	FALSE	Adrenal
FERM_C	4	272	0.963245	FALSE	Adrenal
FYRN	4	55	0.000165763	TRUE	Adrenal
Fz	4	457	1	FALSE	Adrenal
Gal_Lectin	4	81	0.0190048	TRUE	Adrenal
Gal-bind_lectin	4	395	1	FALSE	Adrenal
Gasdermin	4	899	1	FALSE	Adrenal
Glyco_hydro_1	4	1059	1	FALSE	Adrenal
Glyco_transf_29	4	833	1	FALSE	Adrenal
Glycos_transf_1	4	474	1	FALSE	Adrenal
Glypican	4	1684	0.940807	FALSE	Adrenal
GST_C_2	4	199	0.607998	FALSE	Adrenal
Helicase_C_4	4	279	0.990202	FALSE	Adrenal
Hexokinase_1	4	206	0.648396	FALSE	Adrenal
HMG_box	4	207	0.653999	FALSE	Adrenal
HSP70	4	869	1	FALSE	Adrenal
Kazal_2	4	84	0.0245349	TRUE	Adrenal
Kunitz_BPTI	4	106	0.0971153	TRUE	Adrenal
L27	4	45	2.1281e-06	TRUE	Adrenal
Med23	4	1313	0.994204	FALSE	Adrenal
MHC_II_beta	4	224	0.7443	FALSE	Adrenal
MIR	4	287	1	FALSE	Adrenal
MYT1	4	461	1	FALSE	Adrenal
Na_sulph_symp	4	1214	0.998248	FALSE	Adrenal
NAP	4	769	1	FALSE	Adrenal
Neur_chan_LBD	4	829	1	FALSE	Adrenal
NHS	4	773	1	FALSE	Adrenal
Nitroreductase	4	137	0.252684	FALSE	Adrenal
NMDAR2_C	4	1271	0.995862	FALSE	Adrenal
NTP_transferase	4	233	0.790669	FALSE	Adrenal
PAP2	4	336	1	FALSE	Adrenal
Patatin	4	334	1	FALSE	Adrenal
Peptidase_M10	4	481	1	FALSE	Adrenal
Phosphodiest	4	658	1	FALSE	Adrenal
PNP_UDP_1	4	130	0.215145	FALSE	Adrenal
PP2C	4	695	1	FALSE	Adrenal
PWWP	4	218	0.713063	FALSE	Adrenal
RabGAP-TBC	4	774	1	FALSE	Adrenal
RasGEF	4	591	1	FALSE	Adrenal
Recep_L_domain	4	228	0.765248	FALSE	Adrenal
Reeler	4	126	0.193663	FALSE	Adrenal
RRM_5	4	165	0.411958	FALSE	Adrenal
SAM_2	4	130	0.215145	FALSE	Adrenal
SAM_PNT	4	167	0.42407	FALSE	Adrenal
SCAN	4	189	0.55241	FALSE	Adrenal
Sec23_helical	4	311	1	FALSE	Adrenal
SM-ATX	4	72	0.00659527	TRUE	Adrenal
SPRY	4	504	1	FALSE	Adrenal
Sulfotransfer_1	4	927	1	FALSE	Adrenal
Thioredoxin	4	321	1	FALSE	Adrenal
Thioredoxin_6	4	342	1	FALSE	Adrenal
TNFR_c6	4	119	0.158225	FALSE	Adrenal
Troponin	4	288	1	FALSE	Adrenal
TSP_1	4	211	0.676011	FALSE	Adrenal
TTKRSYEDQ	4	506	1	FALSE	Adrenal
Tuberin	4	355	1	FALSE	Adrenal
wnt	4	966	1	FALSE	Adrenal
WW	4	90	0.0395628	TRUE	Adrenal
zf-C3HC4	4	93	0.0491173	TRUE	Adrenal
zf-DHHC	4	257	0.901811	FALSE	Adrenal
zf-FCS	4	81	0.0190048	TRUE	Adrenal
2OG-FeII_Oxy_2	3	199	0.936585	FALSE	Adrenal
7tm_3	3	481	1	FALSE	Adrenal
A2M_comp	3	343	1	FALSE	Adrenal
AAA_5	3	294	1	FALSE	Adrenal
AAA_8	3	540	1	FALSE	Adrenal
ABC2_membrane_3	3	816	1	FALSE	Adrenal
Abhydrolase_1	3	497	1	FALSE	Adrenal
Acyl-CoA_dh_N	3	112	0.321526	FALSE	Adrenal
Agenet	3	124	0.413992	FALSE	Adrenal
AIF-MLS	3	309	1	FALSE	Adrenal
AIG1	3	617	1	FALSE	Adrenal
AKAP_110	3	1313	0.919752	FALSE	Adrenal
Aldedh	3	858	1	FALSE	Adrenal
Aldolase_II	3	183	0.843818	FALSE	Adrenal
An_peroxidase	3	1104	0.988583	FALSE	Adrenal
Arm	3	124	0.413992	FALSE	Adrenal
ASC	3	872	1	FALSE	Adrenal
Asparaginase_2	3	297	1	FALSE	Adrenal
Auts2	3	201	0.947368	FALSE	Adrenal
Band_7	3	585	1	FALSE	Adrenal
Bap31	3	444	1	FALSE	Adrenal
BCIP	3	203	0.957992	FALSE	Adrenal
BEX	3	211	0.998963	FALSE	Adrenal
BSP_II	3	298	1	FALSE	Adrenal
BTB_2	3	187	0.86829	FALSE	Adrenal
C1-set	3	169	0.751344	FALSE	Adrenal
C2-set_2	3	169	0.751344	FALSE	Adrenal
CAGE1	3	289	1	FALSE	Adrenal
CD20	3	268	1	FALSE	Adrenal
CDC73	3	293	1	FALSE	Adrenal
Cmyb_C	3	171	0.765248	FALSE	Adrenal
CP2	3	230	1	FALSE	Adrenal
Crystall	3	162	0.702661	FALSE	Adrenal
CTD_bind	3	63	0.0245349	TRUE	Adrenal
Cullin	3	1603	0.81775	FALSE	Adrenal
DAZAP2	3	134	0.490619	FALSE	Adrenal
DDHD	3	454	1	FALSE	Adrenal
DMAP_binding	3	230	1	FALSE	Adrenal
DNA_pol_B_palm	3	111	0.313437	FALSE	Adrenal
Dpy19	3	1262	0.941241	FALSE	Adrenal
DUF1041	3	108	0.291759	FALSE	Adrenal
DUF1693	3	640	1	FALSE	Adrenal
DUF3402	3	402	1	FALSE	Adrenal
DUF3451	3	208	0.983876	FALSE	Adrenal
DUF4471	3	294	1	FALSE	Adrenal
DUF4475	3	288	1	FALSE	Adrenal
Dynamin_M	3	590	1	FALSE	Adrenal
E2F_TDP	3	137	0.515091	FALSE	Adrenal
E3_UbLigase_R4	3	797	1	FALSE	Adrenal
Enamelin	3	903	0.998684	FALSE	Adrenal
Epimerase	3	216	1	FALSE	Adrenal
ERCC4	3	327	1	FALSE	Adrenal
ETS_PEA3_N	3	366	1	FALSE	Adrenal
Exostosin	3	395	1	FALSE	Adrenal
F420_oxidored	3	88	0.149938	FALSE	Adrenal
F5_F8_type_C	3	265	1	FALSE	Adrenal
Far-17a_AIG1	3	212	1	FALSE	Adrenal
FAT	3	842	1	FALSE	Adrenal
F-box-like	3	86	0.136303	FALSE	Adrenal
FGF	3	224	1	FALSE	Adrenal
FNIP_N	3	82	0.112356	FALSE	Adrenal
FXa_inhibition	3	72	0.0586652	TRUE	Adrenal
FYRC	3	172	0.772108	FALSE	Adrenal
Galactosyl_T	3	383	1	FALSE	Adrenal
Glyco_hydro_15	3	1744	0.777559	FALSE	Adrenal
Glyco_hydro_47	3	862	1	FALSE	Adrenal
Guanylate_cyc	3	579	1	FALSE	Adrenal
HEAT_2	3	297	1	FALSE	Adrenal
Hira	3	175	0.792335	FALSE	Adrenal
HSNSD	3	979	0.9945	FALSE	Adrenal
Ion_trans_2	3	87	0.143179	FALSE	Adrenal
JCAD	3	1348	0.905716	FALSE	Adrenal
Josephin	3	161	0.695646	FALSE	Adrenal
K167R	3	221	1	FALSE	Adrenal
KRAP_IP3R_bind	3	57	0.0111049	TRUE	Adrenal
L_HGMIC_fpl	3	178	0.812048	FALSE	Adrenal
LBP_BPI_CETP	3	353	1	FALSE	Adrenal
Ldh_1_C	3	507	1	FALSE	Adrenal
Ldl_recept_a	3	117	0.360402	FALSE	Adrenal
Lipase	3	651	1	FALSE	Adrenal
LNS2	3	157	0.666916	FALSE	Adrenal
LRR_4	3	149	0.606021	FALSE	Adrenal
LRR_6	3	24	1.1981e-11	TRUE	Adrenal
LRR_9	3	447	1	FALSE	Adrenal
MAM	3	479	1	FALSE	Adrenal
MARVEL	3	449	1	FALSE	Adrenal
Med12-LCEWAV	3	473	1	FALSE	Adrenal
Methyltransf_11	3	194	0.9089	FALSE	Adrenal
MRG	3	369	1	FALSE	Adrenal
Na_Ca_ex	3	420	1	FALSE	Adrenal
NAD_binding_10	3	90	0.163114	FALSE	Adrenal
NCD3G	3	105	0.26979	FALSE	Adrenal
Nebulin	3	29	2.16617e-08	TRUE	Adrenal
NHL	3	30	5.0784e-08	TRUE	Adrenal
Nuc_sug_transp	3	526	1	FALSE	Adrenal
OATP	3	1205	0.966855	FALSE	Adrenal
OTU	3	149	0.606021	FALSE	Adrenal
Oxysterol_BP	3	729	1	FALSE	Adrenal
PCI_Csn8	3	255	1	FALSE	Adrenal
PEPCK	3	447	1	FALSE	Adrenal
Peptidase_M20	3	690	1	FALSE	Adrenal
Peptidase_S9	3	210	0.99397	FALSE	Adrenal
PI-PLC-Y	3	35	4.90719e-06	TRUE	Adrenal
PLU-1	3	330	1	FALSE	Adrenal
Preseq_ALAS	3	101	0.238986	FALSE	Adrenal
Pribosyltran_N	3	234	1	FALSE	Adrenal
PRY	3	98	0.218629	FALSE	Adrenal
PSI	3	203	0.957992	FALSE	Adrenal
Pyr_redox_2	3	278	1	FALSE	Adrenal
Ric8	3	580	1	FALSE	Adrenal
RNase_PH	3	394	1	FALSE	Adrenal
SDF	3	701	1	FALSE	Adrenal
SLAIN	3	382	1	FALSE	Adrenal
Sp100	3	104	0.262256	FALSE	Adrenal
START	3	596	1	FALSE	Adrenal
Tektin	3	734	1	FALSE	Adrenal
Tetraspannin	3	669	1	FALSE	Adrenal
TGFb_propeptide	3	801	1	FALSE	Adrenal
Tmp39	3	434	1	FALSE	Adrenal
TPT	3	145	0.576879	FALSE	Adrenal
tRNA-synt_1g	3	648	1	FALSE	Adrenal
UPAR_LY6	3	150	0.613899	FALSE	Adrenal
zf-3CxxC	3	310	1	FALSE	Adrenal
zf-C2H2_6	3	26	3.1754e-10	TRUE	Adrenal
zf-C4	3	139	0.531038	FALSE	Adrenal
zf-CCCH	3	54	0.00659527	TRUE	Adrenal
Zfx_Zfy_act	3	647	1	FALSE	Adrenal
2-Hacid_dh	2	309	1	FALSE	Adrenal
5-FTHF_cyc-lig	2	198	1	FALSE	Adrenal
A_deaminase	2	408	1	FALSE	Adrenal
AA_permease	2	411	1	FALSE	Adrenal
AAA_11	2	153	1	FALSE	Adrenal
AAA_2	2	194	1	FALSE	Adrenal
AAA_7	2	272	1	FALSE	Adrenal
ABC_membrane_2	2	288	1	FALSE	Adrenal
Abhydrolase_3	2	180	1	FALSE	Adrenal
Aconitase	2	511	1	FALSE	Adrenal
Acyltransferase	2	310	1	FALSE	Adrenal
ADH_zinc_N	2	271	1	FALSE	Adrenal
ADK	2	179	1	FALSE	Adrenal
Ago_hook	2	147	1	FALSE	Adrenal
Alg6_Alg8	2	341	1	FALSE	Adrenal
Amidase_2	2	299	1	FALSE	Adrenal
Aminotran_3	2	695	0.991361	FALSE	Adrenal
APCDDC	2	189	1	FALSE	Adrenal
APG5	2	158	1	FALSE	Adrenal
Asp	2	662	0.993782	FALSE	Adrenal
Bax1-I	2	357	1	FALSE	Adrenal
Bcl-2	2	197	1	FALSE	Adrenal
Beta_helix	2	176	1	FALSE	Adrenal
BicD	2	719	0.989706	FALSE	Adrenal
Bromodomain	2	144	1	FALSE	Adrenal
C4	2	114	0.765248	FALSE	Adrenal
Cadherin_2	2	84	0.430045	FALSE	Adrenal
Calc_CGRP_IAPP	2	125	0.871266	FALSE	Adrenal
Calcipressin	2	172	1	FALSE	Adrenal
Calx-beta	2	106	0.681417	FALSE	Adrenal
CAMSAP_CH	2	86	0.453421	FALSE	Adrenal
CAP_GLY	2	66	0.225518	FALSE	Adrenal
Carb_kinase	2	216	1	FALSE	Adrenal
CarboxypepD_reg	2	151	1	FALSE	Adrenal
Cation_efflux	2	595	0.999304	FALSE	Adrenal
CD99L2	2	158	1	FALSE	Adrenal
CENP-T	2	490	1	FALSE	Adrenal
CEP170_C	2	409	1	FALSE	Adrenal
CG-1	2	117	0.795656	FALSE	Adrenal
CHGN	2	983	0.859224	FALSE	Adrenal
Chromo	2	118	0.805533	FALSE	Adrenal
Clat_adaptor_s	2	140	0.99397	FALSE	Adrenal
CLCA_N	2	262	1	FALSE	Adrenal
Cnd2	2	708	0.990454	FALSE	Adrenal
CoA_trans	2	200	1	FALSE	Adrenal
COG6	2	557	1	FALSE	Adrenal
Connexin	2	217	1	FALSE	Adrenal
CortBP2	2	193	1	FALSE	Adrenal
CPSase_sm_chain	2	72	0.291759	FALSE	Adrenal
CRAL_TRIO	2	155	1	FALSE	Adrenal
Cu2_monooxygen	2	135	0.95535	FALSE	Adrenal
Cyclin_C	2	223	1	FALSE	Adrenal
Cyt-b5	2	75	0.32553	FALSE	Adrenal
DAGAT	2	596	0.999215	FALSE	Adrenal
Dapper	2	172	1	FALSE	Adrenal
DDE_1	2	416	1	FALSE	Adrenal
DDE_Tnp_1_7	2	725	0.989305	FALSE	Adrenal
Dendrin	2	655	0.994319	FALSE	Adrenal
DIL	2	110	0.723323	FALSE	Adrenal
DLIC	2	939	0.882699	FALSE	Adrenal
DNA_pol_B	2	541	1	FALSE	Adrenal
DREV	2	228	1	FALSE	Adrenal
Drf_FH3	2	202	1	FALSE	Adrenal
DUF108	2	100	0.613899	FALSE	Adrenal
DUF1227	2	146	1	FALSE	Adrenal
DUF1744	2	401	1	FALSE	Adrenal
DUF1981	2	86	0.453421	FALSE	Adrenal
DUF2201	2	118	0.805533	FALSE	Adrenal
DUF2439	2	76	0.337384	FALSE	Adrenal
DUF3338	2	138	0.978774	FALSE	Adrenal
DUF3401	2	249	1	FALSE	Adrenal
DUF3496	2	109	0.713063	FALSE	Adrenal
DUF3513	2	194	1	FALSE	Adrenal
DUF3657	2	58	0.143179	FALSE	Adrenal
DUF4207	2	265	1	FALSE	Adrenal
DUF4564	2	63	0.193663	FALSE	Adrenal
DUF4590	2	116	0.785651	FALSE	Adrenal
DUF706	2	255	1	FALSE	Adrenal
DUF726	2	337	1	FALSE	Adrenal
DUF829	2	156	1	FALSE	Adrenal
Dynamin_N	2	338	1	FALSE	Adrenal
EamA	2	67	0.235657	FALSE	Adrenal
EF-hand_6	2	62	0.182533	FALSE	Adrenal
EF-hand_like	2	92	0.523108	FALSE	Adrenal
EMP70	2	547	1	FALSE	Adrenal
Ephrin_lbd	2	175	1	FALSE	Adrenal
EPL1	2	153	1	FALSE	Adrenal
ESSS	2	50	0.0734719	TRUE	Adrenal
FAD_binding_8	2	133	0.939296	FALSE	Adrenal
FAM124	2	235	1	FALSE	Adrenal
FAM47	2	259	1	FALSE	Adrenal
FancD2	2	1424	0.687551	FALSE	Adrenal
FANCI_S4	2	256	1	FALSE	Adrenal
FERM_N	2	164	1	FALSE	Adrenal
Ferric_reduct	2	149	1	FALSE	Adrenal
FGGY_N	2	263	1	FALSE	Adrenal
Flavodoxin_1	2	278	1	FALSE	Adrenal
Fmp27	2	450	1	FALSE	Adrenal
FTCD_C	2	185	1	FALSE	Adrenal
Fucokinase	2	404	1	FALSE	Adrenal
Fzo_mitofusin	2	171	1	FALSE	Adrenal
G8	2	134	0.947368	FALSE	Adrenal
GATA	2	72	0.291759	FALSE	Adrenal
GATase	2	177	1	FALSE	Adrenal
GCR	2	376	1	FALSE	Adrenal
GDE_C	2	484	1	FALSE	Adrenal
Gelsolin	2	76	0.337384	FALSE	Adrenal
GF_recep_IV	2	133	0.939296	FALSE	Adrenal
GH3	2	282	1	FALSE	Adrenal
GIT_SHD	2	31	0.00111108	TRUE	Adrenal
Glyco_hydro_18	2	681	0.992367	FALSE	Adrenal
Glyco_transf_10	2	709	0.990386	FALSE	Adrenal
Glyco_transf_41	2	469	1	FALSE	Adrenal
GOLGA2L5	2	622	0.996972	FALSE	Adrenal
Golgin_A5	2	468	1	FALSE	Adrenal
Got1	2	191	1	FALSE	Adrenal
GPS	2	46	0.0458311	TRUE	Adrenal
GRIN_C	2	262	1	FALSE	Adrenal
HATPase_c_3	2	139	0.986413	FALSE	Adrenal
HDNR	2	151	1	FALSE	Adrenal
Hemopexin	2	91	0.51105	FALSE	Adrenal
Hexokinase_2	2	480	1	FALSE	Adrenal
Histone	2	148	1	FALSE	Adrenal
HOOK	2	714	0.990044	FALSE	Adrenal
Hormone_1	2	192	1	FALSE	Adrenal
HS1_rep	2	25	2.67228e-05	TRUE	Adrenal
HSA	2	73	0.302403	FALSE	Adrenal
IBR	2	65	0.215145	FALSE	Adrenal
IER	2	404	1	FALSE	Adrenal
ig	2	52	0.0887934	TRUE	Adrenal
IL10	2	159	1	FALSE	Adrenal
Integrin_alpha2	2	857	0.93118	FALSE	Adrenal
Integrin_beta	2	93	0.534971	FALSE	Adrenal
Interfer-bind	2	181	1	FALSE	Adrenal
Interferon	2	324	1	FALSE	Adrenal
IQ	2	21	2.38129e-07	TRUE	Adrenal
KAP_NTPase	2	379	1	FALSE	Adrenal
Kelch_6	2	49	0.065461	TRUE	Adrenal
Keratin_B2	2	127	0.888875	FALSE	Adrenal
La	2	116	0.785651	FALSE	Adrenal
Laminin_II	2	129	0.906072	FALSE	Adrenal
Latrophilin	2	267	1	FALSE	Adrenal
Ldl_recept_b	2	77	0.349005	FALSE	Adrenal
Linker_histone	2	148	1	FALSE	Adrenal
Lipin_N	2	114	0.765248	FALSE	Adrenal
Lipocalin_7	2	128	0.897524	FALSE	Adrenal
LUC7	2	300	1	FALSE	Adrenal
M16C_assoc	2	249	1	FALSE	Adrenal
MA3	2	114	0.765248	FALSE	Adrenal
MAGE	2	342	1	FALSE	Adrenal
MAPEG	2	124	0.862262	FALSE	Adrenal
Matrilin_ccoil	2	45	0.0395628	TRUE	Adrenal
Med24_N	2	987	0.857168	FALSE	Adrenal
Med25_SD1	2	158	1	FALSE	Adrenal
Membr_traf_MHD	2	143	1	FALSE	Adrenal
Methyltransf_32	2	125	0.871266	FALSE	Adrenal
Mg_trans_NIPA	2	300	1	FALSE	Adrenal
MHC_I	2	273	1	FALSE	Adrenal
Miro	2	120	0.824915	FALSE	Adrenal
Mlf1IP	2	129	0.906072	FALSE	Adrenal
MOR2-PAG1_N	2	1068	0.818054	FALSE	Adrenal
MTHFR	2	290	1	FALSE	Adrenal
MutS_II	2	158	1	FALSE	Adrenal
MutS_III	2	306	1	FALSE	Adrenal
MutS_V	2	237	1	FALSE	Adrenal
Myb_DNA-binding	2	56	0.124055	FALSE	Adrenal
Myosin_TH1	2	197	1	FALSE	Adrenal
Na_K-ATPase	2	294	1	FALSE	Adrenal
Na_trans_assoc	2	203	1	FALSE	Adrenal
NDUF_B8	2	181	1	FALSE	Adrenal
Neuregulin	2	437	1	FALSE	Adrenal
Neurochondrin	2	608	0.998162	FALSE	Adrenal
Nic96	2	603	0.998597	FALSE	Adrenal
NMT	2	160	1	FALSE	Adrenal
NPL4	2	310	1	FALSE	Adrenal
NPR3	2	293	1	FALSE	Adrenal
NuA4	2	82	0.405818	FALSE	Adrenal
NUDIX	2	135	0.95535	FALSE	Adrenal
OAS1_C	2	375	1	FALSE	Adrenal
OLF	2	508	1	FALSE	Adrenal
OPA3	2	133	0.939296	FALSE	Adrenal
OSCP	2	115	0.775516	FALSE	Adrenal
Oxidored_q6	2	105	0.670567	FALSE	Adrenal
P_proprotein	2	179	1	FALSE	Adrenal
P2X_receptor	2	406	1	FALSE	Adrenal
P5CR_dimer	2	107	0.692114	FALSE	Adrenal
PA	2	167	1	FALSE	Adrenal
PAD_N	2	114	0.765248	FALSE	Adrenal
PALP	2	638	0.99566	FALSE	Adrenal
PARP	2	353	1	FALSE	Adrenal
Patched	2	205	1	FALSE	Adrenal
PB1	2	167	1	FALSE	Adrenal
PBC	2	198	1	FALSE	Adrenal
PBD	2	59	0.153274	FALSE	Adrenal
Pecanex_C	2	462	1	FALSE	Adrenal
Pentaxin	2	194	1	FALSE	Adrenal
Peptidase_C1	2	429	1	FALSE	Adrenal
Peptidase_C69	2	217	1	FALSE	Adrenal
Peptidase_M1	2	782	0.982046	FALSE	Adrenal
Peptidase_M16	2	96	0.569439	FALSE	Adrenal
Peptidase_M24	2	155	1	FALSE	Adrenal
Peptidase_M28	2	241	1	FALSE	Adrenal
PEX11	2	227	1	FALSE	Adrenal
PfkB	2	300	1	FALSE	Adrenal
Phospholip_A2_2	2	92	0.523108	FALSE	Adrenal
PIP49_C	2	199	1	FALSE	Adrenal
PIP49_N	2	288	1	FALSE	Adrenal
Piwi	2	312	1	FALSE	Adrenal
PLC-beta_C	2	85	0.441836	FALSE	Adrenal
PLDc_2	2	159	1	FALSE	Adrenal
PMG	2	325	1	FALSE	Adrenal
PNMA	2	328	1	FALSE	Adrenal
PP1_inhibitor	2	124	0.862262	FALSE	Adrenal
PPAK	2	28	0.000236202	TRUE	Adrenal
PRELI	2	157	1	FALSE	Adrenal
Pre-SET	2	99	0.602326	FALSE	Adrenal
Pro_isomerase	2	311	1	FALSE	Adrenal
Proteasome	2	193	1	FALSE	Adrenal
PTE	2	333	1	FALSE	Adrenal
PTS_2-RNA	2	147	1	FALSE	Adrenal
PUA_2	2	162	1	FALSE	Adrenal
PX	2	162	1	FALSE	Adrenal
Pyridoxal_deC	2	369	1	FALSE	Adrenal
Rad17	2	511	1	FALSE	Adrenal
Radial_spoke	2	164	1	FALSE	Adrenal
RAI16-like	2	418	1	FALSE	Adrenal
RasGEF_N	2	101	0.625569	FALSE	Adrenal
RasGEF_N_2	2	115	0.775516	FALSE	Adrenal
RBP_receptor	2	619	0.997223	FALSE	Adrenal
RCC1	2	50	0.0734719	TRUE	Adrenal
Rep_fac_C	2	218	1	FALSE	Adrenal
Retinal	2	1264	0.739353	FALSE	Adrenal
RHD	2	160	1	FALSE	Adrenal
Ribosomal_L4	2	193	1	FALSE	Adrenal
Ribosomal_L6e	2	108	0.702661	FALSE	Adrenal
Ricin_B_lectin	2	247	1	FALSE	Adrenal
RNA_pol	2	401	1	FALSE	Adrenal
RYDR_ITPR	2	212	1	FALSE	Adrenal
SAM_1	2	65	0.215145	FALSE	Adrenal
SAPS	2	249	1	FALSE	Adrenal
SCO1-SenC	2	182	1	FALSE	Adrenal
SEA	2	222	1	FALSE	Adrenal
Sec1	2	1124	0.793482	FALSE	Adrenal
Sec7	2	377	1	FALSE	Adrenal
Sec8_exocyst	2	121	0.834425	FALSE	Adrenal
SGT1	2	585	1	FALSE	Adrenal
SK_channel	2	119	0.815285	FALSE	Adrenal
SLA_LP_auto_ag	2	399	1	FALSE	Adrenal
SMC_N	2	1196	0.764456	FALSE	Adrenal
SMK-1	2	194	1	FALSE	Adrenal
SNAP	2	536	1	FALSE	Adrenal
SNARE_assoc	2	124	0.862262	FALSE	Adrenal
SPO22	2	259	1	FALSE	Adrenal
SR-25	2	212	1	FALSE	Adrenal
SRA1	2	51	0.0812455	TRUE	Adrenal
SRCR_2	2	96	0.569439	FALSE	Adrenal
SSF	2	405	1	FALSE	Adrenal
ST7	2	433	1	FALSE	Adrenal
STAS	2	145	1	FALSE	Adrenal
STAT_int	2	121	0.834425	FALSE	Adrenal
Strabismus	2	1000	0.850571	FALSE	Adrenal
Succ_DH_flav_C	2	153	1	FALSE	Adrenal
Suppressor_APC	2	155	1	FALSE	Adrenal
Syntaxin_2	2	104	0.659562	FALSE	Adrenal
T4_deiodinase	2	259	1	FALSE	Adrenal
T-box	2	365	1	FALSE	Adrenal
TBPIP	2	171	1	FALSE	Adrenal
Tcf25	2	342	1	FALSE	Adrenal
Telomerase_RBD	2	137	0.971052	FALSE	Adrenal
TEX33	2	121	0.834425	FALSE	Adrenal
TH1	2	580	1	FALSE	Adrenal
THF_DHG_CYH	2	118	0.805533	FALSE	Adrenal
THF_DHG_CYH_C	2	126	0.880123	FALSE	Adrenal
TLD	2	213	1	FALSE	Adrenal
TM231	2	307	1	FALSE	Adrenal
Toprim	2	152	1	FALSE	Adrenal
TPP_enzyme_M	2	130	0.914522	FALSE	Adrenal
TPR_1	2	68	0.246856	FALSE	Adrenal
Transferrin	2	341	1	FALSE	Adrenal
Transketolase_N	2	165	1	FALSE	Adrenal
TRC8_N	2	500	1	FALSE	Adrenal
Treacle	2	151	1	FALSE	Adrenal
Treslin_N	2	798	0.970595	FALSE	Adrenal
TRF	2	198	1	FALSE	Adrenal
tRNA-synt_1	2	792	0.974849	FALSE	Adrenal
tRNA-synt_1b	2	293	1	FALSE	Adrenal
Tubulin_C	2	254	1	FALSE	Adrenal
Tudor-knot	2	64	0.20453	FALSE	Adrenal
ubiquitin	2	142	1	FALSE	Adrenal
UMPH-1	2	246	1	FALSE	Adrenal
UQ_con	2	159	1	FALSE	Adrenal
Urm1	2	96	0.569439	FALSE	Adrenal
V_ATPase_I	2	797	0.971301	FALSE	Adrenal
V-ATPase_C	2	640	0.995499	FALSE	Adrenal
V-ATPase_H_N	2	308	1	FALSE	Adrenal
VGCC_alpha2	2	94	0.546643	FALSE	Adrenal
VIT	2	236	1	FALSE	Adrenal
VWA_2	2	338	1	FALSE	Adrenal
VWD	2	303	1	FALSE	Adrenal
WGR	2	85	0.441836	FALSE	Adrenal
WH1	2	107	0.692114	FALSE	Adrenal
XendoU	2	272	1	FALSE	Adrenal
XPC-binding	2	118	0.805533	FALSE	Adrenal
Xpo1	2	294	1	FALSE	Adrenal
Yip1	2	324	1	FALSE	Adrenal
zf-B_box	2	89	0.486994	FALSE	Adrenal
zf-C2H2	2	23	3.37774e-06	TRUE	Adrenal
zf-C2H2_2	2	55	0.115321	FALSE	Adrenal
zf-C2H2_4	2	26	5.70886e-05	TRUE	Adrenal
zf-C3HC	2	130	0.914522	FALSE	Adrenal
zf-C3HC4_4	2	83	0.418041	FALSE	Adrenal
zf-C5HC2	2	109	0.713063	FALSE	Adrenal
zf-MYND	2	83	0.418041	FALSE	Adrenal
zf-NF-X1	2	20	5.0784e-08	TRUE	Adrenal
Jun	1	237	1	FALSE	Adrenal
3Beta_HSD	1	282	1	FALSE	Adrenal
53-BP1_Tudor	1	122	1	FALSE	Adrenal
5-nucleotidase	1	274	1	FALSE	Adrenal
60KD_IMP	1	200	1	FALSE	Adrenal
A2M	1	91	1	FALSE	Adrenal
A2M_N	1	118	1	FALSE	Adrenal
AAA_25	1	108	1	FALSE	Adrenal
Abhydro_lipase	1	63	0.880123	FALSE	Adrenal
Acatn	1	139	1	FALSE	Adrenal
Acetyltransf_1	1	81	1	FALSE	Adrenal
Acyl-CoA_dh_1	1	150	1	FALSE	Adrenal
Adaptin_N	1	517	0.833911	FALSE	Adrenal
Adenylsucc_synt	1	423	0.938215	FALSE	Adrenal
ADH_N	1	79	1	FALSE	Adrenal
adh_short_C2	1	229	1	FALSE	Adrenal
AdoHcyase	1	427	0.933085	FALSE	Adrenal
Aha1_N	1	80	1	FALSE	Adrenal
AIG2_2	1	75	1	FALSE	Adrenal
AIRS_C	1	172	1	FALSE	Adrenal
AlaDh_PNT_C	1	165	1	FALSE	Adrenal
AlaDh_PNT_N	1	140	1	FALSE	Adrenal
Alk_phosphatase	1	440	0.9169	FALSE	Adrenal
Alpha_kinase	1	189	1	FALSE	Adrenal
Alpha_L_fucos	1	357	0.990044	FALSE	Adrenal
Alpha-mann_mid	1	80	1	FALSE	Adrenal
Amelin	1	257	1	FALSE	Adrenal
Amidinotransf	1	169	1	FALSE	Adrenal
Amidohydro_1	1	350	0.991009	FALSE	Adrenal
Aminotran_4	1	251	1	FALSE	Adrenal
Aminotran_5	1	432	0.926774	FALSE	Adrenal
Ammonium_transp	1	287	1	FALSE	Adrenal
Androgen_recep	1	444	0.912064	FALSE	Adrenal
Anticodon_1	1	169	1	FALSE	Adrenal
ApoL	1	303	0.998335	FALSE	Adrenal
Apolipoprotein	1	200	1	FALSE	Adrenal
ApoO	1	155	1	FALSE	Adrenal
APP_E2	1	186	1	FALSE	Adrenal
ArfGap	1	119	1	FALSE	Adrenal
Arrestin_C	1	138	1	FALSE	Adrenal
Arrestin_N	1	157	1	FALSE	Adrenal
ArsA_ATPase	1	304	0.998162	FALSE	Adrenal
ASD2	1	292	1	FALSE	Adrenal
Atg8	1	104	1	FALSE	Adrenal
ATP11	1	242	1	FALSE	Adrenal
ATP-gua_Ptrans	1	248	1	FALSE	Adrenal
ATP-synt_ab_C	1	99	1	FALSE	Adrenal
ATP-synt_S1	1	406	0.960855	FALSE	Adrenal
Atrophin-1	1	999	0.562465	FALSE	Adrenal
Auto_anti-p27	1	42	0.430045	FALSE	Adrenal
B2-adapt-app_C	1	113	1	FALSE	Adrenal
Bac_surface_Ag	1	318	0.995821	FALSE	Adrenal
BaffR-Tall_bind	1	31	0.182533	FALSE	Adrenal
BASP1	1	226	1	FALSE	Adrenal
BBS2_C	1	279	1	FALSE	Adrenal
BCL_N	1	52	0.659562	FALSE	Adrenal
Bcl-2_BAD	1	168	1	FALSE	Adrenal
BCNT	1	79	1	FALSE	Adrenal
BEN	1	80	1	FALSE	Adrenal
Biopterin_H	1	332	0.99363	FALSE	Adrenal
Biotin_carb_C	1	108	1	FALSE	Adrenal
BNR_2	1	180	1	FALSE	Adrenal
Branch	1	256	1	FALSE	Adrenal
BRCT	1	72	1	FALSE	Adrenal
BRO1	1	343	0.992004	FALSE	Adrenal
BROMI	1	1287	0.485004	FALSE	Adrenal
BSD	1	62	0.862262	FALSE	Adrenal
C1_1	1	34	0.246856	FALSE	Adrenal
CABIT	1	294	0.999935	FALSE	Adrenal
CAF1-p150_C2	1	292	1	FALSE	Adrenal
CAF1-p150_N	1	229	1	FALSE	Adrenal
Calpain_III	1	144	1	FALSE	Adrenal
Calsarcin	1	264	1	FALSE	Adrenal
Calsequestrin	1	381	0.986939	FALSE	Adrenal
CAP	1	141	1	FALSE	Adrenal
CARD	1	86	1	FALSE	Adrenal
Cas1_AcylT	1	492	0.858708	FALSE	Adrenal
CATSPERD	1	729	0.677656	FALSE	Adrenal
Caveolin	1	149	1	FALSE	Adrenal
CBS	1	63	0.880123	FALSE	Adrenal
CCDC144C	1	294	0.999935	FALSE	Adrenal
CDRT4	1	138	1	FALSE	Adrenal
CDT1	1	165	1	FALSE	Adrenal
cEGF	1	23	0.0458311	TRUE	Adrenal
CENP-F_N	1	307	0.997647	FALSE	Adrenal
CENP-M	1	174	1	FALSE	Adrenal
CEP44	1	132	1	FALSE	Adrenal
Cep57_CLD	1	162	1	FALSE	Adrenal
CEP76-C2	1	163	1	FALSE	Adrenal
Ceramidase	1	205	1	FALSE	Adrenal
CHCH	1	36	0.291759	FALSE	Adrenal
CHD5	1	137	1	FALSE	Adrenal
Choline_kinase	1	212	1	FALSE	Adrenal
CIMR	1	148	1	FALSE	Adrenal
CK2S	1	167	1	FALSE	Adrenal
Cluap1	1	272	1	FALSE	Adrenal
CNH	1	337	0.992881	FALSE	Adrenal
CoA_transf_3	1	192	1	FALSE	Adrenal
COBRA1	1	475	0.876677	FALSE	Adrenal
Cohesin_load	1	548	0.805535	FALSE	Adrenal
Colipase	1	40	0.382551	FALSE	Adrenal
Connexin_CCC	1	67	0.947368	FALSE	Adrenal
COPIIcoated_ERV	1	175	1	FALSE	Adrenal
Coprogen_oxidas	1	304	0.998162	FALSE	Adrenal
COQ7	1	171	1	FALSE	Adrenal
COQ9	1	60	0.824915	FALSE	Adrenal
Cornifin	1	42	0.430045	FALSE	Adrenal
Cortexin	1	81	1	FALSE	Adrenal
COX7a	1	57	0.765248	FALSE	Adrenal
CPSase_L_D2	1	205	1	FALSE	Adrenal
CPSase_L_D3	1	124	1	FALSE	Adrenal
Creatinase_N	1	126	1	FALSE	Adrenal
Creb_binding	1	100	1	FALSE	Adrenal
CRF-BP	1	310	0.997139	FALSE	Adrenal
Cse1	1	371	0.988196	FALSE	Adrenal
CTC1	1	1142	0.519709	FALSE	Adrenal
CTNNBL	1	111	1	FALSE	Adrenal
CTP_transf_2	1	265	1	FALSE	Adrenal
Cu-oxidase_3	1	113	1	FALSE	Adrenal
Cyclin_N	1	123	1	FALSE	Adrenal
Cys_knot	1	97	1	FALSE	Adrenal
Cyto_heme_lyase	1	260	1	FALSE	Adrenal
DAD	1	113	1	FALSE	Adrenal
DAG1	1	290	1	FALSE	Adrenal
DAN	1	118	1	FALSE	Adrenal
DAP3	1	296	0.999573	FALSE	Adrenal
DBC1	1	124	1	FALSE	Adrenal
DDOST_48kD	1	410	0.955401	FALSE	Adrenal
DHFR_1	1	182	1	FALSE	Adrenal
DHO_dh	1	307	0.997647	FALSE	Adrenal
Diphthamide_syn	1	306	0.997818	FALSE	Adrenal
DJ-1_PfpI	1	122	1	FALSE	Adrenal
DM	1	47	0.546643	FALSE	Adrenal
DNA_gyraseB	1	164	1	FALSE	Adrenal
DNA_primase_S	1	191	1	FALSE	Adrenal
dNK	1	158	1	FALSE	Adrenal
DOR	1	191	1	FALSE	Adrenal
Dor1	1	158	1	FALSE	Adrenal
DPPIV_N	1	425	0.935641	FALSE	Adrenal
Draxin	1	316	0.996146	FALSE	Adrenal
DUF1088	1	169	1	FALSE	Adrenal
DUF1162	1	285	1	FALSE	Adrenal
DUF1180	1	132	1	FALSE	Adrenal
DUF1370	1	89	1	FALSE	Adrenal
DUF1387	1	305	0.997989	FALSE	Adrenal
DUF1445	1	126	1	FALSE	Adrenal
DUF1741	1	237	1	FALSE	Adrenal
DUF1875	1	84	1	FALSE	Adrenal
DUF2003	1	445	0.910865	FALSE	Adrenal
DUF2181	1	237	1	FALSE	Adrenal
DUF221	1	344	0.99186	FALSE	Adrenal
DUF2215	1	223	1	FALSE	Adrenal
DUF2305	1	173	1	FALSE	Adrenal
DUF2451	1	236	1	FALSE	Adrenal
DUF2465	1	98	1	FALSE	Adrenal
DUF3361	1	168	1	FALSE	Adrenal
DUF3414	1	1718	0.485004	FALSE	Adrenal
DUF3446	1	85	1	FALSE	Adrenal
DUF3449	1	180	1	FALSE	Adrenal
DUF3497	1	247	1	FALSE	Adrenal
DUF3504	1	160	1	FALSE	Adrenal
DUF3512	1	249	1	FALSE	Adrenal
DUF3548	1	216	1	FALSE	Adrenal
DUF3595	1	49	0.591532	FALSE	Adrenal
DUF3652	1	43	0.453421	FALSE	Adrenal
DUF3730	1	227	1	FALSE	Adrenal
DUF4061	1	88	1	FALSE	Adrenal
DUF4071	1	381	0.986939	FALSE	Adrenal
DUF4200	1	131	1	FALSE	Adrenal
DUF4206	1	77	1	FALSE	Adrenal
DUF4210	1	59	0.805533	FALSE	Adrenal
DUF4371	1	136	1	FALSE	Adrenal
DUF4430	1	75	1	FALSE	Adrenal
DUF4487	1	553	0.801178	FALSE	Adrenal
DUF4517	1	75	1	FALSE	Adrenal
DUF4569	1	298	0.999215	FALSE	Adrenal
DUF4576	1	87	1	FALSE	Adrenal
DUF4582	1	172	1	FALSE	Adrenal
DUF4592	1	112	1	FALSE	Adrenal
DUF4647	1	454	0.900254	FALSE	Adrenal
DUF737	1	162	1	FALSE	Adrenal
DUF775	1	188	1	FALSE	Adrenal
DUF914	1	146	1	FALSE	Adrenal
DUF947	1	166	1	FALSE	Adrenal
Dus	1	306	0.997818	FALSE	Adrenal
Dynactin_p22	1	57	0.765248	FALSE	Adrenal
DZF	1	248	1	FALSE	Adrenal
EF_assoc_1	1	73	1	FALSE	Adrenal
EFG_II	1	73	1	FALSE	Adrenal
EF-hand_8	1	60	0.824915	FALSE	Adrenal
EGF_3	1	38	0.337384	FALSE	Adrenal
eIF-3_zeta	1	521	0.83011	FALSE	Adrenal
EIF4E-T	1	441	0.915685	FALSE	Adrenal
Elf-1_N	1	104	1	FALSE	Adrenal
ELL	1	289	1	FALSE	Adrenal
ELO	1	240	1	FALSE	Adrenal
EMI	1	74	1	FALSE	Adrenal
Enolase_C	1	142	1	FALSE	Adrenal
Enolase_N	1	102	1	FALSE	Adrenal
Ephrin	1	140	1	FALSE	Adrenal
EPTP	1	44	0.475994	FALSE	Adrenal
ERAP1_C	1	320	0.995499	FALSE	Adrenal
ERO1	1	400	0.969188	FALSE	Adrenal
ERp29_N	1	123	1	FALSE	Adrenal
EURL	1	291	1	FALSE	Adrenal
EVE	1	165	1	FALSE	Adrenal
FA	1	48	0.569439	FALSE	Adrenal
FA_hydroxylase	1	112	1	FALSE	Adrenal
F-actin_cap_A	1	271	1	FALSE	Adrenal
FAD_binding_4	1	138	1	FALSE	Adrenal
FAM196	1	535	0.817144	FALSE	Adrenal
FAM220	1	252	1	FALSE	Adrenal
FAM53	1	144	1	FALSE	Adrenal
FAM70	1	348	0.991291	FALSE	Adrenal
FAM86	1	89	1	FALSE	Adrenal
Fasciclin	1	116	1	FALSE	Adrenal
FAST_1	1	73	1	FALSE	Adrenal
FBA	1	187	1	FALSE	Adrenal
Fe_hyd_lg_C	1	297	0.999393	FALSE	Adrenal
FerI	1	71	1	FALSE	Adrenal
FEZ	1	243	1	FALSE	Adrenal
FF	1	50	0.613899	FALSE	Adrenal
FGF-BP1	1	223	1	FALSE	Adrenal
Fibrillarin	1	227	1	FALSE	Adrenal
Filament_head	1	96	1	FALSE	Adrenal
Flavodoxin_2	1	136	1	FALSE	Adrenal
FMO-like	1	531	0.820797	FALSE	Adrenal
fn2	1	40	0.382551	FALSE	Adrenal
FNIP_C	1	188	1	FALSE	Adrenal
FNIP_M	1	240	1	FALSE	Adrenal
Folate_carrier	1	169	1	FALSE	Adrenal
Fork_head_N	1	143	1	FALSE	Adrenal
Frag1	1	211	1	FALSE	Adrenal
FragX_IP	1	865	0.611809	FALSE	Adrenal
FRG2	1	182	1	FALSE	Adrenal
FSA_C	1	605	0.759116	FALSE	Adrenal
FTHFS	1	620	0.747977	FALSE	Adrenal
FtsJ	1	179	1	FALSE	Adrenal
G_glu_transpept	1	452	0.902584	FALSE	Adrenal
G2F	1	190	1	FALSE	Adrenal
GalP_UDP_tr_C	1	169	1	FALSE	Adrenal
Gar1	1	158	1	FALSE	Adrenal
GBP_C	1	297	0.999393	FALSE	Adrenal
GEMIN8	1	230	1	FALSE	Adrenal
G-gamma	1	67	0.947368	FALSE	Adrenal
GIDA_assoc_3	1	74	1	FALSE	Adrenal
Gly_rich	1	172	1	FALSE	Adrenal
Glyco_hydro_38	1	331	0.993782	FALSE	Adrenal
Glyco_hydro_56	1	335	0.993179	FALSE	Adrenal
Glyco_hydro_63	1	790	0.644823	FALSE	Adrenal
Glyco_hydro_79n	1	219	1	FALSE	Adrenal
Glyco_transf_11	1	317	0.995983	FALSE	Adrenal
Glyco_transf_21	1	173	1	FALSE	Adrenal
Glyco_transf_6	1	262	1	FALSE	Adrenal
Glyco_transf_90	1	343	0.992004	FALSE	Adrenal
Glycogen_syn	1	633	0.738646	FALSE	Adrenal
Glycolytic	1	167	1	FALSE	Adrenal
Glyoxalase	1	156	1	FALSE	Adrenal
GMC_oxred_N	1	299	0.999037	FALSE	Adrenal
G-patch	1	47	0.546643	FALSE	Adrenal
Granin	1	588	0.772251	FALSE	Adrenal
GrpE	1	178	1	FALSE	Adrenal
GSHPx	1	115	1	FALSE	Adrenal
GST_C	1	94	1	FALSE	Adrenal
GTPase_binding	1	42	0.430045	FALSE	Adrenal
Gtr1_RagA	1	227	1	FALSE	Adrenal
Guanylate_kin	1	185	1	FALSE	Adrenal
GVQW	1	22	0.034645	TRUE	Adrenal
HAD_2	1	202	1	FALSE	Adrenal
HAUS5	1	616	0.750907	FALSE	Adrenal
HAUS6_N	1	229	1	FALSE	Adrenal
HCaRG	1	78	1	FALSE	Adrenal
HECT_2	1	373	0.98794	FALSE	Adrenal
HgmA	1	430	0.929285	FALSE	Adrenal
HGTP_anticodon	1	100	1	FALSE	Adrenal
HGTP_anticodon2	1	256	1	FALSE	Adrenal
HhH-GPD	1	137	1	FALSE	Adrenal
HIRAN	1	96	1	FALSE	Adrenal
HlyIII	1	224	1	FALSE	Adrenal
HMG-CoA_red	1	383	0.986693	FALSE	Adrenal
Hormone_5	1	78	1	FALSE	Adrenal
HRM	1	71	1	FALSE	Adrenal
HSP90	1	418	0.94473	FALSE	Adrenal
Hydrolase_6	1	103	1	FALSE	Adrenal
IBB	1	104	1	FALSE	Adrenal
ICAP-1_inte_bdg	1	200	1	FALSE	Adrenal
IFRD	1	306	0.997818	FALSE	Adrenal
IGFBP	1	55	0.723323	FALSE	Adrenal
IIGP	1	383	0.986693	FALSE	Adrenal
IL17	1	89	1	FALSE	Adrenal
IL2	1	144	1	FALSE	Adrenal
IL22	1	139	1	FALSE	Adrenal
Insulin	1	163	1	FALSE	Adrenal
IRS	1	94	1	FALSE	Adrenal
ISK_Channel	1	129	1	FALSE	Adrenal
IZUMO	1	160	1	FALSE	Adrenal
Jiraiya	1	180	1	FALSE	Adrenal
Kazal_1	1	55	0.723323	FALSE	Adrenal
Kelch_3	1	48	0.569439	FALSE	Adrenal
Keratin_B2_2	1	46	0.523108	FALSE	Adrenal
ketoacyl-synt	1	180	1	FALSE	Adrenal
Kringle	1	79	1	FALSE	Adrenal
KRTAP	1	57	0.765248	FALSE	Adrenal
Kv2channel	1	290	1	FALSE	Adrenal
L6_membrane	1	192	1	FALSE	Adrenal
Laminin_G_1	1	60	0.824915	FALSE	Adrenal
Laminin_G_3	1	173	1	FALSE	Adrenal
Leo1	1	165	1	FALSE	Adrenal
Leptin	1	146	1	FALSE	Adrenal
LETM1	1	269	1	FALSE	Adrenal
Ligase_CoA	1	124	1	FALSE	Adrenal
Lipase_GDSL	1	99	1	FALSE	Adrenal
Lipoxygenase	1	517	0.833911	FALSE	Adrenal
LMF1	1	471	0.881046	FALSE	Adrenal
LNP1	1	169	1	FALSE	Adrenal
LSM	1	67	0.947368	FALSE	Adrenal
LSM14	1	98	1	FALSE	Adrenal
Ly49	1	127	1	FALSE	Adrenal
Lyase_aromatic	1	479	0.872364	FALSE	Adrenal
Lysyl_oxidase	1	205	1	FALSE	Adrenal
MACPF	1	221	1	FALSE	Adrenal
MAGUK_N_PEST	1	84	1	FALSE	Adrenal
Mak16	1	100	1	FALSE	Adrenal
MANEC	1	77	1	FALSE	Adrenal
MaoC_dehydratas	1	122	1	FALSE	Adrenal
MAP65_ASE1	1	579	0.779438	FALSE	Adrenal
MATH	1	126	1	FALSE	Adrenal
MBOAT	1	345	0.991717	FALSE	Adrenal
MBT	1	69	0.978774	FALSE	Adrenal
Med11	1	79	1	FALSE	Adrenal
Med15	1	372	0.988068	FALSE	Adrenal
Med26	1	47	0.546643	FALSE	Adrenal
Mem_trans	1	172	1	FALSE	Adrenal
MENTAL	1	169	1	FALSE	Adrenal
Met_10	1	222	1	FALSE	Adrenal
Metallothio	1	68	0.963245	FALSE	Adrenal
Methyltransf_8	1	220	1	FALSE	Adrenal
MFS_2	1	485	0.865993	FALSE	Adrenal
MGAT2	1	355	0.990317	FALSE	Adrenal
MIF4G_like	1	134	1	FALSE	Adrenal
Miff	1	291	1	FALSE	Adrenal
M-inducer_phosp	1	244	1	FALSE	Adrenal
Mitoc_L55	1	121	1	FALSE	Adrenal
Mitofilin	1	644	0.730971	FALSE	Adrenal
MLIP	1	228	1	FALSE	Adrenal
MMS19_N	1	263	1	FALSE	Adrenal
MMS22L_C	1	378	0.987311	FALSE	Adrenal
Mo25	1	335	0.993179	FALSE	Adrenal
MOR2-PAG1_mid	1	184	1	FALSE	Adrenal
Motile_Sperm	1	106	1	FALSE	Adrenal
MOZ_SAS	1	188	1	FALSE	Adrenal
MPC	1	105	1	FALSE	Adrenal
MRP-S27	1	413	0.951363	FALSE	Adrenal
MRVI1	1	534	0.818054	FALSE	Adrenal
Mtc	1	303	0.998335	FALSE	Adrenal
Mtf2_C	1	51	0.637066	FALSE	Adrenal
Muskelin_N	1	196	1	FALSE	Adrenal
Myb_DNA-bind_5	1	78	1	FALSE	Adrenal
Myelin_MBP	1	67	0.947368	FALSE	Adrenal
N6-adenineMlase	1	160	1	FALSE	Adrenal
NAD_binding_2	1	163	1	FALSE	Adrenal
NAD_binding_3	1	112	1	FALSE	Adrenal
NAD_binding_6	1	155	1	FALSE	Adrenal
NAD_Gly3P_dh_N	1	170	1	FALSE	Adrenal
NADH_oxidored	1	58	0.785651	FALSE	Adrenal
Nckap1	1	1117	0.526587	FALSE	Adrenal
NCKAP5	1	138	1	FALSE	Adrenal
NEP	1	119	1	FALSE	Adrenal
Ninjurin	1	104	1	FALSE	Adrenal
NIPSNAP	1	98	1	FALSE	Adrenal
NO_synthase	1	372	0.988068	FALSE	Adrenal
NODP	1	65	0.914522	FALSE	Adrenal
NOGCT	1	53	0.681417	FALSE	Adrenal
NRDE-2	1	348	0.991291	FALSE	Adrenal
NTF2	1	107	1	FALSE	Adrenal
NTR	1	108	1	FALSE	Adrenal
NUC173	1	199	1	FALSE	Adrenal
Nucleoporin_C	1	573	0.784323	FALSE	Adrenal
Nup84_Nup100	1	704	0.69233	FALSE	Adrenal
Nup96	1	300	0.99886	FALSE	Adrenal
NUT_C	1	142	1	FALSE	Adrenal
OB_NTP_bind	1	128	1	FALSE	Adrenal
Occludin_ELL	1	103	1	FALSE	Adrenal
OCIA	1	109	1	FALSE	Adrenal
ODC_AZ	1	111	1	FALSE	Adrenal
ORMDL	1	136	1	FALSE	Adrenal
OSTMP1	1	247	1	FALSE	Adrenal
OTCace	1	151	1	FALSE	Adrenal
Oxidored_molyb	1	181	1	FALSE	Adrenal
PAC2	1	172	1	FALSE	Adrenal
PACT_coil_coil	1	80	1	FALSE	Adrenal
PAP_assoc	1	55	0.723323	FALSE	Adrenal
ParA	1	53	0.681417	FALSE	Adrenal
Paralemmin	1	332	0.99363	FALSE	Adrenal
PC-Esterase	1	248	1	FALSE	Adrenal
PCRF	1	116	1	FALSE	Adrenal
PDDEXK_1	1	195	1	FALSE	Adrenal
PDE6_gamma	1	83	1	FALSE	Adrenal
Pellino	1	416	0.947369	FALSE	Adrenal
Peptidase_C12	1	207	1	FALSE	Adrenal
Peptidase_C2	1	300	0.99886	FALSE	Adrenal
Peptidase_M18	1	439	0.91812	FALSE	Adrenal
Peptidase_M19	1	322	0.995181	FALSE	Adrenal
Peptidase_M2	1	601	0.762156	FALSE	Adrenal
Peptidase_M3	1	446	0.90967	FALSE	Adrenal
Peptidase_S10	1	423	0.938215	FALSE	Adrenal
Peptidase_S8	1	289	1	FALSE	Adrenal
Period_C	1	210	1	FALSE	Adrenal
Peroxin-13_N	1	157	1	FALSE	Adrenal
PGM_PMM_II	1	111	1	FALSE	Adrenal
PH_9	1	92	1	FALSE	Adrenal
Phosphorylase	1	681	0.706538	FALSE	Adrenal
PHR	1	147	1	FALSE	Adrenal
PI3_PI4_kinase	1	204	1	FALSE	Adrenal
PI3K_1B_p101	1	875	0.607739	FALSE	Adrenal
PI3K_C2	1	143	1	FALSE	Adrenal
PIG-S	1	530	0.821716	FALSE	Adrenal
PIH1	1	260	1	FALSE	Adrenal
PINIT	1	157	1	FALSE	Adrenal
PKD_channel	1	431	0.928027	FALSE	Adrenal
Podoplanin	1	162	1	FALSE	Adrenal
POLO_box	1	72	1	FALSE	Adrenal
POM121	1	79	1	FALSE	Adrenal
Porphobil_deam	1	217	1	FALSE	Adrenal
PPPI_inhib	1	353	0.990592	FALSE	Adrenal
Prefoldin_2	1	106	1	FALSE	Adrenal
Prenylcys_lyase	1	378	0.987311	FALSE	Adrenal
PRK	1	196	1	FALSE	Adrenal
Profilin	1	130	1	FALSE	Adrenal
Pro-kuma_activ	1	144	1	FALSE	Adrenal
PROL5-SMR	1	117	1	FALSE	Adrenal
Propep_M14	1	76	1	FALSE	Adrenal
Pro-rich	1	160	1	FALSE	Adrenal
Proteasom_PSMB	1	504	0.846576	FALSE	Adrenal
Proteasome_A_N	1	23	0.0458311	TRUE	Adrenal
PRP38	1	172	1	FALSE	Adrenal
PseudoU_synth_1	1	108	1	FALSE	Adrenal
PSP	1	49	0.591532	FALSE	Adrenal
PSS	1	283	1	FALSE	Adrenal
PTPA	1	299	0.999037	FALSE	Adrenal
PTR2	1	256	1	FALSE	Adrenal
PTRF_SDPR	1	244	1	FALSE	Adrenal
Pur_DNA_glyco	1	182	1	FALSE	Adrenal
PWI	1	72	1	FALSE	Adrenal
Pyrid_oxidase_2	1	167	1	FALSE	Adrenal
PYRIN	1	84	1	FALSE	Adrenal
Rab_eff_C	1	708	0.68993	FALSE	Adrenal
Racemase_4	1	100	1	FALSE	Adrenal
Rad9	1	253	1	FALSE	Adrenal
Radical_SAM	1	174	1	FALSE	Adrenal
RAG2_PHD	1	78	1	FALSE	Adrenal
Rap1_C	1	82	1	FALSE	Adrenal
RBM39linker	1	85	1	FALSE	Adrenal
RDD	1	161	1	FALSE	Adrenal
REJ	1	470	0.882147	FALSE	Adrenal
Rft-1	1	507	0.84361	FALSE	Adrenal
RHIM	1	53	0.681417	FALSE	Adrenal
Rho_GDI	1	201	1	FALSE	Adrenal
Rhodanese	1	124	1	FALSE	Adrenal
Rhomboid	1	149	1	FALSE	Adrenal
Ribophorin_II	1	627	0.742916	FALSE	Adrenal
Ribosomal_L13e	1	179	1	FALSE	Adrenal
Ribosomal_L16	1	163	1	FALSE	Adrenal
Ribosomal_L22	1	106	1	FALSE	Adrenal
Ribosomal_L35Ae	1	100	1	FALSE	Adrenal
Ribosomal_L41	1	25	0.0734719	TRUE	Adrenal
Ribosomal_L7Ae	1	85	1	FALSE	Adrenal
Ribosomal_S13_N	1	60	0.824915	FALSE	Adrenal
Ribosomal_S2	1	101	1	FALSE	Adrenal
Ribosomal_S5_C	1	74	1	FALSE	Adrenal
Ribul_P_3_epim	1	199	1	FALSE	Adrenal
RimK	1	186	1	FALSE	Adrenal
Ripply	1	89	1	FALSE	Adrenal
RNA_pol_Rpb1_2	1	181	1	FALSE	Adrenal
RNA_pol_Rpb1_3	1	186	1	FALSE	Adrenal
RNA_pol_Rpb1_5	1	715	0.685779	FALSE	Adrenal
RNA_pol_Rpb2_1	1	385	0.98645	FALSE	Adrenal
RNA_pol_Rpb6	1	52	0.659562	FALSE	Adrenal
RNase_Zc3h12a	1	157	1	FALSE	Adrenal
RnaseA	1	127	1	FALSE	Adrenal
RPE65	1	521	0.83011	FALSE	Adrenal
RWD	1	107	1	FALSE	Adrenal
S100PBPR	1	382	0.986816	FALSE	Adrenal
S1-like	1	58	0.785651	FALSE	Adrenal
SAD_SRA	1	173	1	FALSE	Adrenal
SAICAR_synt	1	245	1	FALSE	Adrenal
Sarcoglycan_1	1	193	1	FALSE	Adrenal
SARG	1	569	0.787623	FALSE	Adrenal
SBDS	1	91	1	FALSE	Adrenal
SBF	1	185	1	FALSE	Adrenal
SCA7	1	72	1	FALSE	Adrenal
Sec10	1	619	0.748707	FALSE	Adrenal
Sec16_C	1	273	1	FALSE	Adrenal
Sec23_trunk	1	239	1	FALSE	Adrenal
Sec62	1	223	1	FALSE	Adrenal
Secretogranin_V	1	202	1	FALSE	Adrenal
Selenoprotein_S	1	106	1	FALSE	Adrenal
Ser_hydrolase	1	177	1	FALSE	Adrenal
Shugoshin_N	1	46	0.523108	FALSE	Adrenal
SIR2	1	143	1	FALSE	Adrenal
SLIDE	1	117	1	FALSE	Adrenal
S-methyl_trans	1	300	0.99886	FALSE	Adrenal
Smg4_UPF3	1	169	1	FALSE	Adrenal
SnAPC_2_like	1	334	0.993329	FALSE	Adrenal
Snapin_Pallidin	1	90	1	FALSE	Adrenal
SOBP	1	320	0.995499	FALSE	Adrenal
Solute_trans_a	1	277	1	FALSE	Adrenal
SOUL	1	92	1	FALSE	Adrenal
SPAN-X	1	97	1	FALSE	Adrenal
SPATIAL	1	197	1	FALSE	Adrenal
Spb1_C	1	237	1	FALSE	Adrenal
Spc97_Spc98	1	1371	0.485004	FALSE	Adrenal
SPOC	1	104	1	FALSE	Adrenal
Sprouty	1	109	1	FALSE	Adrenal
SPT6_acidic	1	94	1	FALSE	Adrenal
SQS_PSY	1	256	1	FALSE	Adrenal
SRP54	1	196	1	FALSE	Adrenal
SSXT	1	66	0.931132	FALSE	Adrenal
STAT_alpha	1	182	1	FALSE	Adrenal
STAT_bind	1	254	1	FALSE	Adrenal
Stathmin	1	141	1	FALSE	Adrenal
Steroid_dh	1	150	1	FALSE	Adrenal
Str_synth	1	89	1	FALSE	Adrenal
Strumpellin	1	1081	0.536908	FALSE	Adrenal
Suf	1	275	1	FALSE	Adrenal
Sulfotransfer_2	1	237	1	FALSE	Adrenal
SYCE1	1	124	1	FALSE	Adrenal
Syja_N	1	374	0.987814	FALSE	Adrenal
Synapsin	1	105	1	FALSE	Adrenal
Synuclein	1	126	1	FALSE	Adrenal
TAF4	1	76	1	FALSE	Adrenal
Talin_middle	1	162	1	FALSE	Adrenal
Tankyrase_bdg_C	1	173	1	FALSE	Adrenal
TauD	1	258	1	FALSE	Adrenal
TB2_DP1_HVA22	1	94	1	FALSE	Adrenal
TCR_zetazeta	1	33	0.225518	FALSE	Adrenal
TCRP1	1	195	1	FALSE	Adrenal
TEA	1	266	1	FALSE	Adrenal
Tet_JBP	1	616	0.750907	FALSE	Adrenal
TF_AP-2	1	208	1	FALSE	Adrenal
TFIIA	1	443	0.913267	FALSE	Adrenal
TFIIS_C	1	41	0.405818	FALSE	Adrenal
TFR_dimer	1	124	1	FALSE	Adrenal
TGF_beta	1	108	1	FALSE	Adrenal
TGT	1	286	1	FALSE	Adrenal
THAP	1	97	1	FALSE	Adrenal
Thymidylate_kin	1	182	1	FALSE	Adrenal
Thyroglobulin_1	1	73	1	FALSE	Adrenal
Tim17	1	99	1	FALSE	Adrenal
TIR_2	1	116	1	FALSE	Adrenal
TMCO5	1	59	0.805533	FALSE	Adrenal
TMEM101	1	252	1	FALSE	Adrenal
TMEM151	1	398	0.972008	FALSE	Adrenal
TMEM51	1	235	1	FALSE	Adrenal
Tmemb_161AB	1	442	0.914474	FALSE	Adrenal
Tmemb_cc2	1	404	0.963612	FALSE	Adrenal
TMF_TATA_bd	1	121	1	FALSE	Adrenal
Topoisom_I	1	238	1	FALSE	Adrenal
TORC_M	1	161	1	FALSE	Adrenal
Tox-GHH	1	79	1	FALSE	Adrenal
TP2	1	136	1	FALSE	Adrenal
TPD52	1	159	1	FALSE	Adrenal
TPP_enzyme_C	1	152	1	FALSE	Adrenal
TPR_2	1	33	0.225518	FALSE	Adrenal
TRAM_LAG1_CLN8	1	205	1	FALSE	Adrenal
TRAM1	1	71	1	FALSE	Adrenal
Transglut_C	1	99	1	FALSE	Adrenal
Transglut_core	1	106	1	FALSE	Adrenal
TRAPP	1	151	1	FALSE	Adrenal
TRAPPC-Trs85	1	454	0.900254	FALSE	Adrenal
Trehalase	1	506	0.844596	FALSE	Adrenal
TRH	1	207	1	FALSE	Adrenal
tRNA-synt_2b	1	153	1	FALSE	Adrenal
tRNA-synt_2d	1	140	1	FALSE	Adrenal
Tropomyosin_1	1	68	0.963245	FALSE	Adrenal
TROVE	1	454	0.900254	FALSE	Adrenal
Trp_dioxygenase	1	65	0.914522	FALSE	Adrenal
TSGA13	1	273	1	FALSE	Adrenal
TSP_3	1	36	0.291759	FALSE	Adrenal
Tyr_Deacylase	1	146	1	FALSE	Adrenal
Tyr-DNA_phospho	1	413	0.951363	FALSE	Adrenal
Ufd2P_core	1	644	0.730971	FALSE	Adrenal
UPF0020	1	161	1	FALSE	Adrenal
UPF0061	1	550	0.803785	FALSE	Adrenal
UPF0184	1	83	1	FALSE	Adrenal
UPF0560	1	784	0.647881	FALSE	Adrenal
URO-D	1	347	0.991432	FALSE	Adrenal
vATP-synt_AC39	1	335	0.993179	FALSE	Adrenal
VCBS	1	75	1	FALSE	Adrenal
Vps16_N	1	417	0.946047	FALSE	Adrenal
Vps35	1	741	0.670878	FALSE	Adrenal
Vps52	1	508	0.842627	FALSE	Adrenal
V-SNARE_C	1	66	0.931132	FALSE	Adrenal
VWA_3	1	130	1	FALSE	Adrenal
WAP	1	45	0.498791	FALSE	Adrenal
WD40_alt	1	48	0.569439	FALSE	Adrenal
WHIM3	1	41	0.405818	FALSE	Adrenal
WRW	1	39	0.360402	FALSE	Adrenal
WTX	1	90	1	FALSE	Adrenal
XK-related	1	406	0.960855	FALSE	Adrenal
XRN_N	1	255	1	FALSE	Adrenal
zf-Apc11	1	84	1	FALSE	Adrenal
zf-C3HC4_3	1	46	0.523108	FALSE	Adrenal
zf-CCHC_6	1	40	0.382551	FALSE	Adrenal
zf-CCHH	1	26	0.0887934	TRUE	Adrenal
zf-DBF	1	48	0.569439	FALSE	Adrenal
zf-HC5HC2H	1	93	1	FALSE	Adrenal
zf-RanBP	1	30	0.163114	FALSE	Adrenal
zf-SNAP50_C	1	94	1	FALSE	Adrenal
zf-TRAF	1	57	0.765248	FALSE	Adrenal
zf-TRM13_CCCH	1	31	0.182533	FALSE	Adrenal
zf-UBP	1	60	0.824915	FALSE	Adrenal
P53	1769	681	1.11116e-139	TRUE	Biliary
Ras	1134	11453	2.89898e-06	TRUE	Biliary
Pkinase	848	65172	1	FALSE	Biliary
I-set	657	21670	0.343351	FALSE	Biliary
Cadherin	612	23035	0.486495	FALSE	Biliary
zf-H2C2_2	577	10536	0.021767	TRUE	Biliary
fn3	484	15387	0.310412	FALSE	Biliary
7tm_1	465	50731	1	FALSE	Biliary
Pkinase_Tyr	412	22471	0.959313	FALSE	Biliary
Ank_2	392	11470	0.239243	FALSE	Biliary
Ion_trans	392	23442	1	FALSE	Biliary
7tm_4	295	26594	1	FALSE	Biliary
WD40	258	3908	0.00370808	TRUE	Biliary
Spectrin	249	8781	0.413442	FALSE	Biliary
Collagen	229	7255	0.307314	FALSE	Biliary
Ig_2	197	8378	0.635851	FALSE	Biliary
Iso_dh	183	1097	7.93417e-15	TRUE	Biliary
CUB	166	7124	0.647348	FALSE	Biliary
PDZ	155	5226	0.366637	FALSE	Biliary
PH	155	8239	0.926261	FALSE	Biliary
Laminin_G_2	150	6117	0.582004	FALSE	Biliary
Sushi	150	3854	0.148334	FALSE	Biliary
Myosin_head	149	21444	1	FALSE	Biliary
EGF_CA	145	3078	0.0589728	TRUE	Biliary
C2	144	5452	0.493443	FALSE	Biliary
V-set	141	7959	1	FALSE	Biliary
Trypsin	140	15053	1	FALSE	Biliary
LRR_8	129	4525	0.407941	FALSE	Biliary
Hormone_recep	128	7801	1	FALSE	Biliary
p450	126	21123	1	FALSE	Biliary
VWA	126	8982	1	FALSE	Biliary
Furin-like	125	1130	1.31865e-07	TRUE	Biliary
ANF_receptor	119	10696	1	FALSE	Biliary
MFS_1	115	17813	1	FALSE	Biliary
RhoGEF	115	7044	1	FALSE	Biliary
Bromodomain	111	1885	0.0120001	TRUE	Biliary
RRM_1	110	4676	0.635289	FALSE	Biliary
UCH	106	16257	1	FALSE	Biliary
BTB	98	5686	1	FALSE	Biliary
Filament	96	15767	1	FALSE	Biliary
PI3Ka	91	1359	0.0032531	TRUE	Biliary
Mito_carr	90	4697	0.902459	FALSE	Biliary
TSP_1	89	2456	0.194271	FALSE	Biliary
KRAB	88	1899	0.0640565	TRUE	Biliary
CH	87	3827	0.678362	FALSE	Biliary
G-alpha	86	4194	0.813818	FALSE	Biliary
MIP	85	1769	0.0529048	TRUE	Biliary
Y_phosphatase	84	6327	1	FALSE	Biliary
Myosin_tail_1	83	11098	1	FALSE	Biliary
AMP-binding	82	12760	1	FALSE	Biliary
Sema	82	9409	1	FALSE	Biliary
SH2	82	3027	0.46342	FALSE	Biliary
Homeobox	81	2982	0.460186	FALSE	Biliary
EF-hand_7	79	3395	0.649085	FALSE	Biliary
EGF	79	1393	0.0164794	TRUE	Biliary
Nebulin	78	636	4.23002e-09	TRUE	Biliary
Kinesin	77	10040	1	FALSE	Biliary
MH2	77	960	0.000259978	TRUE	Biliary
Sugar_tr	77	10461	1	FALSE	Biliary
DEAD	76	6366	1	FALSE	Biliary
E1-E2_ATPase	75	6636	1	FALSE	Biliary
RhoGAP	75	4887	1	FALSE	Biliary
7tm_2	72	7809	1	FALSE	Biliary
ABC_membrane	72	8792	1	FALSE	Biliary
RabGAP-TBC	72	5423	1	FALSE	Biliary
PI3_PI4_kinase	68	3429	0.85728	FALSE	Biliary
Lectin_C	67	4239	1	FALSE	Biliary
LIM	67	2214	0.345335	FALSE	Biliary
SNF2_N	67	7285	1	FALSE	Biliary
Sulfotransfer_1	67	6113	1	FALSE	Biliary
COesterase	65	6534	1	FALSE	Biliary
Kelch_1	64	1995	0.292768	FALSE	Biliary
SNF	64	8178	1	FALSE	Biliary
Helicase_C	63	2309	0.454844	FALSE	Biliary
Reprolysin	62	4699	1	FALSE	Biliary
SPRY	62	4292	1	FALSE	Biliary
ABC2_membrane_3	61	6914	1	FALSE	Biliary
Neur_chan_LBD	61	5792	1	FALSE	Biliary
SET	60	3751	1	FALSE	Biliary
Laminin_EGF	59	2111	0.428315	FALSE	Biliary
Serpin	59	8520	1	FALSE	Biliary
Actin	58	9816	1	FALSE	Biliary
Filamin	58	2500	0.65286	FALSE	Biliary
Recep_L_domain	56	865	0.00473981	TRUE	Biliary
ABC_tran	55	4435	1	FALSE	Biliary
An_peroxidase	55	5708	1	FALSE	Biliary
Ets	55	1043	0.0288056	TRUE	Biliary
Dynein_heavy	54	10055	1	FALSE	Biliary
Integrin_alpha2	54	6717	1	FALSE	Biliary
zf-C2H2	54	893	0.00942517	TRUE	Biliary
Peptidase_C12	53	419	1.07313e-09	TRUE	Biliary
Sulfatase	50	5047	1	FALSE	Biliary
Neur_chan_memb	49	4674	1	FALSE	Biliary
Peptidase_M14	48	5583	1	FALSE	Biliary
SAM_1	48	1353	0.21072	FALSE	Biliary
Cullin	47	4725	1	FALSE	Biliary
Laminin_N	47	2161	0.736377	FALSE	Biliary
RCC1	47	725	0.00466044	TRUE	Biliary
SRCR	46	2360	0.880075	FALSE	Biliary
Exo_endo_phos	45	5416	1	FALSE	Biliary
RasGEF	45	3078	1	FALSE	Biliary
Plexin_cytopl	44	5089	1	FALSE	Biliary
DHC_N2	43	4729	1	FALSE	Biliary
PDEase_I	43	3474	1	FALSE	Biliary
Plectin	43	479	3.1069e-05	TRUE	Biliary
7tm_3	42	3664	1	FALSE	Biliary
BAH	42	972	0.0926903	TRUE	Biliary
Hydrolase	42	5590	1	FALSE	Biliary
Med23	42	1313	0.295364	FALSE	Biliary
Aldedh	41	5795	1	FALSE	Biliary
Glyco_transf_29	41	3344	1	FALSE	Biliary
HECT	41	5388	1	FALSE	Biliary
Lig_chan	41	3599	1	FALSE	Biliary
MH1	41	400	1.30134e-06	TRUE	Biliary
Pep_M12B_propep	41	2479	1	FALSE	Biliary
PID	41	2766	1	FALSE	Biliary
F5_F8_type_C	40	2048	0.877396	FALSE	Biliary
HCO3_cotransp	40	4347	1	FALSE	Biliary
Ldl_recept_a	40	1231	0.281184	FALSE	Biliary
MHC_I	40	1421	0.420995	FALSE	Biliary
VWD	40	3293	1	FALSE	Biliary
AF-4	39	5107	1	FALSE	Biliary
C2-set_2	39	1567	0.562698	FALSE	Biliary
DHC_N1	39	3738	1	FALSE	Biliary
HLH	39	1531	0.535705	FALSE	Biliary
RasGAP	39	1088	0.202726	FALSE	Biliary
Adaptin_N	38	5718	1	FALSE	Biliary
Cadherin_C	38	2448	1	FALSE	Biliary
MAGE	38	3783	1	FALSE	Biliary
PX	38	2053	0.947185	FALSE	Biliary
SCAN	38	1582	0.608662	FALSE	Biliary
TTL	38	3583	1	FALSE	Biliary
Anoctamin	37	5328	1	FALSE	Biliary
BACK	37	2196	1	FALSE	Biliary
Na_H_Exchanger	37	4727	1	FALSE	Biliary
NACHT	37	2350	1	FALSE	Biliary
PLAT	37	1679	0.718778	FALSE	Biliary
TAS2R	37	4183	1	FALSE	Biliary
TPR_11	37	1558	0.623225	FALSE	Biliary
Aa_trans	36	5541	1	FALSE	Biliary
Glyco_hydro_31	36	3802	1	FALSE	Biliary
OATP	36	5559	1	FALSE	Biliary
Peptidase_C14	36	2399	1	FALSE	Biliary
Vinculin	36	3856	1	FALSE	Biliary
AA_permease	35	3366	1	FALSE	Biliary
C1_1	35	704	0.0423069	TRUE	Biliary
FAT	35	2029	1	FALSE	Biliary
FH2	35	4138	1	FALSE	Biliary
HSP70	35	6342	1	FALSE	Biliary
SMC_N	35	7529	1	FALSE	Biliary
Cpn60_TCP1	34	5380	1	FALSE	Biliary
DUF3497	34	1848	0.954898	FALSE	Biliary
FERM_M	34	2281	1	FALSE	Biliary
Hist_deacetyl	34	2325	1	FALSE	Biliary
Metallophos	34	3781	1	FALSE	Biliary
RGS	34	2148	1	FALSE	Biliary
SH3_1	34	810	0.10709	FALSE	Biliary
TIG	34	1512	0.691932	FALSE	Biliary
Aminotran_1_2	33	3703	1	FALSE	Biliary
Ank	33	452	0.00110639	TRUE	Biliary
CNH	33	3479	1	FALSE	Biliary
DOCK-C2	33	1535	0.751813	FALSE	Biliary
Histone	33	1752	0.924706	FALSE	Biliary
Patched	33	3474	1	FALSE	Biliary
zf-DHHC	33	2045	1	FALSE	Biliary
Band_3_cyto	32	2433	1	FALSE	Biliary
Cyclin_N	32	1352	0.627514	FALSE	Biliary
Gla	32	189	3.09531e-15	TRUE	Biliary
Peptidase_M1	32	3475	1	FALSE	Biliary
PHD	32	870	0.184356	FALSE	Biliary
C1-set	31	1411	0.722847	FALSE	Biliary
DSPc	31	1667	0.941184	FALSE	Biliary
Glypican	31	3347	1	FALSE	Biliary
Ig_3	31	1358	0.67318	FALSE	Biliary
Keratin_B2_2	31	951	0.278301	FALSE	Biliary
RRM_6	31	1036	0.3573	FALSE	Biliary
SH3_2	31	751	0.115833	FALSE	Biliary
UQ_con	31	2071	1	FALSE	Biliary
zf-C4	31	1086	0.406606	FALSE	Biliary
adh_short	30	2969	1	FALSE	Biliary
CRAL_TRIO_2	30	1166	0.52413	FALSE	Biliary
dsrm	30	999	0.353509	FALSE	Biliary
FAM47	30	1650	0.969973	FALSE	Biliary
UPF0640	30	55	2.24626e-68	TRUE	Biliary
Arf	29	2108	1	FALSE	Biliary
BTB_2	29	1314	0.716762	FALSE	Biliary
HAD	29	5456	1	FALSE	Biliary
HMG_box	29	1125	0.521925	FALSE	Biliary
IRK	29	4003	1	FALSE	Biliary
MIR	29	1397	0.797861	FALSE	Biliary
FCH	28	841	0.258997	FALSE	Biliary
MAM	28	2253	1	FALSE	Biliary
Peptidase_M2	28	1911	1	FALSE	Biliary
TUDOR	28	1774	1	FALSE	Biliary
cNMP_binding	27	1156	0.644373	FALSE	Biliary
T-box	27	2546	1	FALSE	Biliary
TGFb_propeptide	27	4562	1	FALSE	Biliary
wnt	27	4159	1	FALSE	Biliary
AA_permease_2	26	4403	1	FALSE	Biliary
AAA_6	26	2435	1	FALSE	Biliary
DAGAT	26	1644	1	FALSE	Biliary
DNA_pol_B	26	1824	1	FALSE	Biliary
Pkinase_C	26	462	0.0176527	TRUE	Biliary
WTX	26	1118	0.649828	FALSE	Biliary
AAA	25	2008	1	FALSE	Biliary
AAA_7	25	2979	1	FALSE	Biliary
ADAM_spacer1	25	1460	1	FALSE	Biliary
Aldo_ket_red	25	2599	1	FALSE	Biliary
Amino_oxidase	25	2935	1	FALSE	Biliary
Cadherin_2	25	1352	0.948458	FALSE	Biliary
Carb_anhydrase	25	2923	1	FALSE	Biliary
Carn_acyltransf	25	4107	1	FALSE	Biliary
Ephrin_lbd	25	1696	1	FALSE	Biliary
KH_1	25	813	0.330518	FALSE	Biliary
Proteasome	25	1585	1	FALSE	Biliary
Pyr_redox_2	25	1529	1	FALSE	Biliary
SEA	25	1279	0.876367	FALSE	Biliary
TRAM_LAG1_CLN8	25	2320	1	FALSE	Biliary
ASC	24	3743	1	FALSE	Biliary
DAGK_cat	24	906	0.489977	FALSE	Biliary
E1_dh	24	1958	1	FALSE	Biliary
GAF	24	1349	0.997424	FALSE	Biliary
Lipocalin	24	1485	1	FALSE	Biliary
PMP22_Claudin	24	3195	1	FALSE	Biliary
PP2C	24	2672	1	FALSE	Biliary
Ribophorin_II	24	627	0.159057	FALSE	Biliary
SH3_9	24	881	0.456722	FALSE	Biliary
SSF	24	3786	1	FALSE	Biliary
DUF3518	23	514	0.0785042	TRUE	Biliary
EF-hand_8	23	759	0.343891	FALSE	Biliary
Glycos_transf_2	23	1979	1	FALSE	Biliary
KCNQ_channel	23	955	0.60527	FALSE	Biliary
Myotub-related	23	3345	1	FALSE	Biliary
RRM_5	23	755	0.338763	FALSE	Biliary
UDPGT	23	4331	1	FALSE	Biliary
zf-B_box	23	526	0.0878973	TRUE	Biliary
AAA_12	22	1608	1	FALSE	Biliary
CHGN	22	3352	1	FALSE	Biliary
Crystall	22	1004	0.726383	FALSE	Biliary
FGF	22	1508	1	FALSE	Biliary
Fibrinogen_C	22	2499	1	FALSE	Biliary
Glyco_hydro_1	22	3208	1	FALSE	Biliary
Glyco_transf_10	22	2550	1	FALSE	Biliary
Guanylate_cyc	22	2101	1	FALSE	Biliary
LRR_4	22	703	0.314975	FALSE	Biliary
MCM	22	1823	1	FALSE	Biliary
Na_trans_assoc	22	1635	1	FALSE	Biliary
Peptidase_C2	22	2587	1	FALSE	Biliary
Protocadherin	22	1109	0.856822	FALSE	Biliary
Tetraspannin	22	3469	1	FALSE	Biliary
Thioredoxin	22	1384	1	FALSE	Biliary
VWA_3	22	1243	1	FALSE	Biliary
AAA_8	21	2362	1	FALSE	Biliary
ADH_zinc_N	21	818	0.52669	FALSE	Biliary
Calx-beta	21	1365	1	FALSE	Biliary
CPSase_L_D2	21	1242	1	FALSE	Biliary
DENN	21	1477	1	FALSE	Biliary
Fork_head	21	1343	1	FALSE	Biliary
Ion_trans_2	21	879	0.615586	FALSE	Biliary
Kazal_2	21	550	0.160661	FALSE	Biliary
Ldl_recept_b	21	748	0.423708	FALSE	Biliary
MYT1	21	878	0.614129	FALSE	Biliary
OLF	21	2296	1	FALSE	Biliary
Peptidase_S9	21	1517	1	FALSE	Biliary
PSI	21	574	0.187713	FALSE	Biliary
TGF_beta	21	1569	1	FALSE	Biliary
VWC	21	678	0.324128	FALSE	Biliary
Zip	21	2859	1	FALSE	Biliary
DNA_methylase	20	987	0.829161	FALSE	Biliary
DNA_pol_B_exo1	20	1477	1	FALSE	Biliary
ERG4_ERG24	20	923	0.741335	FALSE	Biliary
PI3K_C2	20	857	0.645412	FALSE	Biliary
PLDc_3	20	361	0.0200272	TRUE	Biliary
Septin	20	1975	1	FALSE	Biliary
SGT1	20	585	0.238979	FALSE	Biliary
Sulfotransfer_2	20	1899	1	FALSE	Biliary
Tubulin	20	2266	1	FALSE	Biliary
Tubulin_C	20	1276	1	FALSE	Biliary
UPF0560	20	2396	1	FALSE	Biliary
zf-RanBP	20	118	2.74863e-15	TRUE	Biliary
ArfGap	19	1230	1	FALSE	Biliary
ARID	19	511	0.177535	FALSE	Biliary
BRCT	19	968	0.870876	FALSE	Biliary
C4	19	781	0.592284	FALSE	Biliary
DUF3451	19	901	0.777283	FALSE	Biliary
Dynamin_M	19	1477	1	FALSE	Biliary
Gelsolin	19	1031	0.952785	FALSE	Biliary
ig	19	833	0.674197	FALSE	Biliary
MARVEL	19	1782	1	FALSE	Biliary
MT	19	2587	1	FALSE	Biliary
Neurexophilin	19	1122	1	FALSE	Biliary
PRY	19	631	0.350655	FALSE	Biliary
PWWP	19	653	0.386734	FALSE	Biliary
Ricin_B_lectin	19	1066	0.995117	FALSE	Biliary
RUN	19	939	0.831014	FALSE	Biliary
SAM_2	19	725	0.502626	FALSE	Biliary
Zona_pellucida	19	2306	1	FALSE	Biliary
AIG1	18	1176	1	FALSE	Biliary
DnaJ	18	506	0.208627	FALSE	Biliary
DUF4546	18	207	6.1708e-05	TRUE	Biliary
EF-hand_3	18	99	1.14546e-16	TRUE	Biliary
Epimerase	18	1403	1	FALSE	Biliary
Frizzled	18	2301	1	FALSE	Biliary
Glyco_transf_8	18	1764	1	FALSE	Biliary
GTP_EFTU	18	2522	1	FALSE	Biliary
Guanylate_kin	18	1178	1	FALSE	Biliary
GVQW	18	387	0.0628522	TRUE	Biliary
Latrophilin	18	700	0.524794	FALSE	Biliary
LCE	18	856	0.781003	FALSE	Biliary
Med12-LCEWAV	18	1361	1	FALSE	Biliary
PNP_UDP_1	18	636	0.415434	FALSE	Biliary
RasGEF_N	18	1066	1	FALSE	Biliary
RB_A	18	653	0.44256	FALSE	Biliary
ADAM_CR	17	478	0.208806	FALSE	Biliary
Adap_comp_sub	17	1482	1	FALSE	Biliary
Annexin	17	659	0.521072	FALSE	Biliary
bZIP_Maf	17	825	0.80747	FALSE	Biliary
C1q	17	1539	1	FALSE	Biliary
Cation_ATPase_C	17	1823	1	FALSE	Biliary
Cation_efflux	17	2059	1	FALSE	Biliary
CD20	17	898	0.918171	FALSE	Biliary
Clathrin	17	968	1	FALSE	Biliary
COLFI	17	1509	1	FALSE	Biliary
Cystatin	17	1214	1	FALSE	Biliary
Gasdermin	17	1629	1	FALSE	Biliary
GKAP	17	1386	1	FALSE	Biliary
Hexokinase_1	17	1439	1	FALSE	Biliary
His_Phos_1	17	1429	1	FALSE	Biliary
Laminin_G_3	17	1891	1	FALSE	Biliary
MFS_2	17	2514	1	FALSE	Biliary
Na_sulph_symp	17	2900	1	FALSE	Biliary
PARP	17	2244	1	FALSE	Biliary
Pentaxin	17	1351	1	FALSE	Biliary
Peptidase_C48	17	793	0.755568	FALSE	Biliary
Peptidase_M24	17	1381	1	FALSE	Biliary
Phosphodiest	17	2403	1	FALSE	Biliary
PI3K_rbd	17	634	0.475594	FALSE	Biliary
Pro-rich	17	544	0.31624	FALSE	Biliary
Rhodanese	17	1423	1	FALSE	Biliary
V_ATPase_I	17	3067	1	FALSE	Biliary
zf-CCCH	17	160	4.81335e-07	TRUE	Biliary
Ago_hook	16	429	0.175599	FALSE	Biliary
Arm	16	530	0.347915	FALSE	Biliary
Calpain_III	16	935	1	FALSE	Biliary
CAP_GLY	16	267	0.0103074	TRUE	Biliary
Ded_cyto	16	1129	1	FALSE	Biliary
DUF2476	16	784	0.819976	FALSE	Biliary
FERM_C	16	808	0.859212	FALSE	Biliary
HEAT_2	16	1054	1	FALSE	Biliary
hSH3	16	89	1.94888e-16	TRUE	Biliary
IPK	16	1344	1	FALSE	Biliary
LMBR1	16	2072	1	FALSE	Biliary
Mab-21	16	2177	1	FALSE	Biliary
MOR2-PAG1_N	16	1068	1	FALSE	Biliary
Na_Ca_ex	16	1100	1	FALSE	Biliary
START	16	1522	1	FALSE	Biliary
Tet_JBP	16	1802	1	FALSE	Biliary
TNF	16	1030	1	FALSE	Biliary
Tropomyosin	16	797	0.841149	FALSE	Biliary
XK-related	16	1914	1	FALSE	Biliary
7TM_GPCR_Srsx	15	1783	1	FALSE	Biliary
Acyltransferase	15	1128	1	FALSE	Biliary
CTNNB1_binding	15	722	0.796802	FALSE	Biliary
Cyclin_C	15	1055	1	FALSE	Biliary
DAO	15	1731	1	FALSE	Biliary
DEP	15	559	0.47472	FALSE	Biliary
DPPIV_N	15	1900	1	FALSE	Biliary
Drf_GBD	15	728	0.807575	FALSE	Biliary
DUF3583	15	332	0.0745464	TRUE	Biliary
FKBP_C	15	712	0.778546	FALSE	Biliary
Gal-bind_lectin	15	1354	1	FALSE	Biliary
GDA1_CD39	15	2616	1	FALSE	Biliary
Glyco_hydro_47	15	2708	1	FALSE	Biliary
GRAM	15	426	0.216499	FALSE	Biliary
IMD	15	536	0.426989	FALSE	Biliary
IQ	15	229	0.00405172	TRUE	Biliary
LBP_BPI_CETP_C	15	1128	1	FALSE	Biliary
Lipase	15	1887	1	FALSE	Biliary
MBOAT	15	2603	1	FALSE	Biliary
NCKAP5	15	824	0.968432	FALSE	Biliary
NYAP_N	15	1146	1	FALSE	Biliary
Pellino	15	1342	1	FALSE	Biliary
Peptidase_M13_N	15	2753	1	FALSE	Biliary
Peptidase_S8	15	2714	1	FALSE	Biliary
PI-PLC-X	15	1073	1	FALSE	Biliary
Piwi	15	2075	1	FALSE	Biliary
PTEN_C2	15	421	0.207405	FALSE	Biliary
Pyridoxal_deC	15	2036	1	FALSE	Biliary
Sec1	15	2996	1	FALSE	Biliary
Sulfate_transp	15	1138	1	FALSE	Biliary
TEA	15	1724	1	FALSE	Biliary
ThiF	15	943	1	FALSE	Biliary
Transferrin	15	1309	1	FALSE	Biliary
Tweety	15	1359	1	FALSE	Biliary
zf-C3HC4	15	424	0.21288	FALSE	Biliary
zf-RING_2	15	498	0.350318	FALSE	Biliary
14-3-3	14	1178	1	FALSE	Biliary
5_nucleotid	14	1271	1	FALSE	Biliary
A_deamin	14	1723	1	FALSE	Biliary
Alpha_kinase	14	971	1	FALSE	Biliary
BAR	14	1096	1	FALSE	Biliary
BEN	14	410	0.239902	FALSE	Biliary
C8	14	511	0.449901	FALSE	Biliary
CATSPERD	14	1380	1	FALSE	Biliary
CHRD	14	117	8.88577e-09	TRUE	Biliary
CLN5	14	363	0.154211	FALSE	Biliary
CRAL_TRIO	14	1041	1	FALSE	Biliary
CTF_NFI	14	588	0.619943	FALSE	Biliary
FAM178	14	740	0.918995	FALSE	Biliary
FERM_N	14	985	1	FALSE	Biliary
Ferric_reduct	14	1054	1	FALSE	Biliary
FGGY_N	14	1387	1	FALSE	Biliary
Fox-1_C	14	237	0.0116964	TRUE	Biliary
HAD_2	14	791	1	FALSE	Biliary
HOOK	14	3183	0.997548	FALSE	Biliary
IBR	14	395	0.211452	FALSE	Biliary
Laminin_I	14	1328	1	FALSE	Biliary
MAGE_N	14	632	0.711778	FALSE	Biliary
MBT	14	579	0.600161	FALSE	Biliary
Oxysterol_BP	14	1535	1	FALSE	Biliary
PAS	14	599	0.643513	FALSE	Biliary
RA	14	638	0.724475	FALSE	Biliary
TAN	14	306	0.0693647	TRUE	Biliary
Ten_N	14	864	1	FALSE	Biliary
Topoisom_bac	14	828	1	FALSE	Biliary
Voltage_CLC	14	3031	1	FALSE	Biliary
zf-HC5HC2H	14	317	0.0838557	TRUE	Biliary
A_deaminase	13	1535	1	FALSE	Biliary
Asp	13	2260	1	FALSE	Biliary
BicD	13	1445	1	FALSE	Biliary
Citrate_synt	13	580	0.695964	FALSE	Biliary
Clat_adaptor_s	13	1221	1	FALSE	Biliary
Connexin	13	962	1	FALSE	Biliary
CTP_transf_2	13	1059	1	FALSE	Biliary
Dapper	13	871	1	FALSE	Biliary
DUF2450	13	437	0.363482	FALSE	Biliary
DUF3694	13	247	0.0292343	TRUE	Biliary
ECH	13	2507	1	FALSE	Biliary
EMP70	13	2095	1	FALSE	Biliary
Fascin	13	548	0.62461	FALSE	Biliary
FHA	13	582	0.700561	FALSE	Biliary
Fz	13	576	0.687371	FALSE	Biliary
GBP_C	13	1909	1	FALSE	Biliary
JAB	13	895	1	FALSE	Biliary
Miro	13	833	1	FALSE	Biliary
Peptidase_C54	13	1225	1	FALSE	Biliary
Peptidase_M10	13	1749	1	FALSE	Biliary
Peptidase_M13	13	890	1	FALSE	Biliary
PI-PLC-Y	13	577	0.689528	FALSE	Biliary
Pro_isomerase	13	1253	1	FALSE	Biliary
Rap_GAP	13	936	1	FALSE	Biliary
RyR	13	659	0.864245	FALSE	Biliary
TPR_1	13	259	0.0397214	TRUE	Biliary
Tubulin-binding	13	95	5.57775e-11	TRUE	Biliary
Xlink	13	842	1	FALSE	Biliary
zf-C3HC4_3	13	384	0.246387	FALSE	Biliary
AAA_9	12	1492	1	FALSE	Biliary
Abhydrolase_3	12	836	1	FALSE	Biliary
Abhydrolase_6	12	2360	1	FALSE	Biliary
AKAP_110	12	1446	1	FALSE	Biliary
ANTH	12	807	1	FALSE	Biliary
APOBEC_N	12	899	1	FALSE	Biliary
Arfaptin	12	914	1	FALSE	Biliary
Asp-B-Hydro_N	12	496	0.599419	FALSE	Biliary
Bcl-2	12	309	0.149757	FALSE	Biliary
bZIP_1	12	453	0.489977	FALSE	Biliary
Cation_ATPase_N	12	410	0.380579	FALSE	Biliary
CCDC14	12	248	0.0507444	TRUE	Biliary
CEP170_C	12	1365	1	FALSE	Biliary
CS	12	392	0.334483	FALSE	Biliary
DUF3384	12	422	0.410561	FALSE	Biliary
DUF4589	12	481	0.559703	FALSE	Biliary
Dynamin_N	12	1247	1	FALSE	Biliary
Fasciclin	12	864	1	FALSE	Biliary
FMO-like	12	1870	1	FALSE	Biliary
G_glu_transpept	12	1796	1	FALSE	Biliary
GBP	12	1611	1	FALSE	Biliary
Hemopexin	12	458	0.502896	FALSE	Biliary
Hexokinase_2	12	1440	1	FALSE	Biliary
HRM	12	390	0.329975	FALSE	Biliary
HSP90	12	2016	1	FALSE	Biliary
Ins145_P3_rec	12	1098	1	FALSE	Biliary
JmjC	12	622	0.89353	FALSE	Biliary
Kunitz_BPTI	12	318	0.16816	FALSE	Biliary
Lipoxygenase	12	2439	1	FALSE	Biliary
NHS	12	1301	1	FALSE	Biliary
PEPCK	12	1041	1	FALSE	Biliary
Phosphorylase	12	2094	1	FALSE	Biliary
Prog_receptor	12	564	0.765536	FALSE	Biliary
SAM_PNT	12	417	0.398226	FALSE	Biliary
Sec7	12	1310	1	FALSE	Biliary
Serum_albumin	12	1128	1	FALSE	Biliary
Spc97_Spc98	12	2534	1	FALSE	Biliary
STAS	12	861	1	FALSE	Biliary
STAT_bind	12	1009	1	FALSE	Biliary
tRNA-synt_2	12	1780	1	FALSE	Biliary
UBA	12	218	0.0209976	TRUE	Biliary
UPF0564	12	353	0.243273	FALSE	Biliary
Urocanase	12	579	0.799958	FALSE	Biliary
Activin_recp	11	389	0.416316	FALSE	Biliary
AKAP2_C	11	647	1	FALSE	Biliary
APG5	11	158	0.00198644	TRUE	Biliary
BEX	11	1217	1	FALSE	Biliary
Branch	11	1058	1	FALSE	Biliary
Choline_transpo	11	1501	1	FALSE	Biliary
CIMR	11	1307	1	FALSE	Biliary
CwfJ_C_1	11	125	4.52063e-05	TRUE	Biliary
DDHD	11	1103	1	FALSE	Biliary
Disintegrin	11	537	0.815166	FALSE	Biliary
Dpy19	11	2655	0.993589	FALSE	Biliary
Drf_FH1	11	378	0.386588	FALSE	Biliary
DUF1669	11	1724	1	FALSE	Biliary
EF-hand_like	11	240	0.0686258	TRUE	Biliary
FAM75	11	741	1	FALSE	Biliary
Fumble	11	1250	1	FALSE	Biliary
FYVE_2	11	537	0.815166	FALSE	Biliary
Galactosyl_T	11	1552	1	FALSE	Biliary
Glyco_hydro_39	11	521	0.775691	FALSE	Biliary
HAP1_N	11	866	1	FALSE	Biliary
Integrin_beta	11	2449	0.998966	FALSE	Biliary
IP_trans	11	750	1	FALSE	Biliary
JCAD	11	1348	1	FALSE	Biliary
Kringle	11	635	1	FALSE	Biliary
Lig_chan-Glu_bd	11	196	0.0180707	TRUE	Biliary
MACPF	11	1219	1	FALSE	Biliary
Nckap1	11	2237	1	FALSE	Biliary
NKAIN	11	689	1	FALSE	Biliary
NUDIX	11	1086	1	FALSE	Biliary
PAP2	11	420	0.503361	FALSE	Biliary
PC-Esterase	11	1187	1	FALSE	Biliary
PDGF	11	344	0.295676	FALSE	Biliary
Rad51	11	1336	1	FALSE	Biliary
RNase_PH	11	863	1	FALSE	Biliary
RNase_T	11	1064	1	FALSE	Biliary
Serinc	11	1766	1	FALSE	Biliary
Somatomedin_B	11	130	9.90936e-05	TRUE	Biliary
SWIB	11	272	0.126432	FALSE	Biliary
TB	11	339	0.282455	FALSE	Biliary
TIL	11	495	0.707506	FALSE	Biliary
Tmemb_161AB	11	725	1	FALSE	Biliary
tRNA-synt_1	11	3474	0.914139	FALSE	Biliary
VWA_N	11	361	0.338552	FALSE	Biliary
zf-FCS	11	336	0.274381	FALSE	Biliary
AAA_5	10	816	1	FALSE	Biliary
Androgen_recep	10	444	0.689959	FALSE	Biliary
Atrophin-1	10	1841	1	FALSE	Biliary
B56	10	1777	1	FALSE	Biliary
Band_7	10	1160	1	FALSE	Biliary
BRO1	10	1531	1	FALSE	Biliary
Cache_1	10	92	2.07248e-07	TRUE	Biliary
Cast	10	1563	1	FALSE	Biliary
COPIIcoated_ERV	10	219	0.0701752	TRUE	Biliary
Copine	10	882	1	FALSE	Biliary
Cupin_8	10	770	1	FALSE	Biliary
DAGK_acc	10	649	1	FALSE	Biliary
Death	10	575	1	FALSE	Biliary
DNA_pol_phi	10	909	1	FALSE	Biliary
DSPn	10	234	0.0976428	TRUE	Biliary
E2F_TDP	10	433	0.658591	FALSE	Biliary
Folate_carrier	10	1396	1	FALSE	Biliary
GLE1	10	259	0.153501	FALSE	Biliary
Glyco_hydro_38C	10	2166	1	FALSE	Biliary
Glyco_transf_43	10	212	0.0585758	TRUE	Biliary
Glyco_transf_64	10	1235	1	FALSE	Biliary
Helicase_C_2	10	548	0.965342	FALSE	Biliary
IQ-like	10	194	0.0338707	TRUE	Biliary
ITI_HC_C	10	344	0.387692	FALSE	Biliary
LRRNT	10	131	0.000583603	TRUE	Biliary
MRVI1	10	1127	1	FALSE	Biliary
MyTH4	10	453	0.716455	FALSE	Biliary
NAGidase	10	602	1	FALSE	Biliary
Neurochondrin	10	608	1	FALSE	Biliary
NO_synthase	10	1116	1	FALSE	Biliary
Nuc_sug_transp	10	778	1	FALSE	Biliary
Nup153	10	522	0.902736	FALSE	Biliary
P2X_receptor	10	2192	1	FALSE	Biliary
PA26	10	904	1	FALSE	Biliary
Patatin	10	1028	1	FALSE	Biliary
PNMA	10	1809	1	FALSE	Biliary
POM121	10	583	1	FALSE	Biliary
PRK	10	385	0.513079	FALSE	Biliary
PTR2	10	2015	1	FALSE	Biliary
Pyrophosphatase	10	370	0.466175	FALSE	Biliary
RHD	10	843	1	FALSE	Biliary
Rhomboid	10	611	1	FALSE	Biliary
SNARE	10	248	0.127942	FALSE	Biliary
STAT_int	10	367	0.45645	FALSE	Biliary
TPR_12	10	549	0.96766	FALSE	Biliary
TPT	10	605	1	FALSE	Biliary
tRNA-synt_2b	10	1157	1	FALSE	Biliary
ubiquitin	10	473	0.773922	FALSE	Biliary
V-ATPase_C	10	712	1	FALSE	Biliary
zf-CXXC	10	94	4.66352e-07	TRUE	Biliary
zf-met	10	176	0.0161941	TRUE	Biliary
A2M_comp	9	1338	1	FALSE	Biliary
AAA_33	9	585	1	FALSE	Biliary
Acetyltransf_1	9	509	1	FALSE	Biliary
ADK	9	962	1	FALSE	Biliary
Biopterin_H	9	996	1	FALSE	Biliary
Biotin_carb_C	9	216	0.110953	FALSE	Biliary
BK_channel_a	9	205	0.0862683	TRUE	Biliary
CDC73	9	603	1	FALSE	Biliary
CLASP_N	9	793	1	FALSE	Biliary
Cofilin_ADF	9	262	0.235374	FALSE	Biliary
DCX	9	183	0.045694	TRUE	Biliary
DUF3398	9	288	0.31624	FALSE	Biliary
DUF4206	9	484	0.94127	FALSE	Biliary
EamA	9	871	1	FALSE	Biliary
EphA2_TM	9	298	0.347469	FALSE	Biliary
EPL1	9	569	1	FALSE	Biliary
FAD-oxidase_C	9	1071	1	FALSE	Biliary
FXa_inhibition	9	260	0.22955	FALSE	Biliary
Gal_Lectin	9	162	0.0196084	TRUE	Biliary
Gal-3-0_sulfotr	9	1033	1	FALSE	Biliary
GAT	9	404	0.704168	FALSE	Biliary
Glyco_hydro_18	9	1271	1	FALSE	Biliary
Glyco_hydro_59	9	1099	1	FALSE	Biliary
Glyco_transf_6	9	1228	1	FALSE	Biliary
GST_C	9	390	0.659559	FALSE	Biliary
GST_N_3	9	229	0.142027	FALSE	Biliary
His_Phos_2	9	756	1	FALSE	Biliary
HS1_rep	9	74	5.21013e-09	TRUE	Biliary
HSA	9	217	0.113363	FALSE	Biliary
Innexin	9	791	1	FALSE	Biliary
Lactamase_B	9	1000	1	FALSE	Biliary
Laminin_G_1	9	1225	1	FALSE	Biliary
LCCL	9	288	0.31624	FALSE	Biliary
LIM_bind	9	410	0.724008	FALSE	Biliary
Meckelin	9	922	1	FALSE	Biliary
Med24_N	9	987	1	FALSE	Biliary
Memo	9	285	0.306903	FALSE	Biliary
Neuralized	9	276	0.277983	FALSE	Biliary
NMDAR2_C	9	1361	1	FALSE	Biliary
NT-C2	9	454	0.857752	FALSE	Biliary
OGFr_N	9	214	0.106082	FALSE	Biliary
ORC2	9	312	0.395733	FALSE	Biliary
PALP	9	831	1	FALSE	Biliary
PAS_9	9	428	0.781003	FALSE	Biliary
Peptidase_M16_C	9	752	1	FALSE	Biliary
PH_9	9	421	0.759273	FALSE	Biliary
PIP5K	9	1378	1	FALSE	Biliary
PKD_channel	9	1855	1	FALSE	Biliary
PYRIN	9	576	1	FALSE	Biliary
RAI16-like	9	816	1	FALSE	Biliary
RBD	9	283	0.300596	FALSE	Biliary
Ribosomal_S27e	9	110	0.000191308	TRUE	Biliary
Sarcoglycan_2	9	687	1	FALSE	Biliary
SBF2	9	452	0.85189	FALSE	Biliary
Scramblase	9	260	0.22955	FALSE	Biliary
SDF	9	1713	1	FALSE	Biliary
Sec63	9	1331	1	FALSE	Biliary
SHMT	9	800	1	FALSE	Biliary
Snf7	9	748	1	FALSE	Biliary
Stork_head	9	109	0.00015952	TRUE	Biliary
Thioesterase	9	531	1	FALSE	Biliary
THRAP3_BCLAF1	9	1882	1	FALSE	Biliary
Thyroglobulin_1	9	399	0.688091	FALSE	Biliary
tRNA-synt_2c	9	1392	1	FALSE	Biliary
WT1	9	426	0.774849	FALSE	Biliary
Xan_ur_permease	9	967	1	FALSE	Biliary
YL1_C	9	23	1.48132e-42	TRUE	Biliary
Abhydrolase_1	8	983	1	FALSE	Biliary
ACC_central	8	727	1	FALSE	Biliary
Acyl-CoA_dh_M	8	118	0.00285243	TRUE	Biliary
Ammonium_transp	8	1572	1	FALSE	Biliary
APCDDC	8	660	1	FALSE	Biliary
ASXH	8	398	0.839539	FALSE	Biliary
BRICHOS	8	478	1	FALSE	Biliary
CABIT	8	813	1	FALSE	Biliary
CaKB	8	645	1	FALSE	Biliary
Caldesmon	8	496	1	FALSE	Biliary
CARD	8	523	1	FALSE	Biliary
CBS	8	356	0.692752	FALSE	Biliary
CitMHS	8	417	0.900861	FALSE	Biliary
DDE_1	8	1209	1	FALSE	Biliary
DUF106	8	187	0.0970771	TRUE	Biliary
DUF1387	8	549	1	FALSE	Biliary
[truncated: 77,182 more rows]
