# Supplementary material for: DCMP: database of cancer mutant protein domains
Source: Oxford University Press journal article supplement (doi:10.1093/database/baab066), 2021-01-01
Supplement: baab066_supp.zip [file baab066_supp.zip]

## Instructions for executing the Perl-API program

**Download the Perl program from the below GitHub link:**

<https://github.com/iarnoldemerson/Protein-to-genome-position.git>

### **# Protein-to-genome-position**

Perl program to convert the protein position into genomic position

#### **1) Required Perl modules**

```
use Bio::EnsEMBL::DBSQL::DBAdaptor;  
use Bio::EnsEMBL::Registry;  
use Bio::EnsEMBL::Translation;  
use Bio::EnsEMBL::Transcript;
```

#### **2) Input format**

Create a text file "input.txt" as file name and save the input in the below format that contains five column details: Ensemble\_id, domain\_start, domain\_end, Pfam\_id, Pfam\_name

|                   |    |     |            |       |
|-------------------|----|-----|------------|-------|
| ENST00000390396.1 | 20 | 115 | PF07686.12 | V-set |
| ENST00000390400.2 | 20 | 114 | PF07686.12 | V-set |
| ENST00000621184.1 | 20 | 115 | PF07686.12 | V-set |
| ENST00000390372.3 | 20 | 114 | PF07686.12 | V-set |
| ENST00000390369.2 | 20 | 115 | PF07686.12 | V-set |

#### **3) How to run the program**

Type the below command at the command or terminal prompt and place the input.txt file in the same folder where the Perl program is saved

```
For Windows:    C:\> perl protein_to_genome.pl  
For Linux:      $ perl protein_to_genome.pl
```

#### **4) Output format**

The output of the program is stored in the "output.txt" file with two column details:  
Ensemble\_id, Chr\_no:start-end

|                   |                       |
|-------------------|-----------------------|
| ENST00000390396.1 | 7:142646178-142646465 |
| ENST00000390400.2 | 7:142720874-142721158 |
| ENST00000621184.1 | 7:142581138-142581425 |
| ENST00000390372.3 | 7:142482734-142483018 |
| ENST00000390369.2 | 7:142455346-142455633 |
