# Supplementary material for: DCMP: database of cancer mutant protein domains
Source: Oxford University Press journal article supplement (doi:10.1093/database/baab066), 2021-01-01
Supplement: baab066_supp.zip [file baab066_supp.zip]

## The top ten significantly mutated domains for each cancer type

| Adrenal         | Snp_count | Biliary        | Snp_count | Bone          | Snp_count | Brain          | Snp_count | Breast           | Snp_count |
|-----------------|-----------|----------------|-----------|---------------|-----------|----------------|-----------|------------------|-----------|
| IRK             | 1062      | P53            | 1769      | P53           | 542       | P53            | 5359      | P53              | 10798     |
| P53             | 252       | Ras            | 1134      | zf-H2C2_2     | 418       | Iso_dh         | 4961      | PI3Ka            | 1958      |
| zf-H2C2_2       | 61        | zf-H2C2_2      | 577       | Iso_dh        | 323       | zf-H2C2_2      | 1410      | Hormone_recep    | 992       |
| VHL             | 48        | WD40           | 258       | G-alpha       | 233       | Furin-like     | 486       | Furin-like       | 305       |
| Cation_ATPase_N | 45        | Iso_dh         | 183       | PNP_UDP_1     | 85        | PNP_UDP_1      | 443       | PI3K_C2          | 300       |
| KRAB            | 22        | EGF_CA         | 145       | Pro-rich      | 42        | DSPc           | 440       | Runt             | 249       |
| HIF-1           | 21        | Furin-like     | 125       | Ank           | 38        | MIP            | 288       | CBF_beta         | 232       |
| HLH             | 11        | Bromodomain    | 111       | PHD           | 28        | PTEN_C2        | 284       | RB_A             | 227       |
| RB_A            | 10        | PI3Ka          | 91        | RB_A          | 28        | WD40           | 272       | Nebulin          | 204       |
| VWC             | 10        | KRAB           | 88        | EGF           | 24        | MHC_I          | 251       | zf-C2H2          | 202       |
| Cervix          | Snp_count | Endometrium    | Snp_count | Eye           | Snp_count | Kidney         | Snp_count | Large_interstine | Snp_count |
| zf-H2C2_2       | 653       | P53            | 1790      | G-alpha       | 583       | VHL            | 3006      | Ras              | 22094     |
| P53             | 223       | DSPc           | 1000      | Pkinase_Tyr   | 118       | P53            | 1411      | P53              | 11436     |
| WD40            | 209       | PTEN_C2        | 633       | Peptidase_C12 | 118       | zf-H2C2_2      | 1137      | Pkinase_Tyr      | 8639      |
| PI3Ka           | 182       | PI3Ka          | 362       | RB_A          | 78        | Bromodomain    | 813       | PI3Ka            | 1560      |
| Histone         | 111       | PI3K_p85B      | 312       | P53           | 45        | BAH            | 378       | Nebulin          | 863       |
| KRAB            | 86        | Nebulin        | 308       | Ras           | 41        | WD40           | 304       | MH2              | 814       |
| Keratin_B2_2    | 83        | DNA_pol_B_exo1 | 222       | WD40          | 16        | SET            | 220       | Plectin          | 728       |
| Gla             | 48        | MIR            | 206       | DUF3452       | 13        | UPF0640        | 209       | APC_crr          | 691       |
| MAGE_N          | 46        | Gla            | 175       | DSPc          | 9         | WT1            | 182       | CTNNB1_binding   | 598       |
| Ank             | 39        | HEAT           | 169       | eIF-1a        | 6         | Homeobox       | 171       | WTX              | 545       |
| Liver           | Snp_count | Lung           | Snp_count | Esophagus     | Snp_count | Ovary          | Snp_count | Pancreas         | Snp_count |
| P53             | 4452      | P53            | 13408     | P53           | 8370      | P53            | 4069      | Ras              | 8527      |
| KRAB            | 1298      | Pkinase_Tyr    | 10463     | PI3Ka         | 277       | Ras            | 1030      | P53              | 5189      |
| Nebulin         | 343       | Ras            | 9502      | EGF           | 267       | Fork_head      | 787       | zf-H2C2_2        | 1108      |
| HNF-1B_C        | 220       | Vinculin       | 811       | Nebulin       | 215       | zf-H2C2_2      | 569       | Ank_2            | 1010      |
| Gla             | 172       | FAM47          | 483       | Ank           | 144       | PI3Ka          | 197       | G-alpha          | 615       |
| IL6Ra-bind      | 151       | RB_A           | 474       | Plectin       | 118       | WD40           | 185       | Sushi            | 405       |
| DUF1220         | 143       | PI3Ka          | 456       | KAT11         | 97        | TSP_1          | 114       | WD40             | 304       |
| Filaggrin       | 134       | Ephrin_lbd     | 446       | CLN5          | 82        | KRAB           | 109       | MH2              | 283       |
| RB_A            | 134       | Plectin        | 396       | GVQW          | 76        | EGF_CA         | 94        | MH1              | 177       |
| Spy1            | 125       | Furin-like     | 342       | PNP_UDP_1     | 74        | Ribonuclease_3 | 84        | Nebulin          | 165       |

|                |           |                |           |                |           |             |           |              |           |
|----------------|-----------|----------------|-----------|----------------|-----------|-------------|-----------|--------------|-----------|
| Prostate       | Snp_count | Skin           | Snp_count | Stomach        | Snp_count | Testis      | Snp_count | Thyroid      | Snp_count |
| P53            | 2706      | Pkinase_Tyr    | 12208     | P53            | 3921      | Pkinase_Tyr | 116       | Pkinase_Tyr  | 15739     |
| zf-H2C2_2      | 1389      | P53            | 4277      | Plectin        | 206       | Ras         | 103       | Ras          | 1713      |
| Hormone_recep  | 669       | Glyco_hydro_31 | 1055      | Furin-like     | 185       | P53         | 53        | zf-H2C2_2    | 1628      |
| MATH           | 257       | Nebulin        | 830       | PI3Ka          | 182       | Pkinase     | 20        | P53          | 1356      |
| Fork_head      | 196       | Ephrin_lbd     | 727       | Nebulin        | 171       | fn3         | 16        | MIP          | 729       |
| Keratin_B2_2   | 168       | Na_trans_assoc | 606       | MIR            | 166       | HLH         | 12        | MHC_I        | 609       |
| zf-C2H2        | 134       | MIR            | 553       | Recep_L_domain | 152       | Cadherin    | 9         | CCDC144C     | 573       |
| PTEN_C2        | 76        | Pro-rich       | 507       | Ank            | 140       | PI3Ka       | 8         | Keratin_B2_2 | 410       |
| Nebulin        | 75        | NMDAR2_C       | 481       | ecTbetaR2      | 130       | MH2         | 7         | KRAB         | 379       |
| RB_A           | 63        | AIG1           | 476       | CLN5           | 100       | V-set       | 7         | Pro-rich     | 212       |
| Urinary        | Snp_count |                |           |                |           |             |           |              |           |
| P53            | 3684      |                |           |                |           |             |           |              |           |
| PI3Ka          | 534       |                |           |                |           |             |           |              |           |
| Furin-like     | 368       |                |           |                |           |             |           |              |           |
| RB_A           | 273       |                |           |                |           |             |           |              |           |
| zf-C2H2        | 190       |                |           |                |           |             |           |              |           |
| Recep_L_domain | 186       |                |           |                |           |             |           |              |           |
| Nebulin        | 133       |                |           |                |           |             |           |              |           |
| CDI            | 128       |                |           |                |           |             |           |              |           |
| Plectin        | 128       |                |           |                |           |             |           |              |           |
| PNP_UDP_1      | 125       |                |           |                |           |             |           |              |           |
